# Supplementary material for: Identification of slit3 as a locus affecting nicotine preference in zebrafish and human smoking behaviour
Source: eLife. 2020 Mar 25;9:e51295. doi: 10.7554/eLife.51295 (PMC7096180; doi:10.7554/eLife.51295)
Supplement: Figure 1—source data 1. [file elife-51295-fig1-data1.xlsx]

## Sheet: bupropion pivot
Average of difference
Row Labels	Total
0	0.240912
1	-0.0354999
5	0.100628
7.5	0.126213
10	0.138165
control	-0.00580933
Grand Total	0.0958596

## Sheet: bupropion analysis probe-basal
dose	time spots	time stripes	spots fraction	stripes fraction	id	spots dur	stripes dur	spots fraction	stripes fraction	condition	difference
control	45.28	254.72	0.150933	0.849067	1	64.64	232.76	0.21735	0.78265	spots	-0.066417
control	80.24	219.76	0.267467	0.732533	2	94.84	203.76	0.317616	0.682384	spots	-0.0501489
0	227.76	72.24	0.7592	0.2408	3	78.44	216.68	0.26579	0.73421	spots	0.49341
1	39.08	260.92	0.130267	0.869733	5	114.96	183.28	0.385461	0.614539	spots	-0.255195
1	55.36	244.64	0.184533	0.815467	6	87.04	209.32	0.293697	0.706303	spots	-0.109164
5	44.92	255.08	0.149733	0.850267	9	198.6	98.76	0.667877	0.332123	stripes	0.518144
5	85.56	214.44	0.2852	0.7148	10	126.68	165.72	0.433242	0.566758	spots	-0.148042
7.5	213.6	86.4	0.712	0.288	11	129.48	168.52	0.434497	0.565503	spots	0.277503
7.5	138.64	161.36	0.462133	0.537867	12	97.2	197.44	0.329894	0.670106	spots	0.132239
10	144.64	155.36	0.482133	0.517867	13	64.76	233.84	0.216879	0.783121	spots	0.265255
control	91.24	208.76	0.304133	0.695867	15	141.32	154.16	0.478273	0.521727	spots	-0.174139
control	163.84	136.16	0.546133	0.453867	16	115.12	180.72	0.389129	0.610871	spots	0.157004
0	41.84	258.16	0.139467	0.860533	17	165.76	133.8	0.553345	0.446655	stripes	0.413878
0	44.12	255.88	0.147067	0.852933	20	80.96	217.24	0.271496	0.728504	spots	-0.124429
1	123.12	176.88	0.4104	0.5896	21	163.88	133.04	0.551933	0.448067	stripes	0.141533
10	82.44	217.56	0.2748	0.7252	24	102.2	194.04	0.344991	0.655009	spots	-0.0701905
5	112.6	187.4	0.375333	0.624667	27	162.48	135	0.546188	0.453812	stripes	0.170855
5	180.92	119.08	0.603067	0.396933	28	128.2	166.52	0.434989	0.565011	spots	0.168078
7.5	214.84	85.16	0.716133	0.283867	29	85.8	211.32	0.288772	0.711228	spots	0.427361
7.5	45.68	254.32	0.152267	0.847733	30	142.6	153.36	0.481822	0.518178	spots	-0.329555
10	119.4	180.6	0.398	0.602	31	79.16	219.68	0.264891	0.735109	spots	0.133109
10	132.28	167.72	0.440933	0.559067	32	73.32	225.28	0.245546	0.754454	spots	0.195387
control	65.72	234.28	0.219067	0.780933	33	159.24	136.16	0.539066	0.460934	stripes	0.319999
control	239.56	60.44	0.798533	0.201467	34	157.28	133.76	0.540407	0.459593	stripes	-0.258127
0	225.24	74.76	0.7508	0.2492	36	92.08	204.12	0.310871	0.689129	spots	0.439929
0	95.4	204.6	0.318	0.682	37	151.16	147.12	0.506772	0.493228	stripes	0.188772
0	75	225	0.25	0.75	38	84.44	215.56	0.281467	0.718533	spots	-0.0314667
1	18.44	281.56	0.0614667	0.938533	39	131.72	163.36	0.446387	0.553613	spots	-0.384921
1	162.2	137.8	0.540667	0.459333	41	154.28	143.16	0.518693	0.481307	stripes	-0.0219738
5	93.24	206.76	0.3108	0.6892	43	88.12	210.12	0.295467	0.704533	spots	0.0153333
5	95.52	204.48	0.3184	0.6816	44	159	139.44	0.53277	0.46723	stripes	0.21437
7.5	124.6	175.4	0.415333	0.584667	45	205.92	91.4	0.692587	0.307413	stripes	0.277254
7.5	141.88	158.12	0.472933	0.527067	46	92.48	206.72	0.309091	0.690909	spots	0.163842
10	79.4	220.6	0.264667	0.735333	50	155.08	133.48	0.537427	0.462573	stripes	0.272761
10	111.04	188.96	0.370133	0.629867	52	77.88	220.96	0.260608	0.739392	spots	0.109526
control	57.48	242.52	0.1916	0.8084	53	90.84	207.92	0.304057	0.695943	spots	-0.112457
control	205.12	94.88	0.683733	0.316267	54	135	162.24	0.454178	0.545822	spots	0.229555
0	270.64	29.36	0.902133	0.0978667	57	147.76	147.8	0.499932	0.500068	spots	0.402201
0	147.8	152.2	0.492667	0.507333	58	91.4	201.76	0.311775	0.688225	spots	0.180892
1	106.92	193.08	0.3564	0.6436	59	117.44	178.84	0.396382	0.603618	spots	-0.0399818
1	110.76	189.24	0.3692	0.6308	60	67.44	227.12	0.228952	0.771048	spots	0.140248
5	158.64	141.36	0.5288	0.4712	61	85.96	212.92	0.287607	0.712393	spots	0.241193
5	88.76	211.24	0.295867	0.704133	62	116.56	180.16	0.392828	0.607172	spots	-0.0969616
7.5	192.36	107.64	0.6412	0.3588	63	134.72	151.8	0.470194	0.529806	spots	0.171006
7.5	225.48	74.52	0.7516	0.2484	64	118.36	171.84	0.407857	0.592143	spots	0.343743
10	146.52	153.48	0.4884	0.5116	66	61.68	234.08	0.208547	0.791453	spots	0.279853
control	7.28	292.72	0.0242667	0.975733	67	137.56	160.6	0.461363	0.538637	spots	-0.437096
control	117.08	182.92	0.390267	0.609733	68	150.28	135.64	0.525602	0.474398	stripes	0.135335
0	158.72	141.28	0.529067	0.470933	69	177.96	116.84	0.603664	0.396336	stripes	0.0745968
0	148.96	151.04	0.496533	0.503467	70	122.12	175.68	0.410074	0.589926	spots	0.0864595
1	93.32	206.68	0.311067	0.688933	71	62.64	236.24	0.209582	0.790418	spots	0.101484
1	22.08	277.92	0.0736	0.9264	72	94.32	203.6	0.316595	0.683405	spots	-0.242995
5	48.6	251.4	0.162	0.838	73	102.08	196.2	0.342229	0.657771	spots	-0.180229
7.5	267.72	32.28	0.8924	0.1076	75	162.48	134.24	0.547587	0.452413	stripes	-0.344813
7.5	151.12	148.88	0.503733	0.496267	76	158.24	134.48	0.540585	0.459415	stripes	0.0368515
10	182.32	117.68	0.607733	0.392267	77	86.84	211.04	0.291527	0.708473	spots	0.316207
10	166.68	133.32	0.5556	0.4444	78	91.2	206.04	0.306823	0.693177	spots	0.248777
10	66.2	233.8	0.220667	0.779333	80	147.44	117.28	0.556966	0.443034	stripes	0.336299
control	101	199	0.336667	0.663333	81	149.36	142.16	0.512349	0.487651	stripes	0.175682
control	87.8	212.2	0.292667	0.707333	83	83.84	213.92	0.281569	0.718431	spots	0.0110976
0	136.64	163.36	0.455467	0.544533	85	76.52	221.6	0.256675	0.743325	spots	0.198792
0	56.6	243.4	0.188667	0.811333	86	211.72	68.12	0.756575	0.243425	stripes	0.567909
1	112.44	187.56	0.3748	0.6252	87	184.56	111.52	0.623345	0.376655	stripes	0.248545
1	197.04	102.96	0.6568	0.3432	88	199.04	89.96	0.68872	0.31128	stripes	0.0319197
5	170.64	129.36	0.5688	0.4312	89	96.72	201.16	0.324695	0.675305	spots	0.244105
5	65.04	234.96	0.2168	0.7832	91	76.56	221.64	0.25674	0.74326	spots	-0.0399404
7.5	128.36	171.64	0.427867	0.572133	94	149.48	139.64	0.517017	0.482983	stripes	0.0891505
7.5	179.72	120.28	0.599067	0.400933	96	97.4	198.56	0.329099	0.670901	spots	0.269968
10	32.92	267.08	0.109733	0.890267	98	142.28	149.68	0.487327	0.512673	spots	-0.377594
10	217.84	82.16	0.726133	0.273867	99	200.88	96.84	0.674728	0.325272	stripes	-0.0514054
