# Supplementary material for: Identification of slit3 as a locus affecting nicotine preference in zebrafish and human smoking behaviour
Source: eLife. 2020 Mar 25;9:e51295. doi: 10.7554/eLife.51295 (PMC7096180; doi:10.7554/eLife.51295)
Supplement: Figure 2—source data 1. [file elife-51295-fig2-data1.xlsx]

## Sheet: gen_1
id	cpp_change
1	0.104718
1	-0.0546068
1	0.267638
1	0.220066		mean	0.116592
1	0.0807647
1	0.274078		count	92
1	-0.0172245
1	0.173159		st.dev	0.167693
1	-0.150587
1	0.200508
1	0.0766791
1	-0.0569304
1	0.114167
1	0.295933
1	0.200618
1	0.256173
1	0.283071
1	0.116309
1	-0.170501
1	0.0264777
1	0.244148
1	-0.138186
1	0.0684131
1	0.438343
1	0.0741196
1	-0.00808942
1	0.130892
1	-0.00276835
1	0.136325
1	0.149197
1	0.337378
1	-0.0912986
1	0.0419484
1	-0.0872679
1	-0.0183725
1	0.333978
1	0.136249
1	0.141095
1	-0.00966093
1	0.0770091
1	0.224115
1	0.392593
1	0.157683
1	-0.0133473
1	0.269183
1	0.089651
1	0.136814
1	0.0925605
1	-0.125457
1	0.356587
1	0.151721
1	0.0151346
1	0.196036
1	0.31718
1	-0.0935827
1	0.0862487
1	0.11949
1	0.0726092
1	0.0911402
1	0.39484
1	-0.0668113
1	0.139259
1	0.14556
1	-0.0882494
1	0.14769
1	0.120996
1	0.0990806
1	0.117872
1	0.247531
1	0.595284
1	0.293637
1	0.0469884
1	-0.236949
1	-0.0780481
1	0.307795
1	0.00205646
1	0.0781753
1	0.214294
1	0.103106
1	-0.178261
1	0.426593
1	0.0348066
1	0.280577
1	0.0912248
1	0.095326
1	0.0227154
1	-0.384012
1	0.134264
1	0.0473004
1	0.470744
1	0.392853
1	-0.0221318

## Sheet: gen_2
group	cpp_change		key
1	0.244133		1=high
1	0.164584		2=low
1	0.1452
1	0.339842
1	0.452542
1	0.129067
1	-0.0647045
1	0.208008
1	-0.000133333
1	0.0370667		high_mean	0.173385
1	0.109333		low_mean	0.0842507
1	0.152614		pop_mean	0.124642
1	0.114296
1	0.354912		high_count	92
1	0.24023		low_count	64
1	0.147733		pop_count	146
1	0.0888257
1	0.237867		high_st.dev	0.139926
1	0.187823		low_st.dev	0.152348
1	0.1064		pop_st.dev	0.157153
1	0.147267
1	0.197801
1	0.12537
1	0.241875
1	0.525125
1	0.310184
1	0.172874
1	0.364342
1	0.124925
1	-0.0349333
1	-0.0228
1	-0.0528642
1	-0.038258
1	0.0361333
1	0.311479
1	0.492667
1	0.0966279
1	-0.0883304
1	0.165189
1	0.309067
1	0.147467
1	0.211834
1	0.160113
1	0.0801696
1	0.231819
1	0.0435885
1	0.0338973
1	0.0862501
1	0.00253844
1	0.0693096
1	0.0822667
1	-0.00943657
1	0.216179
1	0.108334
1	0.140327
1	0.369564
1	0.218543
1	0.148409
1	0.181245
1	0.231129
1	0.195333
1	0.181733
1	0.210955
1	0.587136
1	0.0546865
1	0.0528489
1	0.1168
1	0.232757
1	0.262237
1	0.0129483
1	0.315366
1	0.0130747
1	0.278557
1	0.172098
1	0.0436802
1	0.252174
1	0.365376
1	0.0979691
1	0.583067
1	0.152867
1	0.155247
1	0.0645528
1	0.21179
1	0.111171
1	0.27055
1	0.0931963
1	0.106642
1	0.140612
1	0.365733
1	0.00699925
1	0.304711
1	0.405637
2	0.331113
2	0.160943
2	-0.0364818
2	-0.165301
2	0.0328
2	-0.165867
2	-0.0245369
2	0.12126
2	-0.0521333
2	0.0641077
2	-0.0892
2	0.134533
2	0.209147
2	0.224711
2	-0.0174667
2	0.0152785
2	0.00693333
2	0.155891
2	0.0648864
2	0.186933
2	0.0926314
2	-0.128058
2	0.273512
2	-0.30467
2	-0.203733
2	-0.0540573
2	0.0414248
2	0.0826957
2	-0.00571792
2	-0.2196
2	-0.0248
2	-0.0319844
2	-0.0181883
2	0.0961333
2	0.32071
2	0.185733
2	0.273741
2	-0.265699
2	-0.0992809
2	-0.120667
2	0.218789
2	0.05106
2	0.0631622
2	-0.171667
2	0.304749
2	0.0830667
2	0.0012
2	-0.0303744
2	0.159392
2	0.0814819
2	0.180134
2	0.0640371
2	-0.0974273
2	0.290947
2	0.122667
2	-0.123222
2	0.0308206
2	0.29317
2	0.0159725
2	0.166839
2	0.149467
2	0.124988
2	0.238049
2	-0.130144

## Sheet: gen_3
group	cpp_change		key
1	0.0130589		1=high
1	0.0161982		2=low
1	0.0198721
1	0.0579744
1	0.0700063
1	0.0717527
1	0.0742436
1	0.10352
1	0.115344
1	0.116605		high_mean	0.205212
1	0.120933		low_mean	0.0135982
1	0.124245		pop_mean	0.108037
1	0.127938
1	0.128119		high_count	69
1	0.128328		low_count	67
1	0.128389		pop_count	140
1	0.128408
1	0.135707		high_st.dev	0.0999594
1	0.138448		low_st.dev	0.0901199
1	0.139336		pop_st.dev	0.134986
1	0.140777
1	0.142476
1	0.145342
1	0.149578
1	0.14969
1	0.150673
1	0.156362
1	0.16267
1	0.165331
1	0.174631
1	0.1764
1	0.180277
1	0.18804
1	0.190629
1	0.19629
1	0.2073
1	0.208092
1	0.208155
1	0.210309
1	0.210713
1	0.211363
1	0.215675
1	0.216393
1	0.220009
1	0.2256
1	0.229018
1	0.231794
1	0.256362
1	0.257279
1	0.258624
1	0.270133
1	0.270459
1	0.277032
1	0.2956
1	0.310523
1	0.313585
1	0.316217
1	0.321409
1	0.324933
1	0.332733
1	0.335867
1	0.3366
1	0.341409
1	0.345615
1	0.351879
1	0.356667
1	0.362226
1	0.378739
1	0.523732
2	-0.186882
2	-0.182207
2	-0.154499
2	-0.1544
2	-0.154133
2	-0.14388
2	-0.0988323
2	-0.0980645
2	-0.0905192
2	-0.0698667
2	-0.0689779
2	-0.0666667
2	-0.0644156
2	-0.0644156
2	-0.0612444
2	-0.0600888
2	-0.0600888
2	-0.0591777
2	-0.0541481
2	-0.0457812
2	-0.0372
2	-0.0364206
2	-0.0348543
2	-0.0346721
2	-0.0334278
2	-0.0288897
2	-0.028075
2	-0.0216
2	-0.0138667
2	-0.00476044
2	-0.00397009
2	0.00669714
2	0.00834937
2	0.0117618
2	0.0193276
2	0.0227708
2	0.025721
2	0.0298114
2	0.0337904
2	0.0338074
2	0.0424267
2	0.0439535
2	0.0515622
2	0.0547386
2	0.0562604
2	0.0568156
2	0.0582559
2	0.0622915
2	0.0630371
2	0.0643974
2	0.0718695
2	0.0732233
2	0.0750667
2	0.0786667
2	0.0902667
2	0.092772
2	0.0951432
2	0.106438
2	0.108487
2	0.113565
2	0.116082
2	0.122914
2	0.126252
2	0.12747
2	0.1324
2	0.132982
2	0.133211
2	0.133395
2	0.134127
2	0.138093
2	0.233299
