# Supplementary material for: Identification of slit3 as a locus affecting nicotine preference in zebrafish and human smoking behaviour
Source: eLife. 2020 Mar 25;9:e51295. doi: 10.7554/eLife.51295 (PMC7096180; doi:10.7554/eLife.51295)
Supplement: Figure 3—source data 1. [file elife-51295-fig3-data1.xlsx]

## Sheet: sa1569 CPP
type	genotype	stripe	spot	stripe_pref	spot_pref	dist	condition_to	stripes_2	spots_2	stripe_pref_2	spot_pref_2	dist_2	change_score
sa1569	het	159.14	140.86	0.530473	0.469527	1362.66	spots	60.5	239.5	0.201673	0.798327	1172.35	0.3288
sa1569	het	95.66	204.34	0.318862	0.681138	1564.84	stripe	224.66	75.34	0.748862	0.251138	1544.83	0.433041
sa1569	wt	185.52	114.48	0.6184	0.3816	1286.05	spots	139.82	160.18	0.466052	0.533948	1103.32	0.152348
sa1569	wt	262.48	37.52	0.87495	0.12505	1182.4	spots	239.06	60.94	0.796866	0.203134	1382.4	0.0780835
sa1569	wt	123.03	176.97	0.410109	0.589891	1442.04	stripes	203.87	96.13	0.679583	0.320417	1154.53	0.269475
sa1569	wt	239.96	60.04	0.799866	0.200134	1495.68	spots	203.12	96.88	0.677083	0.322917	919.829	0.122784
sa1569	het	178.84	121.16	0.596133	0.403867	1672.23	spots	46.45	253.55	0.154829	0.845171	1669.98	0.441304
sa1569	het	245.89	54.11	0.819639	0.180361	1451.19	spots	92.82	207.18	0.309412	0.690588	1428.71	0.510227
sa1569	het	215.56	84.44	0.718533	0.281467	1143.41	spots	23.37	276.63	0.0779116	0.922088	937.338	0.640622
sa1569	het	118.37	181.63	0.394551	0.605449	925.269	stripe	259.37	40.63	0.864551	0.135449	1374	0.472131
wildtype	wt	220.12	79.88	0.733733	0.266267	1164.73	Spots	156.28	143.72	0.520933	0.479067	1480.1	0.2128
wildtype	wt	95.66	204.34	0.318862	0.681138	1408.65	Stripes	96.36	203.64	0.321212	0.678788	851.243	0.00234965
wildtype	wt	71.17	228.83	0.237225	0.762775	1164.99	Stripes	161.55	138.45	0.538502	0.461498	1231.46	0.301277
wildtype	wt	170.48	129.52	0.568267	0.431733	1480.25	Spots	146.4	153.6	0.488	0.512	1791.68	0.0802667
wildtype	wt	158.29	141.71	0.527622	0.472378	1236.47	Spots	157.92	142.08	0.526386	0.473614	1173.27	0.00123581
wildtype	wt	111.56	188.44	0.371879	0.628121	1295.33	Stripes	141.4	158.6	0.471333	0.528667	1107.3	0.0994546
wildtype	wt	185.01	114.99	0.616709	0.383291	1241.36	Spots	155.19	144.81	0.517285	0.482715	1252.53	0.0994244

## Sheet: sa1569 ANOVA
								ANOVA
								Table Analyzed	sa1569
								Data sets analyzed	A : wt_nic	C : sa1569_het_nic	D : wt_saline
								ANOVA summary
								F	27.34
								P value	<0.0001
								P value summary	****
								Significant diff. among means (P < 0.05)?	Yes
								R square	0.6694
								Brown-Forsythe test
								F (DFn, DFd)	0.1476 (2, 27)
								P value	0.8634
								P value summary	ns
								Are SDs significantly different (P < 0.05)?	No
								Bartlett's test
								Bartlett's statistic (corrected)	0.9957
								P value	0.6078
								P value summary	ns
								Are SDs significantly different (P < 0.05)?	No
								ANOVA table	SS	DF	MS	F (DFn, DFd)	P value
								Treatment (between columns)	0.9058	2	0.4529	F (2, 27) = 27.34	P<0.0001
								Residual (within columns)	0.4473	27	0.01657
								Total	1.353	29
								Data summary
								Number of treatments (columns)	3
								Number of values (total)	30
								TUKEY
								Number of families	1
								Number of comparisons per family	3
								Alpha	0.05
								Tukey's multiple comparisons test	Mean Diff.	95.00% CI of diff.	Significant?	Summary	Adjusted P Value
								wt_nic vs. sa1569_het_nic	-0.3572	-0.5347 to -0.1796	Yes	****	<0.0001	A-C
								wt_nic vs. wt_saline	0.09399	-0.04934 to 0.2373	No	ns	0.2523	A-D
								sa1569_het_nic vs. wt_saline	0.4512	0.2996 to 0.6027	Yes	****	<0.0001	C-D
								Test details	Mean 1	Mean 2	Mean Diff.	SE of diff.	n1	n2	q	DF
								wt_nic vs. sa1569_het_nic	0.1138	0.471	-0.3572	0.07161	7	6	7.054	27
								wt_nic vs. wt_saline	0.1138	0.01984	0.09399	0.05781	7	17	2.299	27
								sa1569_het_nic vs. wt_saline	0.471	0.01984	0.4512	0.06112	6	17	10.44	27

## Sheet: sa202 CPP
trial	arena	bin	id	line	genotype	treatment	spot	stripe	dist	spot_dur	stripe_dur	condition	spot_2	stripe_2	dist_2	spot_dur_2	stripe_dur_2	change
Trial 1	Arena 1	0:05:00-0:10:00	s1	sa202	het	5um_nic	171.866	128.134	1891.62	0.572887	0.427113	stripe	43.2006	256.199	1770.91	0.144291	0.855709	0.428596
Trial 1	Arena 3	0:05:00-0:10:00	s2	sa202	het	5um_nic	162.834	137.166	1545.86	0.54278	0.45722	stripe	68.6333	228.3	1579.15	0.23114	0.76886	0.31164
Trial 2	Arena 4	0:05:00-0:10:00	s4	sa202	het	5um_nic	130.5	169.333	1474.93	0.435242	0.564758	spot	95.4666	204.533	1889.99	0.318222	0.681778	-0.11702
Trial 4	Arena 2	0:05:00-0:10:00	s7	sa202	het	5um_nic	88.9996	201.767	1679.7	0.306086	0.693914	spot	119.933	179.967	1742.14	0.39991	0.60009	0.0938239
Trial 4	Arena 4	0:05:00-0:10:00	s8	sa202	het	5um_nic	65.633	230.6	1833.97	0.221559	0.778441	spot	117.667	182.333	1595.24	0.392223	0.607777	0.170665
Trial 6	Arena 2	0:05:00-0:10:00	s11	sa202	het	5um_nic	160.067	136.633	1646.97	0.539491	0.460509	stripe	114.167	185.833	1616.87	0.380557	0.619443	0.158934
Trial 6	Arena 4	0:05:00-0:10:00	s12	sa202	het	5um_nic	132.5	167.5	1989.88	0.441667	0.558333	spot	60.2666	239.733	1875.98	0.200889	0.799111	-0.240778
Trial 2	Arena 2	0:05:00-0:10:00	s3	sa202	wt	5um_nic	154.634	135.766	1642.19	0.532486	0.467514	stripe	161.167	135.7	1187.44	0.542893	0.457107	-0.0104067
Trial 3	Arena 1	0:05:00-0:10:00	s5	sa202	wt	5um_nic	96.2332	203.5	1503.21	0.321063	0.678937	spot	56.1666	243.833	1967.12	0.187222	0.812778	-0.133841
Trial 3	Arena 3	0:05:00-0:10:00	s6	sa202	wt	5um_nic	84.9666	215.033	1488.65	0.283222	0.716778	spot	156.133	143.867	1669.98	0.520443	0.479557	0.237221
Trial 5	Arena 1	0:05:00-0:10:00	s9	sa202	wt	5um_nic	72.2339	227.766	1897.95	0.24078	0.75922	spot	155.4	139.634	1561.75	0.526719	0.473281	0.285939
Trial 5	Arena 3	0:05:00-0:10:00	s10	sa202	wt	5um_nic	213.067	86.9329	1451.19	0.710224	0.289776	stripe	73.0666	226.933	1534.33	0.243556	0.756444	0.466668
Trial 7	Arena 1	0:05:00-0:10:00	s13	sa202	wt	5um_nic	166.967	133.033	1562.44	0.556557	0.443443	stripe	91.5663	206.334	1572.14	0.307372	0.692628	0.249184
Trial 7	Arena 3	0:05:00-0:10:00	s14	sa202	wt	5um_nic	121.634	178.366	1879.23	0.405447	0.594553	spot	161.1	136.1	1525.91	0.542059	0.457941	0.136613
Trial 8	Arena 1	0:05:00-0:10:00	s15	sa202	wt	5um_nic	137.067	140	1876.94	0.494707	0.505293	spot	180.3	114.767	1791.68	0.611048	0.388952	0.116341
Trial 2	Arena 3	0:05:00-0:10:00	wt4	wt	wt	5um_nic	25.4666	259.6	1902.92	0.0893356	0.910664	spot	84.9666	212.667	1236.24	0.285474	0.714526	0.196138
Trial 3	Arena 2	0:05:00-0:10:00	wt5	wt	wt	5um_nic	96.6672	199.9	1705.95	0.325954	0.674046	spot	70.0333	229.967	1164.73	0.233444	0.766556	-0.0925097
Trial 4	Arena 1	0:05:00-0:10:00	wt7	wt	wt	5um_nic	126.467	172.067	1343.3	0.423627	0.576373	spot	97.8663	200.067	1813.07	0.328484	0.671516	-0.0951429
Trial 4	Arena 3	0:05:00-0:10:00	wt8	wt	wt	5um_nic	112.833	187.167	1353.55	0.37611	0.62389	spot	91.6332	208.367	1582.64	0.305444	0.694556	-0.0706662
Trial 6	Arena 3	0:05:00-0:10:00	wt12	wt	wt	5um_nic	164.633	135.367	1922.63	0.548777	0.451223	stripe	70.5999	229.033	1382.4	0.235621	0.764379	0.313155
Trial 7	Arena 2	0:05:00-0:10:00	wt13	wt	wt	5um_nic	93.2002	199.266	1417.82	0.31867	0.68133	spot	215.967	78.8333	1858.15	0.732587	0.267413	0.413917
Trial 7	Arena 4	0:05:00-0:10:00	wt14	wt	wt	5um_nic	160.167	139.833	1164.99	0.53389	0.46611	stripe	88.0002	152.567	1558.93	0.365803	0.634197	0.168087
Trial 1	Arena 2	0:05:00-0:10:00	wt1	wt	wt	saline	74.4672	225.533	1950.03	0.248224	0.751776	spot	199.233	99.4669	1779.04	0.667001	0.332999	0.418777
Trial 1	Arena 4	0:05:00-0:10:00	wt2	wt	wt	saline	229.233	70.7666	1236.69	0.764111	0.235889	stripe	259.767	38.3333	1875.03	0.871408	0.128592	-0.107297
Trial 2	Arena 1	0:05:00-0:10:00	wt3	wt	wt	saline	111.933	188.067	1468.13	0.37311	0.62689	spot	113.267	186.733	1334	0.377557	0.622443	0.00444667
Trial 3	Arena 4	0:05:00-0:10:00	wt6	wt	wt	saline	147.6	152.4	1561.81	0.492	0.508	spot	135.866	164.134	1165.01	0.452887	0.547113	-0.0391133
Trial 5	Arena 2	0:05:00-0:10:00	wt9	wt	wt	saline	121.3	171.667	1688.17	0.41404	0.58596	spot	108.867	186.033	1038.52	0.369166	0.630834	-0.044874
Trial 5	Arena 4	0:05:00-0:10:00	wt10	wt	wt	saline	117.766	177.734	1559.27	0.398531	0.601469	spot	53.9666	246.033	1159.32	0.179889	0.820111	-0.218642
Trial 6	Arena 1	0:05:00-0:10:00	wt11	wt	wt	saline	117.5	182.5	1544.83	0.391667	0.608333	spot	135.367	164.633	1169.18	0.451223	0.548777	0.0595567
Trial 8	Arena 2	0:05:00-0:10:00	wt15	wt	wt	saline	125.7	159.533	1442.32	0.440692	0.559308	spot	108.1	190.1	1947.36	0.362508	0.637492	-0.078184

## Sheet: sa202 ANOVA
								ANOVA
								Table Analyzed	sa202
								Data sets analyzed	A : sa202_het_5uM_nic	B : sa202_wt_5uM_nic	C : wt_5uM_nic	E : wt_for_202_saline
								ANOVA summary
								F	5.79
								P value	0.0017
								P value summary	**
								Significant diff. among means (P < 0.05)?	Yes
								R square	0.2468
								Brown-Forsythe test
								F (DFn, DFd)	0.1723 (3, 53)
								P value	0.9147
								P value summary	ns
								Are SDs significantly different (P < 0.05)?	No
								Bartlett's test
								Bartlett's statistic (corrected)	1.02
								P value	0.7964
								P value summary	ns
								Are SDs significantly different (P < 0.05)?	No
								ANOVA table	SS	DF	MS	F (DFn, DFd)	P value
								Treatment (between columns)	0.4678	3	0.1559	F (3, 53) = 5.79	P=0.0017
								Residual (within columns)	1.428	53	0.02694
								Total	1.895	56
								Data summary
								Number of treatments (columns)	4
								Number of values (total)	57
								TUKEY
								Number of families	1
								Number of comparisons per family	6
								Alpha	0.05
								Tukey's multiple comparisons test	Mean Diff.	95.00% CI of diff.	Significant?	Summary	Adjusted P Value
								sa202_het_5uM_nic vs. sa202_wt_5uM_nic	0.1319	-0.02319 to 0.2871	No	ns	0.1217	A-B
								sa202_het_5uM_nic vs. wt_5uM_nic	0.169	0.02173 to 0.3162	Yes	*	0.0185	A-C
								sa202_het_5uM_nic vs. wt_for_202_saline	0.264	0.07903 to 0.449	Yes	**	0.0022	A-E
								sa202_wt_5uM_nic vs. wt_5uM_nic	0.03703	-0.1201 to 0.1941	No	ns	0.9236	B-C
								sa202_wt_5uM_nic vs. wt_for_202_saline	0.1321	-0.06086 to 0.325	No	ns	0.2775	B-E
								wt_5uM_nic vs. wt_for_202_saline	0.09505	-0.09159 to 0.2817	No	ns	0.5354	C-E
								Test details	Mean 1	Mean 2	Mean Diff.	SE of diff.	n1	n2	q	DF
								sa202_het_5uM_nic vs. sa202_wt_5uM_nic	0.2633	0.1314	0.1319	0.05848	18	14	3.19	53
								sa202_het_5uM_nic vs. wt_5uM_nic	0.2633	0.09438	0.169	0.05551	18	17	4.305	53
								sa202_het_5uM_nic vs. wt_for_202_saline	0.2633	-0.0006663	0.264	0.06974	18	8	5.354	53
								sa202_wt_5uM_nic vs. wt_5uM_nic	0.1314	0.09438	0.03703	0.05923	14	17	0.884	53
								sa202_wt_5uM_nic vs. wt_for_202_saline	0.1314	-0.0006663	0.1321	0.07274	14	8	2.568	53
								wt_5uM_nic vs. wt_for_202_saline	0.09438	-0.0006663	0.09505	0.07037	17	8	1.91	53
