# Supplementary material for: Identification of slit3 as a locus affecting nicotine preference in zebrafish and human smoking behaviour
Source: eLife. 2020 Mar 25;9:e51295. doi: 10.7554/eLife.51295 (PMC7096180; doi:10.7554/eLife.51295)
Supplement: Figure 5—source data 1. [file elife-51295-fig5-data1.xlsx]

## Sheet: antiTH_DDC
			Unpaired t test
			P value	0.1196
			P value summary	ns
	CELL COUNT		Significantly different? (P < 0.05)	No
			One- or two-tailed P value?	Two-tailed
Slit3 +/+	Slit3 sa1569/sa1569		t, df	t=1.742 df=8
174	71
241	237		How big is the difference?
156	133		Mean ± SEM of column A	209.0 ± 18.34, n=5
244	201		Mean ± SEM of column B	139.8 ± 35.23, n=5
230	57		Difference between means	-69.20 ± 39.72
			95% confidence interval	-160.8 to 22.39
			R squared	0.2751
			F test to compare variances
			F,DFn, Dfd	3.693, 4, 4
			P value	0.2338
			Significantly different? (P < 0.05)	No

## Sheet: antiTH_MO-AP
			Unpaired t test
			P value	0.1711
			P value summary	ns
	CELL COUNT		Significantly different? (P < 0.05)	No
			One- or two-tailed P value?	Two-tailed
Slit3 +/+	Slit3 sa1569/sa1569		t, df	t=1.504 df=8
162	68
64	148		How big is the difference?
239	190		Mean ± SEM of column A	196.6 ± 39.53, n=5
297	164		Mean ± SEM of column B	124.4 ± 27.25, n=5
221	52		Difference between means	-72.20 ± 48.01
			95% confidence interval	-182.9 to 38.52
			R squared	0.2204
			F test to compare variances
			F,DFn, Dfd	2.104, 4, 4
			P value	0.4889
			P value summary	ns
			Significantly different? (P < 0.05)	No

## Sheet: antiTH_axonpeaks
	AXON PEAKS
	Z-STACK	Slit3 +/+					Slit3 sa1569/sa1569
	1	3	6	0	1	0	0	1	0	5	0
	2	3	3	3	1	0	0	2	1	7	0
	3	6	13	12	11	3	1	11	4	7	0
Z-STACK	P value	Mean1	Mean2	Difference	SE of difference	t ratio	df
1	0.607511	2	1.2	0.8	1.49666	0.534522	8
2	1	2	2	0	1.44914	0	8
3	0.152874	9	4.6	4.4	2.78568	1.57951	8

## Sheet: antiTH_axonpeaks_raw_data
FISH_ID	stack	peaks>20GrayValue	Z-position	Z-total
hom_11	1	0	40	157
hom_11	2	0	50	157
hom_11	3	1	60	157
hom_12	1	1	40	169
hom_12	2	2	50	169
hom_12	3	11	60	169
hom_13	1	0	40	191
hom_13	2	1	50	191
hom_13	3	4	60	191
hom_14b	1	5	40	160
hom_14b	2	7	50	160
hom_14b	3	7	60	160
hom_15b	1	0	40	163
hom_15b	2	0	50	163
hom_15b	3	0	60	163
wt_10	1	3	40	166
wt_10	2	3	50	166
wt_10	3	6	60	166
wt_14	1	6	40	166
wt_14	2	3	50	166
wt_14	3	13	60	166
wt_15	1	0	40	154
wt_15	2	3	50	154
wt_15	3	12	60	154
wt_8	1	1	40	191
wt_8	2	1	50	191
wt_8	3	11	60	191
wt_9	1	0	40	183
wt_9	2	0	50	183
wt_9	3	3	60	183

## Sheet: 5HT
	CELL COUNT
AREA	Slit3 +/+					Slit3 sa1569/sa1569
RH	21	15	15	8	18	15	8	24	30	20
RN	34	38	43	37	49	58	35	38	53	51
HL-R + HL-L	74	106	109	45	50	93	50	94	129	108
		P value	Mean1	Mean2	Difference	SE of difference	t ratio	df
	RH	0.383472	15.4	19.4	-4	4.3382	0.922041	8
	RN	0.225736	40.2	47	-6.8	5.18073	1.31256	8
	HL-R + HL-L	0.363557	76.8	94.8	-18	18.6837	0.963408	8
