# Supplementary material for: Identification of slit3 as a locus affecting nicotine preference in zebrafish and human smoking behaviour
Source: eLife. 2020 Mar 25;9:e51295. doi: 10.7554/eLife.51295 (PMC7096180; doi:10.7554/eLife.51295)
Supplement: Figure 6—source code 1. [file elife-51295-fig6-code1.r]

##to turn original responsive/not responsive data into proportions: 

Fig6all <- read.csv(file.choose(), header=T)

##Figure 6a:
WTtapsresponsiveindiv <- data.frame(aggregate(responsiveindiv ~ Dose+tap.number, WTFig6all, sum))
WTtapsresponsiveindiv$Dose <- as.factor(WTtapsresponsiveindiv$Dose)
WTtapsresponsiveindiv$tap.number.Dose <- paste(WTtapsresponsiveindiv$tap.number,WTtapsresponsiveindiv$Dose)
WTFig6all$tap.number.Dose <- paste(WTFig6all$tap.number, WTFig6all$Dose)
WTtapsresponsiveindiv$total.individuals <- table(WTFig6all$tap.number.Dose)
WTtapsresponsiveindiv$prop <- (WTtapsresponsiveindiv$responsiveindiv/WTtapsresponsiveindiv$total.individuals)

ggplot(WTtapsresponsiveindivnodrug, aes(x=tap.number, y=prop, group=1))+
  geom_point()+
  geom_smooth(method=lm,formula= (y ~ log(x)), se=FALSE)+
  scale_x_continuous(breaks=c(1,2,3,4,5,6,7,8,9,10))+
  theme_bw() +
    ylim(0,0.8)+
  labs(x="stimulus event number", y="proportion of WT individuals responding") +
  theme(panel.grid.major = element_blank(), panel.grid.minor = element_blank(), panel.background = element_blank()) + theme(panel.grid.major = element_blank(), panel.grid.minor = element_blank(), panel.background = element_blank())+
  theme(axis.title = element_text(size = 13))+
  theme_classic()
  


##Figure 6c: Genotypes (no drug)
nodrugFig6all <- subset(Fig6all, Dose=="0")

nodrugtapsresponsiveindiv <- data.frame(aggregate(responsiveindiv ~ Genotype+tap.number, nodrugFig6all, sum))
nodrugtapsresponsiveindiv$tap.number.Genotype <- paste(nodrugtapsresponsiveindiv$tap.number,nodrugtapsresponsiveindiv$Genotype)
nodrugFig6all$tap.number.Genotype <- paste(nodrugFig6all$tap.number,nodrugFig6all$Genotype)
nodrugtapsresponsiveindiv$total.individuals <- table(nodrugFig6all$tap.number.Genotype)
nodrugtapsresponsiveindiv$prop <- (nodrugtapsresponsiveindiv$responsiveindiv/nodrugtapsresponsiveindiv$total.individuals)

ggplot(nodrugtapsresponsiveindiv, aes(x=tap.number, y=prop, colour=Genotype))+
  geom_point()+
  geom_smooth(method=lm,formula= (y ~ log(x)), se=FALSE)+
  scale_x_continuous(breaks=c(1,2,3,4,5,6,7,8,9,10))+
  theme_bw() +
  labs(x="stimulus event number", y="proportion of individuals from \n each genotype responding") +
  theme(panel.grid.major = element_blank(), panel.grid.minor = element_blank(), panel.background = element_blank()) + theme(panel.grid.major = element_blank(), panel.grid.minor = element_blank(), panel.background = element_blank())+
  ylim(0,0.8)+
   theme(axis.title = element_text(size = 13))+
  theme_classic()

##Figure 6d (genotype by dose across all taps)

notapnumberresponsiveindiv <- data.frame(aggregate(responsiveindiv ~ Genotype+Dose, Fig6all, sum))
notapnumberresponsiveindiv$Dose <- as.factor(notapnumberresponsiveindiv$Dose)
notapnumberresponsiveindiv$DoseGenotype <- paste(notapnumberresponsiveindiv$Dose, notapnumberresponsiveindiv$Genotype)
notapnumberresponsiveindiv$total.individuals <- table(Fig6all$DoseGenotype)
notapnumberresponsiveindiv$prop <- (notapnumberresponsiveindiv$responsiveindiv/notapnumberresponsiveindiv$total.individuals)

notapnumberresponsiveindiv$Dose.num <- as.numeric(notapnumberresponsiveindiv$Dose)
notapnumberresponsiveindiv$prop <- as.numeric(notapnumberresponsiveindiv$prop) 
                                              
ggplot(notapnumberresponsiveindiv, aes(x=Dose.num, y=prop, colour=Genotype,))+
  geom_point()+
  geom_line(aes(color=Genotype))+
  theme_bw() +
  labs(x="Dose (mg/L", y="proportion of individuals from each \n genotype responding to stimulus") +
 scale_x_continuous(breaks=c(1,2,3,4),labels=c("0.0", "0.05", "0.10", "0.50"))+
  theme(panel.grid.major = element_blank(), panel.grid.minor = element_blank(), panel.background = element_blank()) + theme(panel.grid.major = element_blank(), panel.grid.minor = element_blank(), panel.background = element_blank())+
  theme(plot.title = element_text(hjust = 0.5))+
  theme_classic() 


##Figure 6e
WTFig6all <- subset(Fig6all, Genotype=="WT")


WTbydoseresponsiveindiv <- data.frame(aggregate(responsiveindiv ~ tap.number+Dose, WTFig6all, sum))
WTbydoseresponsiveindiv$Dose <- as.factor(WTbydoseresponsiveindiv$Dose)
WTbydoseresponsiveindiv$tap.number.Dose <- paste(WTbydoseresponsiveindiv$Dose, WTbydoseresponsiveindiv$tap.number)
WTFig6all$tap.number.Dose <- paste(WTFig6all$Dose, WTFig6all$tap.number)
WTbydoseresponsiveindiv$total.individuals <- table(WTFig6all$tap.number.Dose)
WTbydoseresponsiveindiv$prop <- (WTbydoseresponsiveindiv$responsiveindiv/WTbydoseresponsiveindiv$total.individuals)

ggplot(WTbydoseresponsiveindiv, aes(x=tap.number, y=prop, colour=Dose,))+
  geom_point()+
  theme_bw() +
  geom_smooth(aes(color=Dose),method=lm,formula= (y ~ log(x)), se=FALSE)+
  labs(x="stimulus event number", y="proportion of WT individuals from each \n dose responding to stimulus") +
  scale_x_continuous(breaks=c(1,2,3,4,5,6,7,8,9,10))+
  scale_color_discrete(name = "Dose (mg/L)", labels = c("0.0", "0.05", "0.10", "0.5"))+
  ylim(0,0.8)+
  theme(panel.grid.major = element_blank(), panel.grid.minor = element_blank(), panel.background = element_blank()) + theme(panel.grid.major = element_blank(), panel.grid.minor = element_blank(), panel.background = element_blank())+
   theme(axis.title = element_text(size = 13))+
  theme_classic()

##Figure 6f

HOMFig6all <- subset(Fig6all, Genotype=="HOM")

HOMbydoseresponsiveindiv <- data.frame(aggregate(responsiveindiv ~ tap.number+Dose, HOMFig6all, sum))
HOMbydoseresponsiveindiv$Dose <- as.factor(HOMbydoseresponsiveindiv$Dose)
HOMbydoseresponsiveindiv$tap.number.Dose <- paste(HOMbydoseresponsiveindiv$Dose, HOMbydoseresponsiveindiv$tap.number)
HOMFig6all$tap.number.Dose <- paste(HOMFig6all$Dose, HOMFig6all$tap.number)
HOMbydoseresponsiveindiv$total.individuals <- table(HOMFig6all$tap.number.Dose)
HOMbydoseresponsiveindiv$prop <- (HOMbydoseresponsiveindiv$responsiveindiv/HOMbydoseresponsiveindiv$total.individuals)

ggplot(HOMbydoseresponsiveindiv, aes(x=tap.number, y=prop, colour=Dose,))+
  geom_point()+
  geom_smooth(aes(color=Dose),  method=lm,formula= (y ~ log(x)), se=FALSE)+
  theme_bw() +
  labs(x="stimulus event number", y="proportion of HOM individuals from each \n dose responding to stimulus") +
  scale_x_continuous(breaks=c(1,2,3,4,5,6,7,8,9,10))+
  scale_color_discrete(name = "Dose (mg/L)", labels = c("0.0", "0.05", "0.10", "0.50"))+
  ylim(0,0.8)+
  theme(panel.grid.major = element_blank(), panel.grid.minor = element_blank(), panel.background = element_blank()) + theme(panel.grid.major = element_blank(), panel.grid.minor = element_blank(), panel.background = element_blank())+
   theme(axis.title = element_text(size = 13))+
  theme_classic()
