# Supplementary material for: Identification of slit3 as a locus affecting nicotine preference in zebrafish and human smoking behaviour
Source: eLife. 2020 Mar 25;9:e51295. doi: 10.7554/eLife.51295 (PMC7096180; doi:10.7554/eLife.51295)
Supplement: Figure 6—source data 1. [file elife-51295-fig6-data1.csv]

	Fish_ID2	X	Plate	Arena	Fish_ID	Time	timepoint	Dose	Genotype	Trial_day	Distance_moved	Velocity	DoseGenotype	TIMEPOINT	mean.dist.baseline	sd.dist.baseline	tap.number	responsiveindiv	tap.number.Genotype
1	1	16	1	1	1	0:00:15-0:00:16	16	0	WT	12:49.0	7.70012	7.70016	0.0-WT	16	1.180561286	1.135888549	1	1	1 WT
2	2	82	1	2	2	0:00:15-0:00:16	16	0	HET	12:49.0	5.81929	5.81931	0.0-HET	16	2.011318286	0.970482169	1	1	1 HET
3	3	148	1	3	3	0:00:15-0:00:16	16	0	HOM	12:49.0	5.21536	5.21538	0.0-HOM	16	2.889595714	0.904587765	1	1	1 HOM
4	4	214	1	4	4	0:00:15-0:00:16	16	0	WT	12:49.0	1.21845	1.21846	0.0-WT	16	2.368274	1.168113455	1	0	1 WT
5	5	280	1	6	6	0:00:15-0:00:16	16	0	HOM	12:49.0	3.61595	3.61596	0.0-HOM	16	0.013573627	0.035871086	1	0	1 HOM
6	7	412	1	8	8	0:00:15-0:00:16	16	0.05	HET	12:49.0	3.69378	3.6938	0.05HET	16	0.647693429	0.44453187	1	0	1 HET
7	8	478	1	9	9	0:00:15-0:00:16	16	0.05	HOM	12:49.0	7.35981	7.35984	0.05HOM	16	5.395067143	1.408212512	1	1	1 HOM
8	9	544	1	10	10	0:00:15-0:00:16	16	0.05	WT	12:49.0	4.66541	4.66543	0.05WT	16	2.577101429	1.153030511	1	1	1 WT
9	10	610	1	11	11	0:00:15-0:00:16	16	0.05	HET	12:49.0	4.12754	4.12756	0.05HET	16	2.877030143	2.307565872	1	0	1 HET
10	11	676	1	12	12	0:00:15-0:00:16	16	0.05	HOM	12:49.0	3.55284	3.55285	0.05HOM	16	1.740242286	0.652992436	1	0	1 HOM
11	12	742	1	13	13	0:00:15-0:00:16	16	0.1	WT	12:49.0	8.02755	8.02758	0.1WT	16	2.032282429	1.084776067	1	1	1 WT
12	13	808	1	14	14	0:00:15-0:00:16	16	0.1	HET	12:49.0	7.15567	7.1557	0.1HET	16	2.210420857	0.995603805	1	1	1 HET
13	14	874	1	15	15	0:00:15-0:00:16	16	0.1	HOM	12:49.0	5.27843	5.27845	0.1HOM	16	1.667926914	1.106488132	1	1	1 HOM
14	15	940	1	16	16	0:00:15-0:00:16	16	0.1	WT	12:49.0	4.69053	4.69055	0.1WT	16	0.381698357	0.470994943	1	1	1 WT
15	16	1006	1	17	17	0:00:15-0:00:16	16	0.1	HET	12:49.0	10.3839	10.3839	0.1HET	16	1.353618571	0.737939176	1	1	1 HET
16	17	1072	1	18	18	0:00:15-0:00:16	16	0.1	HOM	12:49.0	5.04043	5.04045	0.1HOM	16	0.914573143	0.657132531	1	1	1 HOM
17	18	1138	1	19	19	0:00:15-0:00:16	16	0.5	WT	12:49.0	6.65419	6.65422	0.5WT	16	1.497794143	0.873332404	1	1	1 WT
18	19	1204	1	20	20	0:00:15-0:00:16	16	0.5	HET	12:49.0	7.76018	7.76021	0.5HET	16	0.208540143	0.04954608	1	1	1 HET
19	20	1270	1	21	21	0:00:15-0:00:16	16	0.5	HOM	12:49.0	7.79606	7.79609	0.5HOM	16	0.297336857	0.315797242	1	1	1 HOM
20	21	1336	1	22	22	0:00:15-0:00:16	16	0.5	WT	12:49.0	3.08676	3.08677	0.5WT	16	1.779207571	1.952981837	1	0	1 WT
21	22	1402	1	23	23	0:00:15-0:00:16	16	0.5	HET	12:49.0	8.8574	8.85744	0.5HET	16	2.606451429	1.22774317	1	1	1 HET
22	23	1468	1	24	24	0:00:15-0:00:16	16	0.5	HOM	12:49.0	6.2647	6.26473	0.5HOM	16	0.349793143	0.123948779	1	1	1 HOM
23	24	1534	2	1	25	0:00:15-0:00:16	16	0.5	HOM	12:51.0	5.62527	5.62529	0.5HOM	16	1.437309	1.019745158	1	1	1 HOM
24	25	1600	2	2	26	0:00:15-0:00:16	16	0.5	HET	12:51.0	5.25017	5.2502	0.5HET	16	1.794850429	1.162152569	1	1	1 HET
25	28	1798	2	5	29	0:00:15-0:00:16	16	0.5	HET	12:51.0	6.47593	6.47596	0.5HET	16	2.3201377	2.988938233	1	1	1 HET
26	29	1864	2	6	30	0:00:15-0:00:16	16	0.5	WT	12:51.0	4.37474	4.37476	0.5WT	16	1.042406286	1.605198035	1	0	1 WT
27	30	1930	2	7	31	0:00:15-0:00:16	16	0.1	HOM	12:51.0	2.89452	2.89453	0.1HOM	16	1.173173714	0.403128626	1	0	1 HOM
28	31	1996	2	8	32	0:00:15-0:00:16	16	0.1	HET	12:51.0	7.59404	7.59408	0.1HET	16	3.233362857	1.347631451	1	1	1 HET
29	33	2128	2	10	34	0:00:15-0:00:16	16	0.1	HOM	12:51.0	7.59561	7.59564	0.1HOM	16	2.229919857	1.023574587	1	1	1 HOM
30	34	2194	2	11	35	0:00:15-0:00:16	16	0.1	HET	12:51.0	5.65294	5.65296	0.1HET	16	0.300534571	0.066941886	1	1	1 HET
31	35	2260	2	12	36	0:00:15-0:00:16	16	0.1	WT	12:51.0	7.04056	7.04059	0.1WT	16	1.923331571	1.26464084	1	1	1 WT
32	37	2392	2	14	38	0:00:15-0:00:16	16	0.05	HET	12:51.0	8.94787	8.94792	0.05HET	16	2.290424429	1.351957642	1	1	1 HET
33	39	2524	2	16	40	0:00:15-0:00:16	16	0.05	HOM	12:51.0	6.07279	6.07281	0.05HOM	16	3.029794286	1.322979054	1	1	1 HOM
34	40	2590	2	17	41	0:00:15-0:00:16	16	0.05	HET	12:51.0	8.76419	8.76422	0.05HET	16	2.539301429	0.756876461	1	1	1 HET
35	41	2656	2	18	42	0:00:15-0:00:16	16	0.05	WT	12:51.0	9.20049	9.20053	0.05WT	16	3.043902857	2.094220958	1	1	1 WT
36	42	2722	2	19	43	0:00:15-0:00:16	16	0	HOM	12:51.0	10.1532	10.1533	0.0-HOM	16	0.703719	1.693157901	1	1	1 HOM
37	44	2854	2	21	45	0:00:15-0:00:16	16	0	WT	12:51.0	10.1201	10.1201	0.0-WT	16	0.2453313	0.130157665	1	1	1 WT
38	45	2920	2	22	46	0:00:15-0:00:16	16	0	HOM	12:51.0	7.54135	7.54137	0.0-HOM	16	4.174741429	2.660700231	1	1	1 HOM
39	46	2986	2	23	47	0:00:15-0:00:16	16	0	HET	12:51.0	4.74404	4.74406	0.0-HET	16	0.044198253	0.05314635	1	1	1 HET
40	47	3052	2	24	48	0:00:15-0:00:16	16	0	WT	12:51.0	8.24967	8.24971	0.0-WT	16	1.371783857	0.542303383	1	1	1 WT
41	48	3118	3	2	50	0:00:15-0:00:16	16	0.05	HOM	12:53.0	6.93866	6.93869	0.05HOM	16	4.12366	1.869821986	1	1	1 HOM
42	49	3184	3	3	51	0:00:15-0:00:16	16	0.05	WT	12:53.0	5.33653	5.33655	0.05WT	16	1.020839714	0.57873795	1	1	1 WT
43	52	3382	3	6	54	0:00:15-0:00:16	16	0.05	WT	12:53.0	0.587905	0.587908	0.05WT	16	1.159357	0.385291578	1	0	1 WT
44	54	3514	3	8	56	0:00:15-0:00:16	16	0	HOM	12:53.0	6.47176	6.47179	0.0-HOM	16	3.553782857	1.049053809	1	1	1 HOM
45	55	3580	3	9	57	0:00:15-0:00:16	16	0	WT	12:53.0	0.959959	0.959964	0.0-WT	16	1.986372	1.224975965	1	0	1 WT
46	56	3646	3	10	58	0:00:15-0:00:16	16	0	HET	12:53.0	8.84268	8.84272	0.0-HET	16	0.720728714	1.027707677	1	1	1 HET
47	57	3712	3	11	59	0:00:15-0:00:16	16	0	HOM	12:53.0	6.1707	6.17072	0.0-HOM	16	1.423637	0.765596929	1	1	1 HOM
48	58	3778	3	12	60	0:00:15-0:00:16	16	0	WT	12:53.0	7.59972	7.59975	0.0-WT	16	0.740175714	1.055826303	1	1	1 WT
49	59	3844	3	13	61	0:00:15-0:00:16	16	0.5	HET	12:53.0	7.91925	7.91928	0.5HET	16	0.641043714	0.261813274	1	1	1 HET
50	60	3910	3	14	62	0:00:15-0:00:16	16	0.5	HOM	12:53.0	5.4224	5.42243	0.5HOM	16	2.810754286	1.239577453	1	1	1 HOM
51	61	3976	3	15	63	0:00:15-0:00:16	16	0.5	WT	12:53.0	8.09376	8.09379	0.5WT	16	2.64463	1.196078924	1	1	1 WT
52	62	4042	3	16	64	0:00:15-0:00:16	16	0.5	HET	12:53.0	9.04291	9.04295	0.5HET	16	0.471522143	0.308495034	1	1	1 HET
53	63	4108	3	17	65	0:00:15-0:00:16	16	0.5	HOM	12:53.0	6.10421	6.10423	0.5HOM	16	2.187195857	1.331574952	1	1	1 HOM
54	64	4174	3	18	66	0:00:15-0:00:16	16	0.5	WT	12:53.0	3.45185	3.45187	0.5WT	16	2.303509286	0.891623508	1	0	1 WT
55	65	4240	3	19	67	0:00:15-0:00:16	16	0.1	HET	12:53.0	8.56519	8.56522	0.1HET	16	1.151475286	0.751492317	1	1	1 HET
56	66	4306	3	20	68	0:00:15-0:00:16	16	0.1	HOM	12:53.0	7.20799	7.20802	0.1HOM	16	2.768492857	1.01899573	1	1	1 HOM
57	67	4372	3	21	69	0:00:15-0:00:16	16	0.1	WT	12:53.0	4.98504	4.98506	0.1WT	16	1.072808029	0.562184755	1	1	1 WT
58	68	4438	3	22	70	0:00:15-0:00:16	16	0.1	HET	12:53.0	3.98307	3.98309	0.1HET	16	0.227902286	0.060786418	1	0	1 HET
59	69	4504	3	23	71	0:00:15-0:00:16	16	0.1	HOM	12:53.0	4.47096	4.47098	0.1HOM	16	3.34447	0.908484292	1	0	1 HOM
60	70	4570	3	24	72	0:00:15-0:00:16	16	0.1	WT	12:53.0	8.39414	8.39416	0.1WT	16	7.063839571	7.201228625	1	1	1 WT
61	71	4636	4	1	73	0:00:15-0:00:16	16	0.1	HOM	12:54.0	4.17255	4.17257	0.1HOM	16	1.239805286	0.81827793	1	0	1 HOM
62	72	4702	4	2	74	0:00:15-0:00:16	16	0.1	WT	12:54.0	3.62091	3.62092	0.1WT	16	2.987192857	0.904824624	1	0	1 WT
63	74	4834	4	4	76	0:00:15-0:00:16	16	0.1	HOM	12:54.0	4.29556	4.29557	0.1HOM	16	3.209058571	1.269733628	1	0	1 HOM
64	76	4966	4	6	78	0:00:15-0:00:16	16	0.1	HET	12:54.0	5.18086	6.09517	0.1HET	16	0	0	1	1	1 HET
65	77	5032	4	7	79	0:00:15-0:00:16	16	0.05	HOM	12:54.0	9.56848	9.56852	0.05HOM	16	2.538768	1.595403351	1	1	1 HOM
66	80	5230	4	10	82	0:00:15-0:00:16	16	0.05	HOM	12:54.0	4.69565	4.69567	0.05HOM	16	0.240877429	0.057594612	1	1	1 HOM
67	83	5428	4	13	85	0:00:15-0:00:16	16	0	HOM	12:54.0	6.69189	6.69192	0.0-HOM	16	2.564042	1.406434787	1	1	1 HOM
68	84	5494	4	14	86	0:00:15-0:00:16	16	0	WT	12:54.0	4.00452	4.00453	0.0-WT	16	1.277219143	0.967451176	1	0	1 WT
69	86	5626	4	16	88	0:00:15-0:00:16	16	0	HOM	12:54.0	7.18182	7.18185	0.0-HOM	16	1.896747857	0.870392183	1	1	1 HOM
70	87	5692	4	17	89	0:00:15-0:00:16	16	0	WT	12:54.0	5.72794	5.72796	0.0-WT	16	2.189688571	0.744186359	1	1	1 WT
71	89	5824	4	19	91	0:00:15-0:00:16	16	0.5	HOM	12:54.0	3.06249	3.06251	0.5HOM	16	4.468614286	1.607349606	1	0	1 HOM
72	90	5890	4	20	92	0:00:15-0:00:16	16	0.5	WT	12:54.0	6.66931	6.66934	0.5WT	16	1.322670429	0.693460368	1	1	1 WT
73	91	5956	4	21	93	0:00:15-0:00:16	16	0.5	HET	12:54.0	3.85336	3.85337	0.5HET	16	1.736251	0.736099733	1	0	1 HET
74	92	6022	4	22	94	0:00:15-0:00:16	16	0.5	HOM	12:54.0	4.0219	4.02192	0.5HOM	16	1.891154	1.162973448	1	0	1 HOM
75	93	6088	4	23	95	0:00:15-0:00:16	16	0.5	WT	12:54.0	6.57672	6.57675	0.5WT	16	1.593217571	1.635678836	1	1	1 WT
76	94	6154	5	1	97	0:00:15-0:00:16	16	0	WT	12:56.0	4.67643	4.67645	0.0-WT	16	1.716623857	0.652471014	1	1	1 WT
77	96	6286	5	3	99	0:00:15-0:00:16	16	0	HOM	12:56.0	2.80181	2.80182	0.0-HOM	16	3.645612857	1.155423266	1	0	1 HOM
78	97	6352	5	4	100	0:00:15-0:00:16	16	0	WT	12:56.0	5.72217	5.72219	0.0-WT	16	2.620526857	2.176612002	1	1	1 WT
79	98	6418	5	5	101	0:00:15-0:00:16	16	0	HET	12:56.0	1.05644	1.05644	0.0-HET	16	2.833251429	1.011953987	1	0	1 HET
80	99	6484	5	6	102	0:00:15-0:00:16	16	0	HOM	12:56.0	5.37853	5.37856	0.0-HOM	16	1.614774571	0.634151218	1	1	1 HOM
81	100	6550	5	7	103	0:00:15-0:00:16	16	0.05	WT	12:56.0	4.08685	4.08687	0.05WT	16	1.468153	1.278960247	1	0	1 WT
82	101	6616	5	8	104	0:00:15-0:00:16	16	0.05	HET	12:56.0	6.84061	6.84064	0.05HET	16	2.773088571	0.84732286	1	1	1 HET
83	102	6682	5	9	105	0:00:15-0:00:16	16	0.05	HOM	12:56.0	1.12517	1.12518	0.05HOM	16	0.521379143	0.04503448	1	0	1 HOM
84	103	6748	5	10	106	0:00:15-0:00:16	16	0.05	WT	12:56.0	8.48417	8.48421	0.05WT	16	1.632159	1.227781197	1	1	1 WT
85	104	6814	5	11	107	0:00:15-0:00:16	16	0.05	HET	12:56.0	4.64675	4.64677	0.05HET	16	1.499028857	0.825314053	1	1	1 HET
86	105	6880	5	12	108	0:00:15-0:00:16	16	0.05	HOM	12:56.0	2.96802	2.96802	0.05HOM	16	2.040175429	1.276707416	1	0	1 HOM
87	106	6946	5	13	109	0:00:15-0:00:16	16	0.1	WT	12:56.0	4.18719	4.18721	0.1WT	16	0.516920286	0.803320354	1	0	1 WT
88	107	7012	5	14	110	0:00:15-0:00:16	16	0.1	HET	12:56.0	8.11456	8.11459	0.1HET	16	2.105871429	0.678338778	1	1	1 HET
89	109	7144	5	16	112	0:00:15-0:00:16	16	0.1	WT	12:56.0	7.54827	7.5483	0.1WT	16	1.610134143	0.640268018	1	1	1 WT
90	110	7210	5	17	113	0:00:15-0:00:16	16	0.1	HET	12:56.0	4.26043	4.26044	0.1HET	16	2.140899857	1.165151366	1	0	1 HET
91	111	7276	5	18	114	0:00:15-0:00:16	16	0.1	HOM	12:56.0	7.13131	7.13134	0.1HOM	16	0.853213329	1.085359375	1	1	1 HOM
92	112	7342	5	19	115	0:00:15-0:00:16	16	0.5	WT	12:56.0	6.26109	6.26112	0.5WT	16	1.074989857	0.83624439	1	1	1 WT
93	113	7408	5	20	116	0:00:15-0:00:16	16	0.5	HET	12:56.0	5.20683	5.20685	0.5HET	16	1.219901143	1.093669556	1	1	1 HET
94	114	7474	5	21	117	0:00:15-0:00:16	16	0.5	HOM	12:56.0	5.31294	5.31296	0.5HOM	16	2.332858857	1.804969231	1	1	1 HOM
95	115	7540	5	22	118	0:00:15-0:00:16	16	0.5	WT	12:56.0	0.121384	0.121384	0.5WT	16	1.255830857	0.712211479	1	0	1 WT
96	116	7606	5	23	119	0:00:15-0:00:16	16	0.5	HET	12:56.0	0.57475	0.574751	0.5HET	16	1.853874143	0.699755011	1	0	1 HET
97	117	7672	5	24	120	0:00:15-0:00:16	16	0.5	HOM	12:56.0	5.46666	5.46669	0.5HOM	16	2.094971714	1.095230673	1	1	1 HOM
98	119	7804	6	2	122	0:00:15-0:00:16	16	0.5	HET	12:57.0	6.13598	6.136	0.5HET	16	2.626486429	1.298223294	1	1	1 HET
99	120	7870	6	3	123	0:00:15-0:00:16	16	0.5	WT	12:57.0	7.51363	7.51366	0.5WT	16	2.567537143	1.160752961	1	1	1 WT
100	121	7936	6	4	124	0:00:15-0:00:16	16	0.5	HOM	12:57.0	8.52927	8.52931	0.5HOM	16	0.112247029	0.051276989	1	1	1 HOM
101	122	8002	6	5	125	0:00:15-0:00:16	16	0.5	HET	12:57.0	5.08094	5.08095	0.5HET	16	0.785613857	0.698682185	1	1	1 HET
102	123	8068	6	6	126	0:00:15-0:00:16	16	0.5	WT	12:57.0	6.14551	6.14553	0.5WT	16	2.401295143	1.220302752	1	1	1 WT
103	125	8200	6	8	128	0:00:15-0:00:16	16	0.1	HET	12:57.0	7.78778	7.78781	0.1HET	16	1.948756857	1.208198692	1	1	1 HET
104	126	8266	6	9	129	0:00:15-0:00:16	16	0.1	WT	12:57.0	5.69701	5.69703	0.1WT	16	0.889315614	0.999745766	1	1	1 WT
105	129	8464	6	12	132	0:00:15-0:00:16	16	0.1	WT	12:57.0	4.77214	4.77216	0.1WT	16	2.448341143	1.392994021	1	1	1 WT
106	130	8530	6	13	133	0:00:15-0:00:16	16	0.05	HOM	12:57.0	7.37243	7.37246	0.05HOM	16	2.905667429	2.234423083	1	1	1 HOM
107	131	8596	6	14	134	0:00:15-0:00:16	16	0.05	HET	12:57.0	4.774	4.77401	0.05HET	16	1.656211857	0.83480597	1	1	1 HET
108	132	8662	6	15	135	0:00:15-0:00:16	16	0.05	WT	12:57.0	7.72559	7.72562	0.05WT	16	1.138593143	0.722972032	1	1	1 WT
109	133	8728	6	16	136	0:00:15-0:00:16	16	0.05	HOM	12:57.0	5.31858	5.31861	0.05HOM	16	3.539044286	1.725730185	1	1	1 HOM
110	134	8794	6	17	137	0:00:15-0:00:16	16	0.05	HET	12:57.0	4.86656	4.86658	0.05HET	16	1.554092	1.688855217	1	1	1 HET
111	135	8860	6	18	138	0:00:15-0:00:16	16	0.05	WT	12:57.0	4.1305	4.13052	0.05WT	16	0.647834571	0.475049033	1	0	1 WT
112	137	8992	6	20	140	0:00:15-0:00:16	16	0	HET	12:57.0	2.82566	2.82567	0.0-HET	16	1.231204429	0.633436139	1	0	1 HET
113	139	9124	6	22	142	0:00:15-0:00:16	16	0	HOM	12:57.0	5.98619	5.98621	0.0-HOM	16	0.207687757	0.114345154	1	1	1 HOM
114	140	9190	6	23	143	0:00:15-0:00:16	16	0	HET	12:57.0	4.83189	4.83191	0.0-HET	16	0.375648571	0.323850098	1	1	1 HET
115	141	9256	7	1	145	0:00:15-0:00:16	16	0.05	HET	12:58.0	2.37411	2.37412	0.05HET	16	2.978892857	1.929675987	1	0	1 HET
116	144	9454	7	4	148	0:00:15-0:00:16	16	0.05	HET	12:58.0	8.79266	10.1454	0.05HET	16	0	0	1	1	1 HET
117	145	9520	7	5	149	0:00:15-0:00:16	16	0.05	HOM	12:58.0	3.99974	3.99976	0.05HOM	16	3.878628571	1.449574306	1	0	1 HOM
118	146	9586	7	6	150	0:00:15-0:00:16	16	0.05	WT	12:58.0	4.75188	4.75191	0.05WT	16	2.184584286	0.975753038	1	1	1 WT
119	150	9850	7	14	158	0:00:15-0:00:16	16	0.5	HOM	12:58.0	6.00511	6.00513	0.5HOM	16	2.723723571	1.210933561	1	1	1 HOM
120	151	9916	7	15	159	0:00:15-0:00:16	16	0.5	WT	12:58.0	3.97533	3.97535	0.5WT	16	1.880752	1.51448201	1	0	1 WT
121	152	9982	7	16	160	0:00:15-0:00:16	16	0.5	HET	12:58.0	7.00304	7.00307	0.5HET	16	2.221199	1.880551301	1	1	1 HET
122	156	10246	7	20	164	0:00:15-0:00:16	16	0.1	HOM	12:58.0	6.94512	6.94515	0.1HOM	16	3.903469857	4.587065004	1	1	1 HOM
123	157	10312	7	21	165	0:00:15-0:00:16	16	0.1	WT	12:58.0	4.99963	4.99965	0.1WT	16	2.886608714	2.935351973	1	1	1 WT
124	158	10378	7	22	166	0:00:15-0:00:16	16	0.1	HET	12:58.0	2.27601	2.27602	0.1HET	16	1.800143286	2.223983673	1	0	1 HET
125	159	10444	7	23	167	0:00:15-0:00:16	16	0.1	HOM	12:58.0	10.8713	10.8713	0.1HOM	16	1.021409429	1.071840721	1	1	1 HOM
126	160	10510	8	1	169	0:00:15-0:00:16	16	0.1	HOM	12:59.0	2.91482	2.91483	0.1HOM	16	1.593846714	0.846523033	1	0	1 HOM
127	161	10576	8	2	170	0:00:15-0:00:16	16	0.1	WT	12:59.0	1.68145	2.24195	0.1WT	16	0.109340143	0.289286826	1	0	1 WT
128	162	10642	8	3	171	0:00:15-0:00:16	16	0.1	HET	12:59.0	6.53669	6.53671	0.1HET	16	0.650460286	0.761144844	1	1	1 HET
129	163	10708	8	4	172	0:00:15-0:00:16	16	0.1	HOM	12:59.0	6.72386	6.72389	0.1HOM	16	2.855192714	1.342471596	1	1	1 HOM
130	165	10840	8	6	174	0:00:15-0:00:16	16	0.1	HET	12:59.0	7.29777	7.2978	0.1HET	16	0.949679357	0.80002752	1	1	1 HET
131	166	10906	8	7	175	0:00:15-0:00:16	16	0.05	HOM	12:59.0	4.6274	4.62741	0.05HOM	16	0.897638971	0.799453368	1	1	1 HOM
132	167	10972	8	8	176	0:00:15-0:00:16	16	0.05	WT	12:59.0	7.40161	7.40164	0.05WT	16	2.116546286	1.467558586	1	1	1 WT
133	168	11038	8	9	177	0:00:15-0:00:16	16	0.05	HET	12:59.0	2.86456	2.86457	0.05HET	16	0.316620429	0.223434385	1	0	1 HET
134	169	11104	8	10	178	0:00:15-0:00:16	16	0.05	HOM	12:59.0	5.51039	5.5104	0.05HOM	16	1.503959286	1.005175263	1	1	1 HOM
135	170	11170	8	11	179	0:00:15-0:00:16	16	0.05	WT	12:59.0	6.2388	6.23882	0.05WT	16	2.57616	1.577066033	1	1	1 WT
136	171	11236	8	12	180	0:00:15-0:00:16	16	0.05	HET	12:59.0	9.67117	9.67121	0.05HET	16	1.980208571	0.743320723	1	1	1 HET
137	172	11302	8	13	181	0:00:15-0:00:16	16	0	HOM	12:59.0	3.61603	3.61604	0.0-HOM	16	3.778705714	1.633009605	1	0	1 HOM
138	173	11368	8	14	182	0:00:15-0:00:16	16	0	WT	12:59.0	8.34921	8.34924	0.0-WT	16	1.225098857	0.944735915	1	1	1 WT
139	175	11500	8	16	184	0:00:15-0:00:16	16	0	HOM	12:59.0	9.40729	9.40733	0.0-HOM	16	2.340171429	1.221215019	1	1	1 HOM
140	176	11566	8	17	185	0:00:15-0:00:16	16	0	WT	12:59.0	5.58256	5.58258	0.0-WT	16	1.336164	0.994194907	1	1	1 WT
141	177	11632	8	19	187	0:00:15-0:00:16	16	0.5	HOM	12:59.0	0.082926	0.0975607	0.5HOM	16	0	0	1	0	1 HOM
142	178	11698	8	20	188	0:00:15-0:00:16	16	0.5	WT	12:59.0	9.06683	9.06687	0.5WT	16	2.919832857	0.713807585	1	1	1 WT
143	179	11764	8	21	189	0:00:15-0:00:16	16	0.5	HET	12:59.0	3.70607	3.70608	0.5HET	16	0.132793171	0.023910874	1	0	1 HET
144	181	11896	8	23	191	0:00:15-0:00:16	16	0.5	WT	12:59.0	5.4193	5.41932	0.5WT	16	2.243468714	2.029499897	1	1	1 WT
145	182	11962	8	24	192	0:00:15-0:00:16	16	0.5	HET	12:59.0	6.24304	6.24307	0.5HET	16	0.127662129	0.067692967	1	1	1 HET
146	186	12226	9	4	196	0:00:15-0:00:16	16	0	WT	13:00.0	8.30937	8.3094	0.0-WT	16	0.955870286	0.773719706	1	1	1 WT
147	187	12292	9	5	197	0:00:15-0:00:16	16	0	HET	13:00.0	7.86317	7.8632	0.0-HET	16	1.379209714	0.955976944	1	1	1 HET
148	188	12358	9	6	198	0:00:15-0:00:16	16	0	HOM	13:00.0	5.4904	5.49043	0.0-HOM	16	0.175336	0.256626328	1	1	1 HOM
149	189	12424	9	7	199	0:00:15-0:00:16	16	0.05	WT	13:00.0	6.67659	6.67662	0.05WT	16	2.667998571	1.064283782	1	1	1 WT
150	190	12490	9	8	200	0:00:15-0:00:16	16	0.05	HET	13:00.0	9.62253	9.62257	0.05HET	16	1.921692714	1.718362006	1	1	1 HET
151	191	12556	9	10	202	0:00:15-0:00:16	16	0.05	WT	13:00.0	9.55341	9.55345	0.05WT	16	3.557647143	1.465747329	1	1	1 WT
152	192	12622	9	11	203	0:00:15-0:00:16	16	0.05	HET	13:00.0	6.95932	6.95935	0.05HET	16	0.203747286	0.063253295	1	1	1 HET
153	193	12688	9	12	204	0:00:15-0:00:16	16	0.05	HOM	13:00.0	6.00483	6.00485	0.05HOM	16	2.032254	1.269137455	1	1	1 HOM
154	194	12754	9	13	205	0:00:15-0:00:16	16	0.1	WT	13:00.0	9.82599	9.82603	0.1WT	16	1.968111	1.479421564	1	1	1 WT
155	195	12820	9	14	206	0:00:15-0:00:16	16	0.1	HET	13:00.0	5.68427	5.68429	0.1HET	16	1.529421857	0.500326591	1	1	1 HET
156	197	12952	9	16	208	0:00:15-0:00:16	16	0.1	WT	13:00.0	4.09553	4.09555	0.1WT	16	1.411252143	0.769107686	1	0	1 WT
157	198	13018	9	17	209	0:00:15-0:00:16	16	0.1	HET	13:00.0	5.79131	5.79133	0.1HET	16	1.98885	0.747318271	1	1	1 HET
158	199	13084	9	18	210	0:00:15-0:00:16	16	0.1	HOM	13:00.0	8.36138	8.36142	0.1HOM	16	1.219181014	0.832128407	1	1	1 HOM
159	200	13150	9	19	211	0:00:15-0:00:16	16	0.5	WT	13:00.0	2.2031	2.20311	0.5WT	16	1.003829857	0.136115708	1	0	1 WT
160	202	13282	9	21	213	0:00:15-0:00:16	16	0.5	HOM	13:00.0	10.456	12.3012	0.5HOM	16	0	0	1	1	1 HOM
161	204	13414	9	23	215	0:00:15-0:00:16	16	0.5	HET	13:00.0	8.65958	8.65961	0.5HET	16	2.115048	0.958390913	1	1	1 HET
162	205	13480	9	24	216	0:00:15-0:00:16	16	0.5	HOM	13:00.0	8.21737	8.21741	0.5HOM	16	3.720442857	1.330477756	1	1	1 HOM
163	208	13678	10	3	219	0:00:15-0:00:16	16	0.5	WT	13:01.0	2.08572	2.08573	0.5WT	16	0.209971286	0.037172714	1	0	1 WT
164	210	13810	10	5	221	0:00:15-0:00:16	16	0.5	HET	13:01.0	4.50938	4.50939	0.5HET	16	1.844090857	0.983350064	1	0	1 HET
165	211	13876	10	6	222	0:00:15-0:00:16	16	0.5	WT	13:01.0	4.27813	4.93629	0.5WT	16	0	0	1	0	1 WT
166	213	14008	10	8	224	0:00:15-0:00:16	16	0.1	HET	13:01.0	0.610074	0.610076	0.1HET	16	0.546414714	0.403014291	1	0	1 HET
167	214	14074	10	9	225	0:00:15-0:00:16	16	0.1	WT	13:01.0	4.4168	4.41682	0.1WT	16	2.584802857	1.428263162	1	0	1 WT
168	215	14140	10	10	226	0:00:15-0:00:16	16	0.1	HOM	13:01.0	6.32964	6.32967	0.1HOM	16	2.879014357	4.5680578	1	1	1 HOM
169	219	14404	10	14	230	0:00:15-0:00:16	16	0.05	HET	13:01.0	6.65222	6.65225	0.05HET	16	2.604767143	0.948816529	1	1	1 HET
170	220	14470	10	15	231	0:00:15-0:00:16	16	0.05	WT	13:01.0	8.46424	8.46427	0.05WT	16	1.750391429	0.571549178	1	1	1 WT
171	221	14536	10	16	232	0:00:15-0:00:16	16	0.05	HOM	13:01.0	1.91325	1.91325	0.05HOM	16	0.325223686	0.318979473	1	0	1 HOM
172	222	14602	10	18	234	0:00:15-0:00:16	16	0.05	WT	13:01.0	1.83154	1.83154	0.05WT	16	2.8635	0.992887729	1	0	1 WT
173	223	14668	10	19	235	0:00:15-0:00:16	16	0	HOM	13:01.0	7.44193	7.44195	0.0-HOM	16	4.060644286	1.778421512	1	1	1 HOM
174	224	14734	10	20	236	0:00:15-0:00:16	16	0	HET	13:01.0	8.51012	8.51015	0.0-HET	16	0.911720857	0.63114733	1	1	1 HET
175	225	14800	10	21	237	0:00:15-0:00:16	16	0	WT	13:01.0	7.35495	7.35498	0.0-WT	16	2.444163143	2.074162919	1	1	1 WT
176	226	14866	10	22	238	0:00:15-0:00:16	16	0	HOM	13:01.0	4.79339	4.7934	0.0-HOM	16	1.955062857	0.990254499	1	1	1 HOM
177	227	14932	10	23	239	0:00:15-0:00:16	16	0	HET	13:01.0	4.08749	4.08752	0.0-HET	16	1.008678571	0.418522585	1	0	1 HET
178	228	14998	10	24	240	0:00:15-0:00:16	16	0	WT	13:01.0	2.06008	2.06009	0.0-WT	16	2.173942286	1.789427222	1	0	1 WT
179	229	15064	11	1	241	0:00:15-0:00:16	16	0.05	HET	13:03.0	2.11602	2.11603	0.05HET	16	2.911951286	2.38134668	1	0	1 HET
180	230	15130	11	2	242	0:00:15-0:00:16	16	0.05	HOM	13:03.0	1.41062	1.41062	0.05HOM	16	0.4094815	0.50135872	1	0	1 HOM
181	231	15196	11	3	243	0:00:15-0:00:16	16	0.05	WT	13:03.0	6.06604	6.06607	0.05WT	16	1.758758571	1.23806334	1	1	1 WT
182	232	15262	11	4	244	0:00:15-0:00:16	16	0.05	HET	13:03.0	6.42973	6.42976	0.05HET	16	2.925303143	1.145086292	1	1	1 HET
183	233	15328	11	5	245	0:00:15-0:00:16	16	0.05	HOM	13:03.0	6.61152	6.61155	0.05HOM	16	1.516169857	1.269282766	1	1	1 HOM
184	234	15394	11	6	246	0:00:15-0:00:16	16	0.05	WT	13:03.0	6.95525	6.95527	0.05WT	16	1.171690143	0.540371432	1	1	1 WT
185	235	15460	11	7	247	0:00:15-0:00:16	16	0	HET	13:03.0	4.11343	4.11344	0.0-HET	16	0.534916443	0.388884892	1	0	1 HET
186	236	15526	11	8	248	0:00:15-0:00:16	16	0	HOM	13:03.0	1.47738	1.47739	0.0-HOM	16	0.233586243	0.126148153	1	0	1 HOM
187	237	15592	11	9	249	0:00:15-0:00:16	16	0	WT	13:03.0	9.19423	10.6088	0.0-WT	16	0	0	1	1	1 WT
188	238	15658	11	10	250	0:00:15-0:00:16	16	0	HET	13:03.0	7.39697	7.397	0.0-HET	16	1.192299714	1.569545383	1	1	1 HET
189	239	15724	11	11	251	0:00:15-0:00:16	16	0	HOM	13:03.0	8.58634	8.58638	0.0-HOM	16	4.36581	3.033869983	1	1	1 HOM
190	240	15790	11	12	252	0:00:15-0:00:16	16	0	WT	13:03.0	4.42658	4.42659	0.0-WT	16	2.863136143	1.808829927	1	0	1 WT
191	241	15856	11	13	253	0:00:15-0:00:16	16	0.5	HET	13:03.0	4.84935	4.84935	0.5HET	16	0.603621714	0.113609504	1	1	1 HET
192	243	15988	11	15	255	0:00:15-0:00:16	16	0.5	WT	13:03.0	6.63671	6.63674	0.5WT	16	2.220864286	0.675086586	1	1	1 WT
193	244	16054	11	16	256	0:00:15-0:00:16	16	0.5	HET	13:03.0	4.90274	4.90275	0.5HET	16	2.40336	1.527346665	1	1	1 HET
194	245	16120	11	17	257	0:00:15-0:00:16	16	0.5	HOM	13:03.0	5.25599	5.25601	0.5HOM	16	3.940088571	2.473759295	1	1	1 HOM
195	246	16186	11	18	258	0:00:15-0:00:16	16	0.5	WT	13:03.0	6.73026	6.73029	0.5WT	16	2.534458857	1.562465359	1	1	1 WT
196	247	16252	11	19	259	0:00:15-0:00:16	16	0.1	HET	13:03.0	0.492296	0.492299	0.1HET	16	1.483819429	0.70327409	1	0	1 HET
197	249	16384	11	21	261	0:00:15-0:00:16	16	0.1	WT	13:03.0	0.733109	0.733112	0.1WT	16	0.058464801	0.094748498	1	0	1 WT
198	250	16450	11	22	262	0:00:15-0:00:16	16	0.1	HET	13:03.0	5.00348	5.0035	0.1HET	16	0.906252857	0.794057434	1	1	1 HET
199	251	16516	11	23	263	0:00:15-0:00:16	16	0.1	HOM	13:03.0	4.97363	4.97365	0.1HOM	16	1.382247857	0.297391816	1	1	1 HOM
200	252	16582	11	24	264	0:00:15-0:00:16	16	0.1	WT	13:03.0	5.90499	5.90502	0.1WT	16	1.829352286	1.141634119	1	1	1 WT
201	253	16648	12	1	265	0:00:15-0:00:16	16	0.1	HOM	13:03.0	2.28328	2.28329	0.1HOM	16	2.392802857	0.634858216	1	0	1 HOM
202	254	16714	12	2	266	0:00:15-0:00:16	16	0.1	WT	13:03.0	5.11202	5.11205	0.1WT	16	3.945447143	2.654153763	1	1	1 WT
203	255	16780	12	3	267	0:00:15-0:00:16	16	0.1	HET	13:03.0	4.05412	4.05413	0.1HET	16	1.208657714	0.720422302	1	0	1 HET
204	258	16978	12	6	270	0:00:15-0:00:16	16	0.1	HET	13:03.0	2.90911	2.90913	0.1HET	16	1.375691714	1.322622114	1	0	1 HET
205	260	17110	12	8	272	0:00:15-0:00:16	16	0.05	WT	13:03.0	3.66867	3.66869	0.05WT	16	2.837144286	0.901900947	1	0	1 WT
206	262	17242	12	11	275	0:00:15-0:00:16	16	0.05	WT	13:03.0	6.65191	6.65194	0.05WT	16	1.868566571	2.240733401	1	1	1 WT
207	264	17374	12	13	277	0:00:15-0:00:16	16	0	HOM	13:03.0	9.32575	9.32579	0.0-HOM	16	2.024857857	1.061040349	1	1	1 HOM
208	265	17440	12	14	278	0:00:15-0:00:16	16	0	WT	13:03.0	5.00151	5.00153	0.0-WT	16	3.012535143	2.027379406	1	1	1 WT
209	266	17506	12	15	279	0:00:15-0:00:16	16	0	HET	13:03.0	4.67935	4.67937	0.0-HET	16	0.243097857	0.064655057	1	1	1 HET
210	267	17572	12	16	280	0:00:15-0:00:16	16	0	HOM	13:03.0	1.05533	1.05533	0.0-HOM	16	0.309036571	0.056648521	1	0	1 HOM
211	268	17638	12	17	281	0:00:15-0:00:16	16	0	WT	13:03.0	1.26413	1.26414	0.0-WT	16	2.733588843	3.15679764	1	0	1 WT
212	271	17836	12	20	284	0:00:15-0:00:16	16	0.5	WT	13:03.0	9.43186	9.4319	0.5WT	16	2.579924286	0.920888844	1	1	1 WT
213	272	17902	12	21	285	0:00:15-0:00:16	16	0.5	HET	13:03.0	5.43052	5.43054	0.5HET	16	3.487605714	1.444416381	1	1	1 HET
214	274	18034	12	23	287	0:00:15-0:00:16	16	0.5	WT	13:03.0	5.40079	5.40081	0.5WT	16	1.560275857	0.86528225	1	1	1 WT
215	276	18166	1	1	1	0:00:15-0:00:16	16	0	WT	27:35.0	2.49464	2.49465	0.0-WT	16	0.801322781	0.673350202	1	0	1 WT
216	277	18232	1	2	2	0:00:15-0:00:16	16	0	HET	27:35.0	0.173243	0.173244	0.0-HET	16	0.163810429	0.064965735	1	0	1 HET
217	278	18298	1	3	3	0:00:15-0:00:16	16	0	HOM	27:35.0	10.1947	10.1947	0.0-HOM	16	2.488771143	1.164110607	1	1	1 HOM
218	279	18364	1	4	4	0:00:15-0:00:16	16	0	WT	27:35.0	3.64435	3.64436	0.0-WT	16	0.235994971	0.217527265	1	0	1 WT
219	280	18430	1	5	5	0:00:15-0:00:16	16	0	HET	27:35.0	0.215687	0.215688	0.0-HET	16	0.224115	0.036495489	1	0	1 HET
220	281	18496	1	6	6	0:00:15-0:00:16	16	0	HOM	27:35.0	4.12327	4.12329	0.0-HOM	16	0.505809371	0.26143492	1	0	1 HOM
221	282	18562	1	7	7	0:00:15-0:00:16	16	0.05	WT	27:35.0	10.1732	10.1732	0.05WT	16	1.892991	1.198148389	1	1	1 WT
222	283	18628	1	8	8	0:00:15-0:00:16	16	0.05	HET	27:35.0	5.92375	5.92377	0.05HET	16	2.039051429	1.755701919	1	1	1 HET
223	285	18760	1	10	10	0:00:15-0:00:16	16	0.05	WT	27:35.0	7.02224	7.02227	0.05WT	16	4.268077143	2.122971174	1	1	1 WT
224	286	18826	1	11	11	0:00:15-0:00:16	16	0.05	HET	27:35.0	6.12448	6.1245	0.05HET	16	0.301975243	0.146940013	1	1	1 HET
225	287	18892	1	12	12	0:00:15-0:00:16	16	0.05	HOM	27:35.0	1.83828	1.83829	0.05HOM	16	1.935541286	1.193304716	1	0	1 HOM
226	292	19222	1	17	17	0:00:15-0:00:16	16	0.1	HET	27:35.0	4.4597	4.45972	0.1HET	16	1.933311429	0.46450913	1	0	1 HET
227	293	19288	1	18	18	0:00:15-0:00:16	16	0.1	HOM	27:35.0	3.39541	3.39542	0.1HOM	16	1.292337286	0.717589688	1	0	1 HOM
228	295	19420	1	21	21	0:00:15-0:00:16	16	0.5	HOM	27:35.0	7.73321	7.73324	0.5HOM	16	3.443564286	1.917945882	1	1	1 HOM
229	296	19486	1	22	22	0:00:15-0:00:16	16	0.5	WT	27:35.0	3.22807	3.22808	0.5WT	16	0.274021571	0.106959045	1	0	1 WT
230	298	19618	1	24	24	0:00:15-0:00:16	16	0.5	HOM	27:35.0	8.14089	8.14092	0.5HOM	16	2.740044286	1.10133717	1	1	1 HOM
231	299	19684	2	1	25	0:00:15-0:00:16	16	0.5	HOM	32:40.0	7.19422	7.19425	0.5HOM	16	1.538928957	1.121068475	1	1	1 HOM
232	301	19816	2	3	27	0:00:15-0:00:16	16	0.5	WT	32:40.0	6.70018	6.7002	0.5WT	16	1.933544286	0.539906297	1	1	1 WT
233	302	19882	2	4	28	0:00:15-0:00:16	16	0.5	HOM	32:40.0	7.15911	7.15915	0.5HOM	16	1.2246762	1.122929069	1	1	1 HOM
234	304	20014	2	6	30	0:00:15-0:00:16	16	0.5	WT	32:40.0	2.91509	2.9151	0.5WT	16	1.760221429	1.50419859	1	0	1 WT
235	305	20080	2	7	31	0:00:15-0:00:16	16	0.1	HOM	32:40.0	7.92121	7.92125	0.1HOM	16	1.123118143	0.992475164	1	1	1 HOM
236	307	20212	2	9	33	0:00:15-0:00:16	16	0.1	WT	32:40.0	2.84996	2.84997	0.1WT	16	0.077457057	0.018130441	1	0	1 WT
237	308	20278	2	10	34	0:00:15-0:00:16	16	0.1	HOM	32:40.0	8.82516	8.8252	0.1HOM	16	2.768916429	1.993770189	1	1	1 HOM
238	310	20410	2	12	36	0:00:15-0:00:16	16	0.1	WT	32:40.0	1.36408	1.36408	0.1WT	16	0.060666271	0.029478073	1	0	1 WT
239	311	20476	2	13	37	0:00:15-0:00:16	16	0.05	HOM	32:40.0	5.0377	5.03772	0.05HOM	16	2.060246571	1.726436057	1	1	1 HOM
240	313	20608	2	17	41	0:00:15-0:00:16	16	0.05	HET	32:40.0	2.82642	2.82643	0.05HET	16	0.543101886	0.355257238	1	0	1 HET
241	314	20674	2	18	42	0:00:15-0:00:16	16	0.05	WT	32:40.0	3.97044	3.97046	0.05WT	16	1.550958286	1.098421085	1	0	1 WT
242	315	20740	2	19	43	0:00:15-0:00:16	16	0	HOM	32:40.0	5.94671	5.94674	0.0-HOM	16	1.119408286	0.788965624	1	1	1 HOM
243	316	20806	2	20	44	0:00:15-0:00:16	16	0	HET	32:40.0	4.87036	4.87038	0.0-HET	16	2.934715714	0.639889361	1	1	1 HET
244	317	20872	2	21	45	0:00:15-0:00:16	16	0	WT	32:40.0	8.92792	8.92796	0.0-WT	16	3.699627143	2.272381261	1	1	1 WT
245	318	20938	2	22	46	0:00:15-0:00:16	16	0	HOM	32:40.0	1.79838	1.79839	0.0-HOM	16	1.572600714	1.184943005	1	0	1 HOM
246	319	21004	2	23	47	0:00:15-0:00:16	16	0	HET	32:40.0	10.7083	10.7084	0.0-HET	16	2.357226286	1.315801173	1	1	1 HET
247	320	21070	2	24	48	0:00:15-0:00:16	16	0	WT	32:40.0	0.809736	1.10419	0.0-WT	16	0	0	1	0	1 WT
248	322	21202	3	2	50	0:00:15-0:00:16	16	0.05	HOM	34:27.0	6.97802	6.97805	0.05HOM	16	0.647376	0.584247193	1	1	1 HOM
249	323	21268	3	3	51	0:00:15-0:00:16	16	0.05	WT	34:27.0	2.51871	2.51872	0.05WT	16	0.341070286	0.133718853	1	0	1 WT
250	324	21334	3	4	52	0:00:15-0:00:16	16	0.05	HET	34:27.0	8.70239	8.70243	0.05HET	16	0.706166143	0.242854386	1	1	1 HET
251	325	21400	3	5	53	0:00:15-0:00:16	16	0.05	HOM	34:27.0	7.88277	7.88281	0.05HOM	16	2.345938143	1.274259289	1	1	1 HOM
252	328	21598	3	8	56	0:00:15-0:00:16	16	0	HOM	34:27.0	9.99679	9.99683	0.0-HOM	16	1.570321714	1.186172665	1	1	1 HOM
253	329	21664	3	9	57	0:00:15-0:00:16	16	0	WT	34:27.0	8.12454	8.12457	0.0-WT	16	1.078725386	0.90602774	1	1	1 WT
254	331	21796	3	11	59	0:00:15-0:00:16	16	0	HOM	34:27.0	2.25507	2.25508	0.0-HOM	16	1.684990714	0.68590983	1	0	1 HOM
255	332	21862	3	12	60	0:00:15-0:00:16	16	0	WT	34:27.0	5.85901	5.85903	0.0-WT	16	0.266722586	0.088479771	1	1	1 WT
256	333	21928	3	13	61	0:00:15-0:00:16	16	0.5	HET	34:27.0	1.38441	1.59739	0.5HET	16	0	0	1	0	1 HET
257	334	21994	3	14	62	0:00:15-0:00:16	16	0.5	HOM	34:27.0	5.17479	5.17481	0.5HOM	16	3.065151	2.623836642	1	1	1 HOM
258	335	22060	3	15	63	0:00:15-0:00:16	16	0.5	WT	34:27.0	6.10192	6.10194	0.5WT	16	1.369665714	2.05538301	1	1	1 WT
259	336	22126	3	16	64	0:00:15-0:00:16	16	0.5	HET	34:27.0	7.38198	7.38201	0.5HET	16	2.412841429	1.000146156	1	1	1 HET
260	337	22192	3	17	65	0:00:15-0:00:16	16	0.5	HOM	34:27.0	6.74684	6.74686	0.5HOM	16	1.022981286	0.8599461	1	1	1 HOM
261	339	22324	3	19	67	0:00:15-0:00:16	16	0.1	HET	34:27.0	2.38525	3.11121	0.1HET	16	0.257138	0.374345331	1	0	1 HET
262	341	22456	3	21	69	0:00:15-0:00:16	16	0.1	WT	34:27.0	4.78431	4.78433	0.1WT	16	0.408891043	0.400085247	1	1	1 WT
263	342	22522	3	22	70	0:00:15-0:00:16	16	0.1	HET	34:27.0	6.91597	6.916	0.1HET	16	3.091085286	1.921785279	1	1	1 HET
264	343	22588	3	23	71	0:00:15-0:00:16	16	0.1	HOM	34:27.0	3.2683	3.69999	0.1HOM	16	0	0	1	0	1 HOM
265	344	22654	3	24	72	0:00:15-0:00:16	16	0.1	WT	34:27.0	6.34168	6.34171	0.1WT	16	1.942092857	0.980518744	1	1	1 WT
266	345	22720	4	1	73	0:00:15-0:00:16	16	0.1	HOM	34:29.0	8.64074	8.64078	0.1HOM	16	2.416478286	1.132929452	1	1	1 HOM
267	346	22786	4	3	75	0:00:15-0:00:16	16	0.1	HET	34:29.0	7.26918	7.26921	0.1HET	16	2.678828571	0.912992859	1	1	1 HET
268	347	22852	4	4	76	0:00:15-0:00:16	16	0.1	HOM	34:29.0	2.74911	2.74912	0.1HOM	16	1.409958429	0.69717685	1	0	1 HOM
269	348	22918	4	5	77	0:00:15-0:00:16	16	0.1	WT	34:29.0	5.69113	5.69115	0.1WT	16	0.185796757	0.061208163	1	1	1 WT
270	349	22984	4	6	78	0:00:15-0:00:16	16	0.1	HET	34:29.0	3.90809	3.90811	0.1HET	16	1.293036571	0.87054493	1	0	1 HET
271	350	23050	4	7	79	0:00:15-0:00:16	16	0.05	HOM	34:29.0	7.92093	9.13956	0.05HOM	16	0	0	1	1	1 HOM
272	351	23116	4	8	80	0:00:15-0:00:16	16	0.05	WT	34:29.0	2.83113	2.83114	0.05WT	16	0.251510857	0.081753992	1	0	1 WT
273	352	23182	4	9	81	0:00:15-0:00:16	16	0.05	HET	34:29.0	8.22168	8.22171	0.05HET	16	3.177642857	0.803406579	1	1	1 HET
274	353	23248	4	10	82	0:00:15-0:00:16	16	0.05	HOM	34:29.0	0.528502	0.528507	0.05HOM	16	1.755331714	0.810469759	1	0	1 HOM
275	357	23512	4	14	86	0:00:15-0:00:16	16	0	WT	34:29.0	4.94524	4.94526	0.0-WT	16	3.632434286	1.566236106	1	1	1 WT
276	358	23578	4	15	87	0:00:15-0:00:16	16	0	HET	34:29.0	4.62156	4.62158	0.0-HET	16	0.601811571	0.490743471	1	1	1 HET
277	359	23644	4	17	89	0:00:15-0:00:16	16	0	WT	34:29.0	6.32693	6.32696	0.0-WT	16	1.522209	0.981357487	1	1	1 WT
278	360	23710	4	18	90	0:00:15-0:00:16	16	0	HET	34:29.0	1.96679	1.9668	0.0-HET	16	1.577842571	0.951897102	1	0	1 HET
279	361	23776	4	19	91	0:00:15-0:00:16	16	0.5	HOM	34:29.0	2.84326	2.84327	0.5HOM	16	1.487772	1.748051726	1	0	1 HOM
280	363	23908	4	21	93	0:00:15-0:00:16	16	0.5	HET	34:29.0	9.17435	9.17439	0.5HET	16	1.641836286	1.098903873	1	1	1 HET
281	364	23974	4	22	94	0:00:15-0:00:16	16	0.5	HOM	34:29.0	0.710154	0.710158	0.5HOM	16	0.192014857	0.045201036	1	0	1 HOM
282	365	24040	4	23	95	0:00:15-0:00:16	16	0.5	WT	34:29.0	7.29815	7.29817	0.5WT	16	0.487945286	0.556373516	1	1	1 WT
283	366	24106	4	24	96	0:00:15-0:00:16	16	0.5	HET	34:29.0	3.04854	3.65827	0.5HET	16	0	0	1	0	1 HET
284	367	24172	5	2	98	0:00:15-0:00:16	16	0	HET	34:30.0	1.3915	1.60557	0.0-HET	16	0	0	1	0	1 HET
285	368	24238	5	3	99	0:00:15-0:00:16	16	0	HOM	34:30.0	5.01779	5.01781	0.0-HOM	16	1.844229143	0.865538789	1	1	1 HOM
286	370	24370	5	8	104	0:00:15-0:00:16	16	0.05	HET	34:30.0	4.34672	5.01545	0.05HET	16	0	0	1	0	1 HET
287	372	24502	5	11	107	0:00:15-0:00:16	16	0.05	HET	34:30.0	4.90439	4.90441	0.05HET	16	2.445215286	2.63914923	1	1	1 HET
288	373	24568	5	12	108	0:00:15-0:00:16	16	0.05	HOM	34:30.0	4.23734	4.23735	0.05HOM	16	0.575410143	0.939186679	1	0	1 HOM
289	375	24700	5	14	110	0:00:15-0:00:16	16	0.1	HET	34:30.0	5.35406	5.35408	0.1HET	16	2.717921429	1.717109229	1	1	1 HET
290	376	24766	5	15	111	0:00:15-0:00:16	16	0.1	HOM	34:30.0	3.89113	3.89115	0.1HOM	16	1.323639429	1.024246744	1	0	1 HOM
291	378	24898	5	17	113	0:00:15-0:00:16	16	0.1	HET	34:30.0	2.44139	2.4414	0.1HET	16	0.478415657	0.859803719	1	0	1 HET
292	379	24964	5	18	114	0:00:15-0:00:16	16	0.1	HOM	34:30.0	9.25607	9.25611	0.1HOM	16	3.544155714	1.370413137	1	1	1 HOM
293	382	25162	5	21	117	0:00:15-0:00:16	16	0.5	HOM	34:30.0	8.37944	8.37947	0.5HOM	16	6.449035714	2.875613417	1	1	1 HOM
294	388	25558	6	3	123	0:00:15-0:00:16	16	0.5	WT	34:31.1	4.69023	4.69025	0.5WT	16	1.254090143	1.09461903	1	1	1 WT
295	390	25690	6	5	125	0:00:15-0:00:16	16	0.5	HET	34:31.1	6.79285	6.79288	0.5HET	16	5.548232857	2.621915632	1	1	1 HET
296	391	25756	6	6	126	0:00:15-0:00:16	16	0.5	WT	34:31.1	2.72859	2.7286	0.5WT	16	0.284694286	0.083926684	1	0	1 WT
297	394	25954	6	10	130	0:00:15-0:00:16	16	0.1	HOM	34:31.1	9.10198	9.10202	0.1HOM	16	2.222066286	1.250461419	1	1	1 HOM
298	396	26086	6	12	132	0:00:15-0:00:16	16	0.1	WT	34:31.1	0.0655759	0.0655763	0.1WT	16	0.123595614	0.081917985	1	0	1 WT
299	398	26218	6	14	134	0:00:15-0:00:16	16	0.05	HET	34:31.1	2.60156	2.60157	0.05HET	16	1.062497143	1.699373055	1	0	1 HET
300	402	26482	6	18	138	0:00:15-0:00:16	16	0.05	WT	34:31.1	8.93412	8.93416	0.05WT	16	1.961766286	1.142941225	1	1	1 WT
301	404	26614	6	20	140	0:00:15-0:00:16	16	0	HET	34:31.1	5.24858	5.24861	0.0-HET	16	2.683890286	3.117624921	1	1	1 HET
302	405	26680	6	21	141	0:00:15-0:00:16	16	0	WT	34:31.1	2.16777	2.16778	0.0-WT	16	2.749578571	1.04109058	1	0	1 WT
303	406	26746	6	22	142	0:00:15-0:00:16	16	0	HOM	34:31.1	5.53691	5.53693	0.0-HOM	16	3.459727143	0.906673772	1	1	1 HOM
304	407	26812	6	23	143	0:00:15-0:00:16	16	0	HET	34:31.1	4.89379	4.8938	0.0-HET	16	0.184876429	0.079722989	1	1	1 HET
305	408	26878	7	1	145	0:00:15-0:00:16	16	0.05	HET	34:32.1	2.84887	2.84889	0.05HET	16	0.225916143	0.066528201	1	0	1 HET
306	409	26944	7	2	146	0:00:15-0:00:16	16	0.05	HOM	34:32.1	10.1099	10.11	0.05HOM	16	4.149767143	1.545972407	1	1	1 HOM
307	410	27010	7	3	147	0:00:15-0:00:16	16	0.05	WT	34:32.1	10.0961	10.0961	0.05WT	16	2.430496157	1.809683959	1	1	1 WT
308	411	27076	7	4	148	0:00:15-0:00:16	16	0.05	HET	34:32.1	7.51663	7.51665	0.05HET	16	0.813561029	1.052858082	1	1	1 HET
309	415	27340	7	8	152	0:00:15-0:00:16	16	0	HOM	34:32.1	3.43712	3.96591	0.0-HOM	16	0	0	1	0	1 HOM
310	416	27406	7	9	153	0:00:15-0:00:16	16	0	WT	34:32.1	7.38103	7.38106	0.0-WT	16	3.54386	1.28892968	1	1	1 WT
311	417	27472	7	10	154	0:00:15-0:00:16	16	0	HET	34:32.1	9.64878	9.64882	0.0-HET	16	1.655349857	1.267898776	1	1	1 HET
312	418	27538	7	11	155	0:00:15-0:00:16	16	0	HOM	34:32.1	2.78887	2.78888	0.0-HOM	16	0.199838129	0.124432008	1	0	1 HOM
313	419	27604	7	12	156	0:00:15-0:00:16	16	0	WT	34:32.1	8.18665	8.18668	0.0-WT	16	4.741980057	3.860151174	1	1	1 WT
314	420	27670	7	13	157	0:00:15-0:00:16	16	0.5	HET	34:32.1	4.25993	4.25994	0.5HET	16	3.37518	1.86058891	1	0	1 HET
315	421	27736	7	14	158	0:00:15-0:00:16	16	0.5	HOM	34:32.1	2.82121	2.82122	0.5HOM	16	1.540955571	0.909651702	1	0	1 HOM
316	422	27802	7	15	159	0:00:15-0:00:16	16	0.5	WT	34:32.1	2.88628	3.39564	0.5WT	16	0	0	1	0	1 WT
317	427	28132	7	20	164	0:00:15-0:00:16	16	0.1	HOM	34:32.1	5.26266	5.26268	0.1HOM	16	3.098356286	2.045602584	1	1	1 HOM
318	428	28198	7	21	165	0:00:15-0:00:16	16	0.1	WT	34:32.1	7.23503	7.23507	0.1WT	16	2.629341571	1.186960434	1	1	1 WT
319	429	28264	7	23	167	0:00:15-0:00:16	16	0.1	HOM	34:32.1	2.61446	2.61447	0.1HOM	16	0.028962456	0.029281924	1	0	1 HOM
320	431	28396	8	1	169	0:00:15-0:00:16	16	0.1	HOM	34:33.1	6.78492	6.78494	0.1HOM	16	3.814302857	1.519407652	1	1	1 HOM
321	432	28462	8	2	170	0:00:15-0:00:16	16	0.1	WT	34:33.1	9.54051	9.54055	0.1WT	16	2.770008714	1.532825163	1	1	1 WT
322	433	28528	8	3	171	0:00:15-0:00:16	16	0.1	HET	34:33.1	3.1543	3.15431	0.1HET	16	1.997442571	1.292430549	1	0	1 HET
323	436	28726	8	6	174	0:00:15-0:00:16	16	0.1	HET	34:33.1	2.38568	2.38569	0.1HET	16	0.021256989	0.022598218	1	0	1 HET
324	437	28792	8	7	175	0:00:15-0:00:16	16	0.05	HOM	34:33.1	8.67017	8.67021	0.05HOM	16	1.422668286	0.881241427	1	1	1 HOM
325	439	28924	8	9	177	0:00:15-0:00:16	16	0.05	HET	34:33.1	7.30188	7.30191	0.05HET	16	2.265922857	0.876776458	1	1	1 HET
326	440	28990	8	10	178	0:00:15-0:00:16	16	0.05	HOM	34:33.1	7.4128	7.41283	0.05HOM	16	1.312080743	1.697046118	1	1	1 HOM
327	441	29056	8	11	179	0:00:15-0:00:16	16	0.05	WT	34:33.1	6.27761	6.27763	0.05WT	16	1.467365143	0.621054876	1	1	1 WT
328	442	29122	8	12	180	0:00:15-0:00:16	16	0.05	HET	34:33.1	5.08385	5.08387	0.05HET	16	1.558695571	0.824641664	1	1	1 HET
329	443	29188	8	13	181	0:00:15-0:00:16	16	0	HOM	34:33.1	8.30499	8.30503	0.0-HOM	16	5.120158571	1.610347867	1	1	1 HOM
330	444	29254	8	14	182	0:00:15-0:00:16	16	0	WT	34:33.1	6.274	6.27402	0.0-WT	16	2.417332	1.486829717	1	1	1 WT
331	445	29320	8	15	183	0:00:15-0:00:16	16	0	HET	34:33.1	5.65755	5.65757	0.0-HET	16	1.015548	0.636303845	1	1	1 HET
332	446	29386	8	16	184	0:00:15-0:00:16	16	0	HOM	34:33.1	5.03395	5.03397	0.0-HOM	16	0.432392	0.324637049	1	1	1 HOM
333	448	29518	8	18	186	0:00:15-0:00:16	16	0	HET	34:33.1	8.68784	8.68787	0.0-HET	16	3.167127571	1.983598426	1	1	1 HET
334	450	29650	8	20	188	0:00:15-0:00:16	16	0.5	WT	34:33.1	5.59076	5.59078	0.5WT	16	2.444854286	1.537210945	1	1	1 WT
335	451	29716	8	21	189	0:00:15-0:00:16	16	0.5	HET	34:33.1	3.01201	3.01202	0.5HET	16	0.129140057	0.032762746	1	0	1 HET
336	452	29782	8	22	190	0:00:15-0:00:16	16	0.5	HOM	34:33.1	5.03496	5.03498	0.5HOM	16	1.547141971	0.999582456	1	1	1 HOM
337	453	29848	8	24	192	0:00:15-0:00:16	16	0.5	HET	34:33.1	2.16114	2.16115	0.5HET	16	0.385851857	0.200748566	1	0	1 HET
338	454	29914	9	1	193	0:00:15-0:00:16	16	0	WT	34:34.9	8.28683	8.28686	0.0-WT	16	0.901733371	0.703988941	1	1	1 WT
339	455	29980	9	2	194	0:00:15-0:00:16	16	0	HET	34:34.9	8.62966	8.62969	0.0-HET	16	0.9946023	1.000491	1	1	1 HET
340	456	30046	9	3	195	0:00:15-0:00:16	16	0	HOM	34:34.9	1.68269	1.6827	0.0-HOM	16	0.6315102	0.697621427	1	0	1 HOM
341	457	30112	9	4	196	0:00:15-0:00:16	16	0	WT	34:34.9	5.83533	5.83535	0.0-WT	16	1.209239571	0.686007294	1	1	1 WT
342	459	30244	9	6	198	0:00:15-0:00:16	16	0	HOM	34:34.9	5.12303	5.12305	0.0-HOM	16	2.253341429	0.900267268	1	1	1 HOM
343	460	30310	9	7	199	0:00:15-0:00:16	16	0.05	WT	34:34.9	3.29872	3.29873	0.05WT	16	0.078666571	0.055942584	1	0	1 WT
344	462	30442	9	9	201	0:00:15-0:00:16	16	0.05	HOM	34:34.9	3.40724	3.40725	0.05HOM	16	0.593299	0.576721276	1	0	1 HOM
345	463	30508	9	10	202	0:00:15-0:00:16	16	0.05	WT	34:34.9	8.83415	8.83419	0.05WT	16	2.293651429	0.738786859	1	1	1 WT
346	464	30574	9	11	203	0:00:15-0:00:16	16	0.05	HET	34:34.9	5.16709	5.16711	0.05HET	16	2.159125714	1.058595804	1	1	1 HET
347	465	30640	9	12	204	0:00:15-0:00:16	16	0.05	HOM	34:34.9	4.46577	4.46578	0.05HOM	16	1.454590429	0.94206514	1	0	1 HOM
348	466	30706	9	13	205	0:00:15-0:00:16	16	0.1	WT	34:34.9	7.58233	7.58236	0.1WT	16	3.192831429	1.29712637	1	1	1 WT
349	467	30772	9	14	206	0:00:15-0:00:16	16	0.1	HET	34:34.9	2.38379	2.69864	0.1HET	16	0	0	1	0	1 HET
350	470	30970	9	17	209	0:00:15-0:00:16	16	0.1	HET	34:34.9	4.36164	4.36166	0.1HET	16	1.698455429	1.019392371	1	0	1 HET
351	472	31102	9	19	211	0:00:15-0:00:16	16	0.5	WT	34:34.9	10.4261	10.4262	0.5WT	16	0.168815186	0.211468692	1	1	1 WT
352	473	31168	9	20	212	0:00:15-0:00:16	16	0.5	HET	34:34.9	7.05951	7.05954	0.5HET	16	1.827406286	1.346898024	1	1	1 HET
353	474	31234	9	21	213	0:00:15-0:00:16	16	0.5	HOM	34:34.9	9.95784	9.95788	0.5HOM	16	2.0645427	2.61266204	1	1	1 HOM
354	475	31300	9	22	214	0:00:15-0:00:16	16	0.5	WT	34:34.9	4.73375	4.73377	0.5WT	16	5.686230286	3.112936483	1	1	1 WT
355	476	31366	9	23	215	0:00:15-0:00:16	16	0.5	HET	34:34.9	2.92597	2.92598	0.5HET	16	0.536598571	0.501509195	1	0	1 HET
356	480	31630	10	3	219	0:00:15-0:00:16	16	0.5	WT	34:35.1	1.47079	1.69707	0.5WT	16	0	0	1	0	1 WT
357	481	31696	10	4	220	0:00:15-0:00:16	16	0.5	HOM	34:35.1	7.41569	7.41572	0.5HOM	16	3.36153	1.835384988	1	1	1 HOM
358	482	31762	10	5	221	0:00:15-0:00:16	16	0.5	HET	34:35.1	4.24019	4.89253	0.5HET	16	0	0	1	0	1 HET
359	483	31828	10	6	222	0:00:15-0:00:16	16	0.5	WT	34:35.1	5.22288	5.2229	0.5WT	16	0.1996227	0.10616141	1	1	1 WT
360	484	31894	10	7	223	0:00:15-0:00:16	16	0.1	HOM	34:35.1	4.69336	4.69338	0.1HOM	16	2.784418571	1.202539475	1	1	1 HOM
361	485	31960	10	8	224	0:00:15-0:00:16	16	0.1	HET	34:35.1	0.076294	0.0762944	0.1HET	16	0.131135329	0.031674	1	0	1 HET
362	486	32026	10	10	226	0:00:15-0:00:16	16	0.1	HOM	34:35.1	1.90419	2.19715	0.1HOM	16	0	0	1	0	1 HOM
363	487	32092	10	11	227	0:00:15-0:00:16	16	0.1	HET	34:35.1	3.69062	4.25841	0.1HET	16	0	0	1	0	1 HET
364	488	32158	10	12	228	0:00:15-0:00:16	16	0.1	WT	34:35.1	6.95039	6.95042	0.1WT	16	2.160123714	1.322054693	1	1	1 WT
365	489	32224	10	13	229	0:00:15-0:00:16	16	0.05	HOM	34:35.1	0.69184	0.691843	0.05HOM	16	2.740012857	0.778581437	1	0	1 HOM
366	491	32356	10	15	231	0:00:15-0:00:16	16	0.05	WT	34:35.1	9.3474	9.34744	0.05WT	16	2.277127429	1.18636332	1	1	1 WT
367	492	32422	10	16	232	0:00:15-0:00:16	16	0.05	HOM	34:35.1	1.06778	1.06779	0.05HOM	16	2.402745286	1.323389434	1	0	1 HOM
368	493	32488	10	17	233	0:00:15-0:00:16	16	0.05	HET	34:35.1	10.5827	10.5827	0.05HET	16	1.579411714	0.629006572	1	1	1 HET
369	495	32620	10	19	235	0:00:15-0:00:16	16	0	HOM	34:35.1	3.21544	3.21545	0.0-HOM	16	1.747005429	0.661277608	1	0	1 HOM
370	497	32752	10	21	237	0:00:15-0:00:16	16	0	WT	34:35.1	2.4477	2.82427	0.0-WT	16	0	0	1	0	1 WT
371	500	32950	10	24	240	0:00:15-0:00:16	16	0	WT	34:35.1	9.5268	9.52684	0.0-WT	16	2.017896	1.008769424	1	1	1 WT
372	501	33016	11	1	241	0:00:15-0:00:16	16	0.05	HET	34:36.1	3	3.00001	0.05HET	16	2.491906143	1.034833251	1	0	1 HET
373	503	33148	11	4	244	0:00:15-0:00:16	16	0.05	HET	34:36.1	6.3915	6.39152	0.05HET	16	1.982193286	1.045205284	1	1	1 HET
374	504	33214	11	5	245	0:00:15-0:00:16	16	0.05	HOM	34:36.1	4.3932	4.39322	0.05HOM	16	1.484302429	2.007354846	1	0	1 HOM
375	505	33280	11	6	246	0:00:15-0:00:16	16	0.05	WT	34:36.1	2.6273	2.62731	0.05WT	16	2.205965857	1.121184338	1	0	1 WT
376	506	33346	11	7	247	0:00:15-0:00:16	16	0	HET	34:36.1	3.87179	3.8718	0.0-HET	16	2.369891429	1.138230861	1	0	1 HET
377	507	33412	11	8	248	0:00:15-0:00:16	16	0	HOM	34:36.1	7.15801	7.15804	0.0-HOM	16	3.690508571	2.043959196	1	1	1 HOM
378	508	33478	11	9	249	0:00:15-0:00:16	16	0	WT	34:36.1	8.6563	8.65633	0.0-WT	16	1.711349857	1.059908005	1	1	1 WT
379	509	33544	11	10	250	0:00:15-0:00:16	16	0	HET	34:36.1	10.7992	10.7992	0.0-HET	16	4.148462857	1.438116923	1	1	1 HET
380	511	33676	11	12	252	0:00:15-0:00:16	16	0	WT	34:36.1	4.5271	4.52711	0.0-WT	16	1.837219714	1.308639091	1	0	1 WT
381	512	33742	11	13	253	0:00:15-0:00:16	16	0.5	HET	34:36.1	9.00851	9.00854	0.5HET	16	3.386813143	1.874428883	1	1	1 HET
382	513	33808	11	14	254	0:00:15-0:00:16	16	0.5	HOM	34:36.1	8.60405	8.60408	0.5HOM	16	0.644066	0.513031796	1	1	1 HOM
383	514	33874	11	15	255	0:00:15-0:00:16	16	0.5	WT	34:36.1	4.28767	4.28768	0.5WT	16	2.784156857	2.41940726	1	0	1 WT
384	515	33940	11	16	256	0:00:15-0:00:16	16	0.5	HET	34:36.1	8.98583	8.98587	0.5HET	16	1.239999	0.577484894	1	1	1 HET
385	516	34006	11	17	257	0:00:15-0:00:16	16	0.5	HOM	34:36.1	1.57778	1.57778	0.5HOM	16	1.450888286	1.230211559	1	0	1 HOM
386	517	34072	11	18	258	0:00:15-0:00:16	16	0.5	WT	34:36.1	3.20418	3.20419	0.5WT	16	2.93749	1.678779889	1	0	1 WT
387	519	34204	11	20	260	0:00:15-0:00:16	16	0.1	HOM	34:36.1	4.54794	4.54796	0.1HOM	16	2.862536	1.660111318	1	0	1 HOM
388	520	34270	11	21	261	0:00:15-0:00:16	16	0.1	WT	34:36.1	5.08185	5.08187	0.1WT	16	1.903320714	1.223215164	1	1	1 WT
389	521	34336	11	22	262	0:00:15-0:00:16	16	0.1	HET	34:36.1	2.45951	2.45952	0.1HET	16	1.370316286	1.340278038	1	0	1 HET
390	522	34402	11	23	263	0:00:15-0:00:16	16	0.1	HOM	34:36.1	9.56432	9.56435	0.1HOM	16	3.991257143	1.440579495	1	1	1 HOM
391	524	34534	12	1	265	0:00:15-0:00:16	16	0.1	HOM		4.79104	4.79106	0.1HOM	16	1.566954857	1.572503193	1	1	1 HOM
392	525	34600	12	2	266	0:00:15-0:00:16	16	0.1	WT		5.9821	5.98213	0.1WT	16	1.073512	0.517390917	1	1	1 WT
393	526	34666	12	3	267	0:00:15-0:00:16	16	0.1	HET		3.35522	3.35523	0.1HET	16	2.683635714	1.455323755	1	0	1 HET
394	527	34732	12	4	268	0:00:15-0:00:16	16	0.1	HOM		6.24369	6.24371	0.1HOM	16	2.575920271	1.999325806	1	1	1 HOM
395	528	34798	12	5	269	0:00:15-0:00:16	16	0.1	WT		6.56623	6.56625	0.1WT	16	0.7041768	0.934000903	1	1	1 WT
396	529	34864	12	6	270	0:00:15-0:00:16	16	0.1	HET		5.09238	5.0924	0.1HET	16	0.165453143	0.057074345	1	1	1 HET
397	530	34930	12	7	271	0:00:15-0:00:16	16	0.05	HOM		1.77781	1.77782	0.05HOM	16	3.352947143	1.230207625	1	0	1 HOM
398	534	35194	12	11	275	0:00:15-0:00:16	16	0.05	WT		1.81496	1.81497	0.05WT	16	0.101265329	0.093683752	1	0	1 WT
399	536	35326	12	13	277	0:00:15-0:00:16	16	0	HOM		3.76785	3.76786	0.0-HOM	16	2.190753714	1.252251081	1	0	1 HOM
400	538	35458	12	15	279	0:00:15-0:00:16	16	0	HET		3.89641	3.89642	0.0-HET	16	2.899242857	1.146707061	1	0	1 HET
401	539	35524	12	16	280	0:00:15-0:00:16	16	0	HOM		0.867039	1.00043	0.0-HOM	16	0	0	1	0	1 HOM
402	540	35590	12	18	282	0:00:15-0:00:16	16	0	HET		4.63631	5.3496	0.0-HET	16	0	0	1	1	1 HET
403	541	35656	12	19	283	0:00:15-0:00:16	16	0.5	HOM		6.12783	6.12786	0.5HOM	16	0.772220429	0.986281066	1	1	1 HOM
404	543	35788	12	21	285	0:00:15-0:00:16	16	0.5	HET		0.0827383	0.0827386	0.5HET	16	0.968227486	1.379589195	1	0	1 HET
405	544	35854	12	22	286	0:00:15-0:00:16	16	0.5	HOM		7.78228	7.78231	0.5HOM	16	1.267766571	0.899674818	1	1	1 HOM
406	545	35920	12	23	287	0:00:15-0:00:16	16	0.5	WT		6.64476	6.6448	0.5WT	16	4.199212857	1.129832637	1	1	1 WT
407	546	35986	12	24	288	0:00:15-0:00:16	16	0.5	HET		2.21525	2.21525	0.5HET	16	0.240444286	0.194609688	1	0	1 HET
408	1	19	1	1	1	0:00:18-0:00:19	19	0	WT	12:49.0	6.69369	6.69372	0.0-WT	19	1.180561286	1.135888549	2	1	2 WT
409	2	85	1	2	2	0:00:18-0:00:19	19	0	HET	12:49.0	1.87226	1.87227	0.0-HET	19	2.011318286	0.970482169	2	0	2 HET
410	3	151	1	3	3	0:00:18-0:00:19	19	0	HOM	12:49.0	2.16385	2.16387	0.0-HOM	19	2.889595714	0.904587765	2	0	2 HOM
411	4	217	1	4	4	0:00:18-0:00:19	19	0	WT	12:49.0	6.76233	6.76236	0.0-WT	19	2.368274	1.168113455	2	1	2 WT
412	5	283	1	6	6	0:00:18-0:00:19	19	0	HOM	12:49.0	0.398914	0.398915	0.0-HOM	19	0.013573627	0.035871086	2	0	2 HOM
413	7	415	1	8	8	0:00:18-0:00:19	19	0.05	HET	12:49.0	3.1847	3.18471	0.05HET	19	0.647693429	0.44453187	2	0	2 HET
414	8	481	1	9	9	0:00:18-0:00:19	19	0.05	HOM	12:49.0	2.78759	2.7876	0.05HOM	19	5.395067143	1.408212512	2	0	2 HOM
415	9	547	1	10	10	0:00:18-0:00:19	19	0.05	WT	12:49.0	5.65674	5.65676	0.05WT	19	2.577101429	1.153030511	2	1	2 WT
416	10	613	1	11	11	0:00:18-0:00:19	19	0.05	HET	12:49.0	7.04048	7.04051	0.05HET	19	2.877030143	2.307565872	2	1	2 HET
417	11	679	1	12	12	0:00:18-0:00:19	19	0.05	HOM	12:49.0	7.88413	7.88417	0.05HOM	19	1.740242286	0.652992436	2	1	2 HOM
418	12	745	1	13	13	0:00:18-0:00:19	19	0.1	WT	12:49.0	7.81667	7.8167	0.1WT	19	2.032282429	1.084776067	2	1	2 WT
419	13	811	1	14	14	0:00:18-0:00:19	19	0.1	HET	12:49.0	5.80186	5.80189	0.1HET	19	2.210420857	0.995603805	2	1	2 HET
420	14	877	1	15	15	0:00:18-0:00:19	19	0.1	HOM	12:49.0	2.59756	2.59757	0.1HOM	19	1.667926914	1.106488132	2	0	2 HOM
421	15	943	1	16	16	0:00:18-0:00:19	19	0.1	WT	12:49.0	0.206865	0.206866	0.1WT	19	0.381698357	0.470994943	2	0	2 WT
422	16	1009	1	17	17	0:00:18-0:00:19	19	0.1	HET	12:49.0	0.532203	0.532206	0.1HET	19	1.353618571	0.737939176	2	0	2 HET
423	17	1075	1	18	18	0:00:18-0:00:19	19	0.1	HOM	12:49.0	4.00432	4.00433	0.1HOM	19	0.914573143	0.657132531	2	0	2 HOM
424	18	1141	1	19	19	0:00:18-0:00:19	19	0.5	WT	12:49.0	3.22782	3.22783	0.5WT	19	1.497794143	0.873332404	2	0	2 WT
425	19	1207	1	20	20	0:00:18-0:00:19	19	0.5	HET	12:49.0	0.122281	0.122282	0.5HET	19	0.208540143	0.04954608	2	0	2 HET
426	20	1273	1	21	21	0:00:18-0:00:19	19	0.5	HOM	12:49.0	8.47403	8.47407	0.5HOM	19	0.297336857	0.315797242	2	1	2 HOM
427	21	1339	1	22	22	0:00:18-0:00:19	19	0.5	WT	12:49.0	4.19488	4.1949	0.5WT	19	1.779207571	1.952981837	2	0	2 WT
428	22	1405	1	23	23	0:00:18-0:00:19	19	0.5	HET	12:49.0	3.86051	3.86053	0.5HET	19	2.606451429	1.22774317	2	0	2 HET
429	23	1471	1	24	24	0:00:18-0:00:19	19	0.5	HOM	12:49.0	0.654101	0.654103	0.5HOM	19	0.349793143	0.123948779	2	0	2 HOM
430	24	1537	2	1	25	0:00:18-0:00:19	19	0.5	HOM	12:51.0	2.39536	2.39537	0.5HOM	19	1.437309	1.019745158	2	0	2 HOM
431	25	1603	2	2	26	0:00:18-0:00:19	19	0.5	HET	12:51.0	7.09395	7.09399	0.5HET	19	1.794850429	1.162152569	2	1	2 HET
432	28	1801	2	5	29	0:00:18-0:00:19	19	0.5	HET	12:51.0	0.276869	0.276871	0.5HET	19	2.3201377	2.988938233	2	0	2 HET
433	30	1933	2	7	31	0:00:18-0:00:19	19	0.1	HOM	12:51.0	7.40637	7.40641	0.1HOM	19	1.173173714	0.403128626	2	1	2 HOM
434	31	1999	2	8	32	0:00:18-0:00:19	19	0.1	HET	12:51.0	5.02139	5.02142	0.1HET	19	3.233362857	1.347631451	2	1	2 HET
435	32	2065	2	9	33	0:00:18-0:00:19	19	0.1	WT	12:51.0	0.632011	0.632014	0.1WT	19	1.721631	1.617305806	2	0	2 WT
436	34	2197	2	11	35	0:00:18-0:00:19	19	0.1	HET	12:51.0	7.3833	7.38333	0.1HET	19	0.300534571	0.066941886	2	1	2 HET
437	35	2263	2	12	36	0:00:18-0:00:19	19	0.1	WT	12:51.0	6.02939	6.02941	0.1WT	19	1.923331571	1.26464084	2	1	2 WT
438	37	2395	2	14	38	0:00:18-0:00:19	19	0.05	HET	12:51.0	6.12626	6.12629	0.05HET	19	2.290424429	1.351957642	2	1	2 HET
439	39	2527	2	16	40	0:00:18-0:00:19	19	0.05	HOM	12:51.0	5.51638	5.5164	0.05HOM	19	3.029794286	1.322979054	2	1	2 HOM
440	40	2593	2	17	41	0:00:18-0:00:19	19	0.05	HET	12:51.0	8.61093	8.61096	0.05HET	19	2.539301429	0.756876461	2	1	2 HET
441	41	2659	2	18	42	0:00:18-0:00:19	19	0.05	WT	12:51.0	5.01045	5.01047	0.05WT	19	3.043902857	2.094220958	2	1	2 WT
442	42	2725	2	19	43	0:00:18-0:00:19	19	0	HOM	12:51.0	2.49797	2.49798	0.0-HOM	19	0.703719	1.693157901	2	0	2 HOM
443	45	2923	2	22	46	0:00:18-0:00:19	19	0	HOM	12:51.0	10.1895	10.1895	0.0-HOM	19	4.174741429	2.660700231	2	1	2 HOM
444	47	3055	2	24	48	0:00:18-0:00:19	19	0	WT	12:51.0	6.35494	6.35496	0.0-WT	19	1.371783857	0.542303383	2	1	2 WT
445	48	3121	3	2	50	0:00:18-0:00:19	19	0.05	HOM	12:53.0	6.19681	6.19684	0.05HOM	19	4.12366	1.869821986	2	1	2 HOM
446	49	3187	3	3	51	0:00:18-0:00:19	19	0.05	WT	12:53.0	2.26347	2.26347	0.05WT	19	1.020839714	0.57873795	2	0	2 WT
447	52	3385	3	6	54	0:00:18-0:00:19	19	0.05	WT	12:53.0	5.09348	5.09349	0.05WT	19	1.159357	0.385291578	2	1	2 WT
448	54	3517	3	8	56	0:00:18-0:00:19	19	0	HOM	12:53.0	3.88964	3.88965	0.0-HOM	19	3.553782857	1.049053809	2	0	2 HOM
449	55	3583	3	9	57	0:00:18-0:00:19	19	0	WT	12:53.0	5.48896	5.48898	0.0-WT	19	1.986372	1.224975965	2	1	2 WT
450	56	3649	3	10	58	0:00:18-0:00:19	19	0	HET	12:53.0	4.90366	4.90368	0.0-HET	19	0.720728714	1.027707677	2	1	2 HET
451	57	3715	3	11	59	0:00:18-0:00:19	19	0	HOM	12:53.0	5.09667	5.09669	0.0-HOM	19	1.423637	0.765596929	2	1	2 HOM
452	58	3781	3	12	60	0:00:18-0:00:19	19	0	WT	12:53.0	0.634756	0.634758	0.0-WT	19	0.740175714	1.055826303	2	0	2 WT
453	59	3847	3	13	61	0:00:18-0:00:19	19	0.5	HET	12:53.0	1.88023	1.88024	0.5HET	19	0.641043714	0.261813274	2	0	2 HET
454	60	3913	3	14	62	0:00:18-0:00:19	19	0.5	HOM	12:53.0	5.21352	5.21354	0.5HOM	19	2.810754286	1.239577453	2	1	2 HOM
455	61	3979	3	15	63	0:00:18-0:00:19	19	0.5	WT	12:53.0	8.97042	8.97046	0.5WT	19	2.64463	1.196078924	2	1	2 WT
456	62	4045	3	16	64	0:00:18-0:00:19	19	0.5	HET	12:53.0	2.29526	2.29527	0.5HET	19	0.471522143	0.308495034	2	0	2 HET
457	63	4111	3	17	65	0:00:18-0:00:19	19	0.5	HOM	12:53.0	7.24707	7.2471	0.5HOM	19	2.187195857	1.331574952	2	1	2 HOM
458	64	4177	3	18	66	0:00:18-0:00:19	19	0.5	WT	12:53.0	5.71376	5.71378	0.5WT	19	2.303509286	0.891623508	2	1	2 WT
459	65	4243	3	19	67	0:00:18-0:00:19	19	0.1	HET	12:53.0	6.5808	6.58083	0.1HET	19	1.151475286	0.751492317	2	1	2 HET
460	66	4309	3	20	68	0:00:18-0:00:19	19	0.1	HOM	12:53.0	7.33443	7.33446	0.1HOM	19	2.768492857	1.01899573	2	1	2 HOM
461	67	4375	3	21	69	0:00:18-0:00:19	19	0.1	WT	12:53.0	0.428885	0.428885	0.1WT	19	1.072808029	0.562184755	2	0	2 WT
462	68	4441	3	22	70	0:00:18-0:00:19	19	0.1	HET	12:53.0	6.42851	6.42853	0.1HET	19	0.227902286	0.060786418	2	1	2 HET
463	69	4507	3	23	71	0:00:18-0:00:19	19	0.1	HOM	12:53.0	7.33313	7.33316	0.1HOM	19	3.34447	0.908484292	2	1	2 HOM
464	71	4639	4	1	73	0:00:18-0:00:19	19	0.1	HOM	12:54.0	2.92546	2.92547	0.1HOM	19	1.239805286	0.81827793	2	0	2 HOM
465	72	4705	4	2	74	0:00:18-0:00:19	19	0.1	WT	12:54.0	8.76862	8.76866	0.1WT	19	2.987192857	0.904824624	2	1	2 WT
466	74	4837	4	4	76	0:00:18-0:00:19	19	0.1	HOM	12:54.0	4.08235	4.08236	0.1HOM	19	3.209058571	1.269733628	2	0	2 HOM
467	76	4969	4	6	78	0:00:18-0:00:19	19	0.1	HET	12:54.0	2.71456	2.71457	0.1HET	19	0	0	2	0	2 HET
468	77	5035	4	7	79	0:00:18-0:00:19	19	0.05	HOM	12:54.0	3.82531	3.82532	0.05HOM	19	2.538768	1.595403351	2	0	2 HOM
469	80	5233	4	10	82	0:00:18-0:00:19	19	0.05	HOM	12:54.0	6.30786	6.30788	0.05HOM	19	0.240877429	0.057594612	2	1	2 HOM
470	83	5431	4	13	85	0:00:18-0:00:19	19	0	HOM	12:54.0	2.65175	2.65176	0.0-HOM	19	2.564042	1.406434787	2	0	2 HOM
471	84	5497	4	14	86	0:00:18-0:00:19	19	0	WT	12:54.0	5.94823	5.94825	0.0-WT	19	1.277219143	0.967451176	2	1	2 WT
472	86	5629	4	16	88	0:00:18-0:00:19	19	0	HOM	12:54.0	1.55302	1.55302	0.0-HOM	19	1.896747857	0.870392183	2	0	2 HOM
473	87	5695	4	17	89	0:00:18-0:00:19	19	0	WT	12:54.0	2.54391	2.54391	0.0-WT	19	2.189688571	0.744186359	2	0	2 WT
474	88	5761	4	18	90	0:00:18-0:00:19	19	0	HET	12:54.0	8.68061	8.97997	0.0-HET	19	2.721048571	1.249914543	2	1	2 HET
475	89	5827	4	19	91	0:00:18-0:00:19	19	0.5	HOM	12:54.0	2.5654	2.56541	0.5HOM	19	4.468614286	1.607349606	2	0	2 HOM
476	90	5893	4	20	92	0:00:18-0:00:19	19	0.5	WT	12:54.0	2.78666	2.78667	0.5WT	19	1.322670429	0.693460368	2	0	2 WT
477	91	5959	4	21	93	0:00:18-0:00:19	19	0.5	HET	12:54.0	4.05189	4.05191	0.5HET	19	1.736251	0.736099733	2	0	2 HET
478	92	6025	4	22	94	0:00:18-0:00:19	19	0.5	HOM	12:54.0	6.06316	6.06318	0.5HOM	19	1.891154	1.162973448	2	1	2 HOM
479	93	6091	4	23	95	0:00:18-0:00:19	19	0.5	WT	12:54.0	5.23119	5.23121	0.5WT	19	1.593217571	1.635678836	2	1	2 WT
480	94	6157	5	1	97	0:00:18-0:00:19	19	0	WT	12:56.0	3.49328	3.49329	0.0-WT	19	1.716623857	0.652471014	2	0	2 WT
481	96	6289	5	3	99	0:00:18-0:00:19	19	0	HOM	12:56.0	5.48928	5.4893	0.0-HOM	19	3.645612857	1.155423266	2	1	2 HOM
482	97	6355	5	4	100	0:00:18-0:00:19	19	0	WT	12:56.0	4.8037	4.80372	0.0-WT	19	2.620526857	2.176612002	2	1	2 WT
483	98	6421	5	5	101	0:00:18-0:00:19	19	0	HET	12:56.0	5.76299	5.763	0.0-HET	19	2.833251429	1.011953987	2	1	2 HET
484	99	6487	5	6	102	0:00:18-0:00:19	19	0	HOM	12:56.0	2.44692	2.44693	0.0-HOM	19	1.614774571	0.634151218	2	0	2 HOM
485	100	6553	5	7	103	0:00:18-0:00:19	19	0.05	WT	12:56.0	2.56079	2.5608	0.05WT	19	1.468153	1.278960247	2	0	2 WT
486	101	6619	5	8	104	0:00:18-0:00:19	19	0.05	HET	12:56.0	8.1972	8.19724	0.05HET	19	2.773088571	0.84732286	2	1	2 HET
487	102	6685	5	9	105	0:00:18-0:00:19	19	0.05	HOM	12:56.0	4.77749	4.77751	0.05HOM	19	0.521379143	0.04503448	2	1	2 HOM
488	103	6751	5	10	106	0:00:18-0:00:19	19	0.05	WT	12:56.0	3.96323	3.96324	0.05WT	19	1.632159	1.227781197	2	0	2 WT
489	104	6817	5	11	107	0:00:18-0:00:19	19	0.05	HET	12:56.0	3.76652	3.76653	0.05HET	19	1.499028857	0.825314053	2	0	2 HET
490	105	6883	5	12	108	0:00:18-0:00:19	19	0.05	HOM	12:56.0	5.91717	5.91719	0.05HOM	19	2.040175429	1.276707416	2	1	2 HOM
491	106	6949	5	13	109	0:00:18-0:00:19	19	0.1	WT	12:56.0	3.44814	3.44816	0.1WT	19	0.516920286	0.803320354	2	0	2 WT
492	107	7015	5	14	110	0:00:18-0:00:19	19	0.1	HET	12:56.0	6.97236	6.97239	0.1HET	19	2.105871429	0.678338778	2	1	2 HET
493	109	7147	5	16	112	0:00:18-0:00:19	19	0.1	WT	12:56.0	2.63152	2.63153	0.1WT	19	1.610134143	0.640268018	2	0	2 WT
494	110	7213	5	17	113	0:00:18-0:00:19	19	0.1	HET	12:56.0	4.72478	4.7248	0.1HET	19	2.140899857	1.165151366	2	1	2 HET
495	111	7279	5	18	114	0:00:18-0:00:19	19	0.1	HOM	12:56.0	7.34507	7.3451	0.1HOM	19	0.853213329	1.085359375	2	1	2 HOM
496	112	7345	5	19	115	0:00:18-0:00:19	19	0.5	WT	12:56.0	0.181278	0.181279	0.5WT	19	1.074989857	0.83624439	2	0	2 WT
497	113	7411	5	20	116	0:00:18-0:00:19	19	0.5	HET	12:56.0	0.193159	0.19316	0.5HET	19	1.219901143	1.093669556	2	0	2 HET
498	114	7477	5	21	117	0:00:18-0:00:19	19	0.5	HOM	12:56.0	2.03123	2.03124	0.5HOM	19	2.332858857	1.804969231	2	0	2 HOM
499	115	7543	5	22	118	0:00:18-0:00:19	19	0.5	WT	12:56.0	1.05447	1.05448	0.5WT	19	1.255830857	0.712211479	2	0	2 WT
500	116	7609	5	23	119	0:00:18-0:00:19	19	0.5	HET	12:56.0	1.53862	1.53862	0.5HET	19	1.853874143	0.699755011	2	0	2 HET
501	117	7675	5	24	120	0:00:18-0:00:19	19	0.5	HOM	12:56.0	1.26725	1.26726	0.5HOM	19	2.094971714	1.095230673	2	0	2 HOM
502	119	7807	6	2	122	0:00:18-0:00:19	19	0.5	HET	12:57.0	10.129	10.129	0.5HET	19	2.626486429	1.298223294	2	1	2 HET
503	120	7873	6	3	123	0:00:18-0:00:19	19	0.5	WT	12:57.0	7.36889	7.36892	0.5WT	19	2.567537143	1.160752961	2	1	2 WT
504	121	7939	6	4	124	0:00:18-0:00:19	19	0.5	HOM	12:57.0	0.30821	0.308212	0.5HOM	19	0.112247029	0.051276989	2	0	2 HOM
505	122	8005	6	5	125	0:00:18-0:00:19	19	0.5	HET	12:57.0	7.16643	7.16645	0.5HET	19	0.785613857	0.698682185	2	1	2 HET
506	123	8071	6	6	126	0:00:18-0:00:19	19	0.5	WT	12:57.0	0.164135	0.164136	0.5WT	19	2.401295143	1.220302752	2	0	2 WT
507	125	8203	6	8	128	0:00:18-0:00:19	19	0.1	HET	12:57.0	6.46815	6.46818	0.1HET	19	1.948756857	1.208198692	2	1	2 HET
508	126	8269	6	9	129	0:00:18-0:00:19	19	0.1	WT	12:57.0	0.249276	0.249278	0.1WT	19	0.889315614	0.999745766	2	0	2 WT
509	128	8401	6	11	131	0:00:18-0:00:19	19	0.1	HET	12:57.0	4.39851	4.39853	0.1HET	19	1.860198429	1.773097568	2	0	2 HET
510	129	8467	6	12	132	0:00:18-0:00:19	19	0.1	WT	12:57.0	1.67726	1.67727	0.1WT	19	2.448341143	1.392994021	2	0	2 WT
511	130	8533	6	13	133	0:00:18-0:00:19	19	0.05	HOM	12:57.0	3.32366	3.32367	0.05HOM	19	2.905667429	2.234423083	2	0	2 HOM
512	131	8599	6	14	134	0:00:18-0:00:19	19	0.05	HET	12:57.0	5.58319	5.58321	0.05HET	19	1.656211857	0.83480597	2	1	2 HET
513	132	8665	6	15	135	0:00:18-0:00:19	19	0.05	WT	12:57.0	9.17963	9.17969	0.05WT	19	1.138593143	0.722972032	2	1	2 WT
514	134	8797	6	17	137	0:00:18-0:00:19	19	0.05	HET	12:57.0	4.14905	4.14907	0.05HET	19	1.554092	1.688855217	2	0	2 HET
515	135	8863	6	18	138	0:00:18-0:00:19	19	0.05	WT	12:57.0	5.8173	5.81732	0.05WT	19	0.647834571	0.475049033	2	1	2 WT
516	137	8995	6	20	140	0:00:18-0:00:19	19	0	HET	12:57.0	3.56559	3.5656	0.0-HET	19	1.231204429	0.633436139	2	0	2 HET
517	139	9127	6	22	142	0:00:18-0:00:19	19	0	HOM	12:57.0	0.31357	0.313571	0.0-HOM	19	0.207687757	0.114345154	2	0	2 HOM
518	140	9193	6	23	143	0:00:18-0:00:19	19	0	HET	12:57.0	4.32935	4.32937	0.0-HET	19	0.375648571	0.323850098	2	0	2 HET
519	141	9259	7	1	145	0:00:18-0:00:19	19	0.05	HET	12:58.0	0.762981	0.762985	0.05HET	19	2.978892857	1.929675987	2	0	2 HET
520	145	9523	7	5	149	0:00:18-0:00:19	19	0.05	HOM	12:58.0	2.04876	2.04877	0.05HOM	19	3.878628571	1.449574306	2	0	2 HOM
521	146	9589	7	6	150	0:00:18-0:00:19	19	0.05	WT	12:58.0	0.510545	0.510547	0.05WT	19	2.184584286	0.975753038	2	0	2 WT
522	149	9787	7	10	154	0:00:18-0:00:19	19	0	HET	12:58.0	7.93598	7.93602	0.0-HET	19	0.285575571	0.431816887	2	1	2 HET
523	150	9853	7	14	158	0:00:18-0:00:19	19	0.5	HOM	12:58.0	7.45743	7.45746	0.5HOM	19	2.723723571	1.210933561	2	1	2 HOM
524	151	9919	7	15	159	0:00:18-0:00:19	19	0.5	WT	12:58.0	6.4802	6.48024	0.5WT	19	1.880752	1.51448201	2	1	2 WT
525	152	9985	7	16	160	0:00:18-0:00:19	19	0.5	HET	12:58.0	7.46953	7.46956	0.5HET	19	2.221199	1.880551301	2	1	2 HET
526	153	10051	7	17	161	0:00:18-0:00:19	19	0.5	HOM	12:58.0	7.79171	7.79175	0.5HOM	19	4.51535	1.332800125	2	1	2 HOM
527	156	10249	7	20	164	0:00:18-0:00:19	19	0.1	HOM	12:58.0	4.66594	4.66596	0.1HOM	19	3.903469857	4.587065004	2	1	2 HOM
528	157	10315	7	21	165	0:00:18-0:00:19	19	0.1	WT	12:58.0	2.17528	2.17529	0.1WT	19	2.886608714	2.935351973	2	0	2 WT
529	158	10381	7	22	166	0:00:18-0:00:19	19	0.1	HET	12:58.0	7.36745	7.36747	0.1HET	19	1.800143286	2.223983673	2	1	2 HET
530	159	10447	7	23	167	0:00:18-0:00:19	19	0.1	HOM	12:58.0	1.39252	1.39253	0.1HOM	19	1.021409429	1.071840721	2	0	2 HOM
531	160	10513	8	1	169	0:00:18-0:00:19	19	0.1	HOM	12:59.0	4.72776	4.72778	0.1HOM	19	1.593846714	0.846523033	2	1	2 HOM
532	161	10579	8	2	170	0:00:18-0:00:19	19	0.1	WT	12:59.0	0.00317076	0.00317079	0.1WT	19	0.109340143	0.289286826	2	0	2 WT
533	162	10645	8	3	171	0:00:18-0:00:19	19	0.1	HET	12:59.0	3.97935	3.97936	0.1HET	19	0.650460286	0.761144844	2	0	2 HET
534	163	10711	8	4	172	0:00:18-0:00:19	19	0.1	HOM	12:59.0	9.85773	9.85777	0.1HOM	19	2.855192714	1.342471596	2	1	2 HOM
535	165	10843	8	6	174	0:00:18-0:00:19	19	0.1	HET	12:59.0	6.80732	6.80735	0.1HET	19	0.949679357	0.80002752	2	1	2 HET
536	166	10909	8	7	175	0:00:18-0:00:19	19	0.05	HOM	12:59.0	3.0133	3.01332	0.05HOM	19	0.897638971	0.799453368	2	0	2 HOM
537	167	10975	8	8	176	0:00:18-0:00:19	19	0.05	WT	12:59.0	3.66161	3.66163	0.05WT	19	2.116546286	1.467558586	2	0	2 WT
538	168	11041	8	9	177	0:00:18-0:00:19	19	0.05	HET	12:59.0	8.67618	8.67621	0.05HET	19	0.316620429	0.223434385	2	1	2 HET
539	169	11107	8	10	178	0:00:18-0:00:19	19	0.05	HOM	12:59.0	3.31865	3.31867	0.05HOM	19	1.503959286	1.005175263	2	0	2 HOM
540	170	11173	8	11	179	0:00:18-0:00:19	19	0.05	WT	12:59.0	8.46458	8.46462	0.05WT	19	2.57616	1.577066033	2	1	2 WT
541	171	11239	8	12	180	0:00:18-0:00:19	19	0.05	HET	12:59.0	4.00775	4.00777	0.05HET	19	1.980208571	0.743320723	2	0	2 HET
542	172	11305	8	13	181	0:00:18-0:00:19	19	0	HOM	12:59.0	4.29739	4.29741	0.0-HOM	19	3.778705714	1.633009605	2	0	2 HOM
543	173	11371	8	14	182	0:00:18-0:00:19	19	0	WT	12:59.0	10.226	10.226	0.0-WT	19	1.225098857	0.944735915	2	1	2 WT
544	174	11437	8	15	183	0:00:18-0:00:19	19	0	HET	12:59.0	6.36682	6.36685	0.0-HET	19	2.904332286	2.629738354	2	1	2 HET
545	175	11503	8	16	184	0:00:18-0:00:19	19	0	HOM	12:59.0	7.31392	7.31395	0.0-HOM	19	2.340171429	1.221215019	2	1	2 HOM
546	176	11569	8	17	185	0:00:18-0:00:19	19	0	WT	12:59.0	5.72104	5.72106	0.0-WT	19	1.336164	0.994194907	2	1	2 WT
547	177	11635	8	19	187	0:00:18-0:00:19	19	0.5	HOM	12:59.0	5.98612	5.98614	0.5HOM	19	0	0	2	1	2 HOM
548	178	11701	8	20	188	0:00:18-0:00:19	19	0.5	WT	12:59.0	5.05745	5.05747	0.5WT	19	2.919832857	0.713807585	2	1	2 WT
549	179	11767	8	21	189	0:00:18-0:00:19	19	0.5	HET	12:59.0	0.207204	0.207205	0.5HET	19	0.132793171	0.023910874	2	0	2 HET
550	181	11899	8	23	191	0:00:18-0:00:19	19	0.5	WT	12:59.0	1.37611	1.37611	0.5WT	19	2.243468714	2.029499897	2	0	2 WT
551	182	11965	8	24	192	0:00:18-0:00:19	19	0.5	HET	12:59.0	0.707947	0.70795	0.5HET	19	0.127662129	0.067692967	2	0	2 HET
552	186	12229	9	4	196	0:00:18-0:00:19	19	0	WT	13:00.0	5.67934	5.67936	0.0-WT	19	0.955870286	0.773719706	2	1	2 WT
553	187	12295	9	5	197	0:00:18-0:00:19	19	0	HET	13:00.0	4.96821	4.96822	0.0-HET	19	1.379209714	0.955976944	2	1	2 HET
554	188	12361	9	6	198	0:00:18-0:00:19	19	0	HOM	13:00.0	8.00968	8.00971	0.0-HOM	19	0.175336	0.256626328	2	1	2 HOM
555	189	12427	9	7	199	0:00:18-0:00:19	19	0.05	WT	13:00.0	5.61994	5.61996	0.05WT	19	2.667998571	1.064283782	2	1	2 WT
556	191	12559	9	10	202	0:00:18-0:00:19	19	0.05	WT	13:00.0	6.90833	6.90835	0.05WT	19	3.557647143	1.465747329	2	1	2 WT
557	192	12625	9	11	203	0:00:18-0:00:19	19	0.05	HET	13:00.0	8.56756	8.56759	0.05HET	19	0.203747286	0.063253295	2	1	2 HET
558	193	12691	9	12	204	0:00:18-0:00:19	19	0.05	HOM	13:00.0	4.30228	4.3023	0.05HOM	19	2.032254	1.269137455	2	0	2 HOM
559	194	12757	9	13	205	0:00:18-0:00:19	19	0.1	WT	13:00.0	3.03776	3.03777	0.1WT	19	1.968111	1.479421564	2	0	2 WT
560	195	12823	9	14	206	0:00:18-0:00:19	19	0.1	HET	13:00.0	9.18767	9.1877	0.1HET	19	1.529421857	0.500326591	2	1	2 HET
561	196	12889	9	15	207	0:00:18-0:00:19	19	0.1	HOM	13:00.0	10.7783	10.7784	0.1HOM	19	4.94337	1.195306503	2	1	2 HOM
562	197	12955	9	16	208	0:00:18-0:00:19	19	0.1	WT	13:00.0	5.39475	5.39477	0.1WT	19	1.411252143	0.769107686	2	1	2 WT
563	198	13021	9	17	209	0:00:18-0:00:19	19	0.1	HET	13:00.0	2.49633	2.49634	0.1HET	19	1.98885	0.747318271	2	0	2 HET
564	199	13087	9	18	210	0:00:18-0:00:19	19	0.1	HOM	13:00.0	5.33498	5.335	0.1HOM	19	1.219181014	0.832128407	2	1	2 HOM
565	202	13285	9	21	213	0:00:18-0:00:19	19	0.5	HOM	13:00.0	5.27943	5.27945	0.5HOM	19	0	0	2	1	2 HOM
566	204	13417	9	23	215	0:00:18-0:00:19	19	0.5	HET	13:00.0	4.73935	4.73936	0.5HET	19	2.115048	0.958390913	2	1	2 HET
567	205	13483	9	24	216	0:00:18-0:00:19	19	0.5	HOM	13:00.0	6.8661	6.86613	0.5HOM	19	3.720442857	1.330477756	2	1	2 HOM
568	208	13681	10	3	219	0:00:18-0:00:19	19	0.5	WT	13:01.0	1.30416	1.30417	0.5WT	19	0.209971286	0.037172714	2	0	2 WT
569	210	13813	10	5	221	0:00:18-0:00:19	19	0.5	HET	13:01.0	0.610442	0.610444	0.5HET	19	1.844090857	0.983350064	2	0	2 HET
570	211	13879	10	6	222	0:00:18-0:00:19	19	0.5	WT	13:01.0	5.30946	5.30949	0.5WT	19	0	0	2	1	2 WT
571	213	14011	10	8	224	0:00:18-0:00:19	19	0.1	HET	13:01.0	0.959125	0.959127	0.1HET	19	0.546414714	0.403014291	2	0	2 HET
572	214	14077	10	9	225	0:00:18-0:00:19	19	0.1	WT	13:01.0	3.36625	3.36626	0.1WT	19	2.584802857	1.428263162	2	0	2 WT
573	215	14143	10	10	226	0:00:18-0:00:19	19	0.1	HOM	13:01.0	8.71501	8.71505	0.1HOM	19	2.879014357	4.5680578	2	1	2 HOM
574	217	14275	10	12	228	0:00:18-0:00:19	19	0.1	WT	13:01.0	4.35379	4.35381	0.1WT	19	1.961622143	1.97381419	2	0	2 WT
575	219	14407	10	14	230	0:00:18-0:00:19	19	0.05	HET	13:01.0	7.23128	7.23132	0.05HET	19	2.604767143	0.948816529	2	1	2 HET
576	220	14473	10	15	231	0:00:18-0:00:19	19	0.05	WT	13:01.0	0.517262	0.517263	0.05WT	19	1.750391429	0.571549178	2	0	2 WT
577	221	14539	10	16	232	0:00:18-0:00:19	19	0.05	HOM	13:01.0	0.951817	0.951821	0.05HOM	19	0.325223686	0.318979473	2	0	2 HOM
578	222	14605	10	18	234	0:00:18-0:00:19	19	0.05	WT	13:01.0	2.36193	2.36194	0.05WT	19	2.8635	0.992887729	2	0	2 WT
579	223	14671	10	19	235	0:00:18-0:00:19	19	0	HOM	13:01.0	7.91038	7.91042	0.0-HOM	19	4.060644286	1.778421512	2	1	2 HOM
580	224	14737	10	20	236	0:00:18-0:00:19	19	0	HET	13:01.0	7.48618	7.48621	0.0-HET	19	0.911720857	0.63114733	2	1	2 HET
581	225	14803	10	21	237	0:00:18-0:00:19	19	0	WT	13:01.0	9.53853	9.53855	0.0-WT	19	2.444163143	2.074162919	2	1	2 WT
582	226	14869	10	22	238	0:00:18-0:00:19	19	0	HOM	13:01.0	7.5725	7.57253	0.0-HOM	19	1.955062857	0.990254499	2	1	2 HOM
583	227	14935	10	23	239	0:00:18-0:00:19	19	0	HET	13:01.0	2.42044	2.42045	0.0-HET	19	1.008678571	0.418522585	2	0	2 HET
584	228	15001	10	24	240	0:00:18-0:00:19	19	0	WT	13:01.0	5.21273	5.21276	0.0-WT	19	2.173942286	1.789427222	2	1	2 WT
585	229	15067	11	1	241	0:00:18-0:00:19	19	0.05	HET	13:03.0	4.18911	4.18913	0.05HET	19	2.911951286	2.38134668	2	0	2 HET
586	230	15133	11	2	242	0:00:18-0:00:19	19	0.05	HOM	13:03.0	6.16949	6.16952	0.05HOM	19	0.4094815	0.50135872	2	1	2 HOM
587	231	15199	11	3	243	0:00:18-0:00:19	19	0.05	WT	13:03.0	5.5565	5.55652	0.05WT	19	1.758758571	1.23806334	2	1	2 WT
588	232	15265	11	4	244	0:00:18-0:00:19	19	0.05	HET	13:03.0	4.55954	4.55956	0.05HET	19	2.925303143	1.145086292	2	0	2 HET
589	233	15331	11	5	245	0:00:18-0:00:19	19	0.05	HOM	13:03.0	6.22477	6.22479	0.05HOM	19	1.516169857	1.269282766	2	1	2 HOM
590	234	15397	11	6	246	0:00:18-0:00:19	19	0.05	WT	13:03.0	1.69708	1.69709	0.05WT	19	1.171690143	0.540371432	2	0	2 WT
591	235	15463	11	7	247	0:00:18-0:00:19	19	0	HET	13:03.0	3.65392	3.65393	0.0-HET	19	0.534916443	0.388884892	2	0	2 HET
592	236	15529	11	8	248	0:00:18-0:00:19	19	0	HOM	13:03.0	0.586133	0.586135	0.0-HOM	19	0.233586243	0.126148153	2	0	2 HOM
593	237	15595	11	9	249	0:00:18-0:00:19	19	0	WT	13:03.0	8.982	8.98205	0.0-WT	19	0	0	2	1	2 WT
594	238	15661	11	10	250	0:00:18-0:00:19	19	0	HET	13:03.0	2.55798	2.55799	0.0-HET	19	1.192299714	1.569545383	2	0	2 HET
595	239	15727	11	11	251	0:00:18-0:00:19	19	0	HOM	13:03.0	2.44673	2.44674	0.0-HOM	19	4.36581	3.033869983	2	0	2 HOM
596	240	15793	11	12	252	0:00:18-0:00:19	19	0	WT	13:03.0	1.40461	1.40462	0.0-WT	19	2.863136143	1.808829927	2	0	2 WT
597	241	15859	11	13	253	0:00:18-0:00:19	19	0.5	HET	13:03.0	0.742556	0.74256	0.5HET	19	0.603621714	0.113609504	2	0	2 HET
598	243	15991	11	15	255	0:00:18-0:00:19	19	0.5	WT	13:03.0	0.223757	0.223758	0.5WT	19	2.220864286	0.675086586	2	0	2 WT
599	244	16057	11	16	256	0:00:18-0:00:19	19	0.5	HET	13:03.0	10.3215	10.3215	0.5HET	19	2.40336	1.527346665	2	1	2 HET
600	245	16123	11	17	257	0:00:18-0:00:19	19	0.5	HOM	13:03.0	3.1406	3.14062	0.5HOM	19	3.940088571	2.473759295	2	0	2 HOM
601	246	16189	11	18	258	0:00:18-0:00:19	19	0.5	WT	13:03.0	4.49951	4.49953	0.5WT	19	2.534458857	1.562465359	2	0	2 WT
602	247	16255	11	19	259	0:00:18-0:00:19	19	0.1	HET	13:03.0	6.12849	6.12852	0.1HET	19	1.483819429	0.70327409	2	1	2 HET
603	248	16321	11	20	260	0:00:18-0:00:19	19	0.1	HOM	13:03.0	6.16369	6.16371	0.1HOM	19	0.0456878	0.097142031	2	1	2 HOM
604	249	16387	11	21	261	0:00:18-0:00:19	19	0.1	WT	13:03.0	0.202577	0.202578	0.1WT	19	0.058464801	0.094748498	2	0	2 WT
605	250	16453	11	22	262	0:00:18-0:00:19	19	0.1	HET	13:03.0	4.39103	4.39104	0.1HET	19	0.906252857	0.794057434	2	0	2 HET
606	251	16519	11	23	263	0:00:18-0:00:19	19	0.1	HOM	13:03.0	3.32701	3.32702	0.1HOM	19	1.382247857	0.297391816	2	0	2 HOM
607	252	16585	11	24	264	0:00:18-0:00:19	19	0.1	WT	13:03.0	1.69062	1.69063	0.1WT	19	1.829352286	1.141634119	2	0	2 WT
608	253	16651	12	1	265	0:00:18-0:00:19	19	0.1	HOM	13:03.0	3.94579	3.94581	0.1HOM	19	2.392802857	0.634858216	2	0	2 HOM
609	254	16717	12	2	266	0:00:18-0:00:19	19	0.1	WT	13:03.0	4.68491	4.68493	0.1WT	19	3.945447143	2.654153763	2	1	2 WT
610	255	16783	12	3	267	0:00:18-0:00:19	19	0.1	HET	13:03.0	4.72613	4.72615	0.1HET	19	1.208657714	0.720422302	2	1	2 HET
611	258	16981	12	6	270	0:00:18-0:00:19	19	0.1	HET	13:03.0	3.75142	3.75144	0.1HET	19	1.375691714	1.322622114	2	0	2 HET
612	260	17113	12	8	272	0:00:18-0:00:19	19	0.05	WT	13:03.0	9.12504	9.12508	0.05WT	19	2.837144286	0.901900947	2	1	2 WT
613	261	17179	12	9	273	0:00:18-0:00:19	19	0.05	HET	13:03.0	3.76351	3.76353	0.05HET	19	1.754498	1.683756845	2	0	2 HET
614	262	17245	12	11	275	0:00:18-0:00:19	19	0.05	WT	13:03.0	8.33019	8.33023	0.05WT	19	1.868566571	2.240733401	2	1	2 WT
615	264	17377	12	13	277	0:00:18-0:00:19	19	0	HOM	13:03.0	8.19889	8.19892	0.0-HOM	19	2.024857857	1.061040349	2	1	2 HOM
616	265	17443	12	14	278	0:00:18-0:00:19	19	0	WT	13:03.0	5.78303	5.78306	0.0-WT	19	3.012535143	2.027379406	2	1	2 WT
617	266	17509	12	15	279	0:00:18-0:00:19	19	0	HET	13:03.0	0.23314	0.233142	0.0-HET	19	0.243097857	0.064655057	2	0	2 HET
618	267	17575	12	16	280	0:00:18-0:00:19	19	0	HOM	13:03.0	3.42269	3.4227	0.0-HOM	19	0.309036571	0.056648521	2	0	2 HOM
619	268	17641	12	17	281	0:00:18-0:00:19	19	0	WT	13:03.0	2.93645	2.93646	0.0-WT	19	2.733588843	3.15679764	2	0	2 WT
620	271	17839	12	20	284	0:00:18-0:00:19	19	0.5	WT	13:03.0	3.30087	3.30087	0.5WT	19	2.579924286	0.920888844	2	0	2 WT
621	272	17905	12	21	285	0:00:18-0:00:19	19	0.5	HET	13:03.0	3.02873	3.02874	0.5HET	19	3.487605714	1.444416381	2	0	2 HET
622	274	18037	12	23	287	0:00:18-0:00:19	19	0.5	WT	13:03.0	3.26726	3.26727	0.5WT	19	1.560275857	0.86528225	2	0	2 WT
623	276	18169	1	1	1	0:00:18-0:00:19	19	0	WT	27:35.0	4.14257	4.14259	0.0-WT	19	0.801322781	0.673350202	2	0	2 WT
624	277	18235	1	2	2	0:00:18-0:00:19	19	0	HET	27:35.0	0.22605	0.226051	0.0-HET	19	0.163810429	0.064965735	2	0	2 HET
625	278	18301	1	3	3	0:00:18-0:00:19	19	0	HOM	27:35.0	4.30457	4.30459	0.0-HOM	19	2.488771143	1.164110607	2	0	2 HOM
626	279	18367	1	4	4	0:00:18-0:00:19	19	0	WT	27:35.0	0.160165	0.160165	0.0-WT	19	0.235994971	0.217527265	2	0	2 WT
627	280	18433	1	5	5	0:00:18-0:00:19	19	0	HET	27:35.0	0.844952	0.844954	0.0-HET	19	0.224115	0.036495489	2	0	2 HET
628	281	18499	1	6	6	0:00:18-0:00:19	19	0	HOM	27:35.0	3.42586	3.42587	0.0-HOM	19	0.505809371	0.26143492	2	0	2 HOM
629	282	18565	1	7	7	0:00:18-0:00:19	19	0.05	WT	27:35.0	4.70983	4.70985	0.05WT	19	1.892991	1.198148389	2	1	2 WT
630	283	18631	1	8	8	0:00:18-0:00:19	19	0.05	HET	27:35.0	8.17333	8.17336	0.05HET	19	2.039051429	1.755701919	2	1	2 HET
631	285	18763	1	10	10	0:00:18-0:00:19	19	0.05	WT	27:35.0	7.08822	7.08825	0.05WT	19	4.268077143	2.122971174	2	1	2 WT
632	286	18829	1	11	11	0:00:18-0:00:19	19	0.05	HET	27:35.0	2.35894	2.35894	0.05HET	19	0.301975243	0.146940013	2	0	2 HET
633	287	18895	1	12	12	0:00:18-0:00:19	19	0.05	HOM	27:35.0	3.81987	3.81988	0.05HOM	19	1.935541286	1.193304716	2	0	2 HOM
634	292	19225	1	17	17	0:00:18-0:00:19	19	0.1	HET	27:35.0	5.13008	5.13009	0.1HET	19	1.933311429	0.46450913	2	1	2 HET
635	293	19291	1	18	18	0:00:18-0:00:19	19	0.1	HOM	27:35.0	3.46747	3.46748	0.1HOM	19	1.292337286	0.717589688	2	0	2 HOM
636	295	19423	1	21	21	0:00:18-0:00:19	19	0.5	HOM	27:35.0	6.04136	6.04139	0.5HOM	19	3.443564286	1.917945882	2	1	2 HOM
637	296	19489	1	22	22	0:00:18-0:00:19	19	0.5	WT	27:35.0	0.621018	0.621021	0.5WT	19	0.274021571	0.106959045	2	0	2 WT
638	299	19687	2	1	25	0:00:18-0:00:19	19	0.5	HOM	32:40.0	10.5617	10.5618	0.5HOM	19	1.538928957	1.121068475	2	1	2 HOM
639	300	19753	2	2	26	0:00:18-0:00:19	19	0.5	HET	32:40.0	6.25522	6.25525	0.5HET	19	3.142895714	1.05853828	2	1	2 HET
640	301	19819	2	3	27	0:00:18-0:00:19	19	0.5	WT	32:40.0	4.2051	4.20512	0.5WT	19	1.933544286	0.539906297	2	0	2 WT
641	302	19885	2	4	28	0:00:18-0:00:19	19	0.5	HOM	32:40.0	1.10721	1.10722	0.5HOM	19	1.2246762	1.122929069	2	0	2 HOM
642	304	20017	2	6	30	0:00:18-0:00:19	19	0.5	WT	32:40.0	2.43911	2.43912	0.5WT	19	1.760221429	1.50419859	2	0	2 WT
643	305	20083	2	7	31	0:00:18-0:00:19	19	0.1	HOM	32:40.0	7.86428	7.86431	0.1HOM	19	1.123118143	0.992475164	2	1	2 HOM
644	306	20149	2	8	32	0:00:18-0:00:19	19	0.1	HET	32:40.0	6.22827	6.2283	0.1HET	19	2.388199714	1.808957235	2	1	2 HET
645	307	20215	2	9	33	0:00:18-0:00:19	19	0.1	WT	32:40.0	5.13516	5.13518	0.1WT	19	0.077457057	0.018130441	2	1	2 WT
646	308	20281	2	10	34	0:00:18-0:00:19	19	0.1	HOM	32:40.0	3.26557	3.26558	0.1HOM	19	2.768916429	1.993770189	2	0	2 HOM
647	310	20413	2	12	36	0:00:18-0:00:19	19	0.1	WT	32:40.0	1.61424	1.61425	0.1WT	19	0.060666271	0.029478073	2	0	2 WT
648	311	20479	2	13	37	0:00:18-0:00:19	19	0.05	HOM	32:40.0	1.74777	1.74778	0.05HOM	19	2.060246571	1.726436057	2	0	2 HOM
649	313	20611	2	17	41	0:00:18-0:00:19	19	0.05	HET	32:40.0	6.94639	6.94642	0.05HET	19	0.543101886	0.355257238	2	1	2 HET
650	314	20677	2	18	42	0:00:18-0:00:19	19	0.05	WT	32:40.0	6.19102	6.19105	0.05WT	19	1.550958286	1.098421085	2	1	2 WT
651	315	20743	2	19	43	0:00:18-0:00:19	19	0	HOM	32:40.0	0.250495	0.250496	0.0-HOM	19	1.119408286	0.788965624	2	0	2 HOM
652	316	20809	2	20	44	0:00:18-0:00:19	19	0	HET	32:40.0	1.97771	1.97772	0.0-HET	19	2.934715714	0.639889361	2	0	2 HET
653	317	20875	2	21	45	0:00:18-0:00:19	19	0	WT	32:40.0	7.48024	7.48027	0.0-WT	19	3.699627143	2.272381261	2	1	2 WT
654	318	20941	2	22	46	0:00:18-0:00:19	19	0	HOM	32:40.0	5.2232	5.22322	0.0-HOM	19	1.572600714	1.184943005	2	1	2 HOM
655	319	21007	2	23	47	0:00:18-0:00:19	19	0	HET	32:40.0	5.73529	5.73531	0.0-HET	19	2.357226286	1.315801173	2	1	2 HET
656	320	21073	2	24	48	0:00:18-0:00:19	19	0	WT	32:40.0	2.67619	2.6762	0.0-WT	19	0	0	2	0	2 WT
657	322	21205	3	2	50	0:00:18-0:00:19	19	0.05	HOM	34:27.0	4.81333	4.81335	0.05HOM	19	0.647376	0.584247193	2	1	2 HOM
658	323	21271	3	3	51	0:00:18-0:00:19	19	0.05	WT	34:27.0	0.331321	0.331322	0.05WT	19	0.341070286	0.133718853	2	0	2 WT
659	324	21337	3	4	52	0:00:18-0:00:19	19	0.05	HET	34:27.0	6.9389	6.93893	0.05HET	19	0.706166143	0.242854386	2	1	2 HET
660	325	21403	3	5	53	0:00:18-0:00:19	19	0.05	HOM	34:27.0	7.14282	7.14285	0.05HOM	19	2.345938143	1.274259289	2	1	2 HOM
661	327	21535	3	7	55	0:00:18-0:00:19	19	0	HET	34:27.0	5.8956	5.89562	0.0-HET	19	3.617431429	1.614591682	2	1	2 HET
662	328	21601	3	8	56	0:00:18-0:00:19	19	0	HOM	34:27.0	5.44582	5.44584	0.0-HOM	19	1.570321714	1.186172665	2	1	2 HOM
663	329	21667	3	9	57	0:00:18-0:00:19	19	0	WT	34:27.0	0.942333	0.942338	0.0-WT	19	1.078725386	0.90602774	2	0	2 WT
664	331	21799	3	11	59	0:00:18-0:00:19	19	0	HOM	34:27.0	1.90333	1.90334	0.0-HOM	19	1.684990714	0.68590983	2	0	2 HOM
665	332	21865	3	12	60	0:00:18-0:00:19	19	0	WT	34:27.0	0.291143	0.291144	0.0-WT	19	0.266722586	0.088479771	2	0	2 WT
666	333	21931	3	13	61	0:00:18-0:00:19	19	0.5	HET	34:27.0	0.759457	0.759461	0.5HET	19	0	0	2	0	2 HET
667	334	21997	3	14	62	0:00:18-0:00:19	19	0.5	HOM	34:27.0	5.76869	5.76871	0.5HOM	19	3.065151	2.623836642	2	1	2 HOM
668	335	22063	3	15	63	0:00:18-0:00:19	19	0.5	WT	34:27.0	1.71325	1.71325	0.5WT	19	1.369665714	2.05538301	2	0	2 WT
669	336	22129	3	16	64	0:00:18-0:00:19	19	0.5	HET	34:27.0	6.65971	6.65974	0.5HET	19	2.412841429	1.000146156	2	1	2 HET
670	337	22195	3	17	65	0:00:18-0:00:19	19	0.5	HOM	34:27.0	4.52947	4.52949	0.5HOM	19	1.022981286	0.8599461	2	0	2 HOM
671	339	22327	3	19	67	0:00:18-0:00:19	19	0.1	HET	34:27.0	0.361016	0.361017	0.1HET	19	0.257138	0.374345331	2	0	2 HET
672	340	22393	3	20	68	0:00:18-0:00:19	19	0.1	HOM	34:27.0	6.98376	6.98379	0.1HOM	19	4.552258571	2.337052578	2	1	2 HOM
673	341	22459	3	21	69	0:00:18-0:00:19	19	0.1	WT	34:27.0	6.42916	6.42919	0.1WT	19	0.408891043	0.400085247	2	1	2 WT
674	342	22525	3	22	70	0:00:18-0:00:19	19	0.1	HET	34:27.0	7.63745	7.63749	0.1HET	19	3.091085286	1.921785279	2	1	2 HET
675	343	22591	3	23	71	0:00:18-0:00:19	19	0.1	HOM	34:27.0	0.357845	0.357846	0.1HOM	19	0	0	2	0	2 HOM
676	344	22657	3	24	72	0:00:18-0:00:19	19	0.1	WT	34:27.0	8.38127	8.3813	0.1WT	19	1.942092857	0.980518744	2	1	2 WT
677	345	22723	4	1	73	0:00:18-0:00:19	19	0.1	HOM	34:29.0	6.17566	6.17569	0.1HOM	19	2.416478286	1.132929452	2	1	2 HOM
678	346	22789	4	3	75	0:00:18-0:00:19	19	0.1	HET	34:29.0	5.11047	5.11049	0.1HET	19	2.678828571	0.912992859	2	1	2 HET
679	347	22855	4	4	76	0:00:18-0:00:19	19	0.1	HOM	34:29.0	5.13255	5.13258	0.1HOM	19	1.409958429	0.69717685	2	1	2 HOM
680	348	22921	4	5	77	0:00:18-0:00:19	19	0.1	WT	34:29.0	4.87417	4.87419	0.1WT	19	0.185796757	0.061208163	2	1	2 WT
681	349	22987	4	6	78	0:00:18-0:00:19	19	0.1	HET	34:29.0	6.4093	6.40932	0.1HET	19	1.293036571	0.87054493	2	1	2 HET
682	350	23053	4	7	79	0:00:18-0:00:19	19	0.05	HOM	34:29.0	7.32495	7.32498	0.05HOM	19	0	0	2	1	2 HOM
683	351	23119	4	8	80	0:00:18-0:00:19	19	0.05	WT	34:29.0	1.43235	1.43236	0.05WT	19	0.251510857	0.081753992	2	0	2 WT
684	352	23185	4	9	81	0:00:18-0:00:19	19	0.05	HET	34:29.0	5.26393	5.26395	0.05HET	19	3.177642857	0.803406579	2	1	2 HET
685	353	23251	4	10	82	0:00:18-0:00:19	19	0.05	HOM	34:29.0	3.16227	3.16228	0.05HOM	19	1.755331714	0.810469759	2	0	2 HOM
686	357	23515	4	14	86	0:00:18-0:00:19	19	0	WT	34:29.0	6.22332	6.22335	0.0-WT	19	3.632434286	1.566236106	2	1	2 WT
687	359	23647	4	17	89	0:00:18-0:00:19	19	0	WT	34:29.0	7.44719	7.44722	0.0-WT	19	1.522209	0.981357487	2	1	2 WT
688	360	23713	4	18	90	0:00:18-0:00:19	19	0	HET	34:29.0	6.64889	6.64892	0.0-HET	19	1.577842571	0.951897102	2	1	2 HET
689	361	23779	4	19	91	0:00:18-0:00:19	19	0.5	HOM	34:29.0	1.55166	1.55167	0.5HOM	19	1.487772	1.748051726	2	0	2 HOM
690	363	23911	4	21	93	0:00:18-0:00:19	19	0.5	HET	34:29.0	3.05193	3.05194	0.5HET	19	1.641836286	1.098903873	2	0	2 HET
691	364	23977	4	22	94	0:00:18-0:00:19	19	0.5	HOM	34:29.0	0.181876	0.181877	0.5HOM	19	0.192014857	0.045201036	2	0	2 HOM
692	365	24043	4	23	95	0:00:18-0:00:19	19	0.5	WT	34:29.0	0.185351	0.185352	0.5WT	19	0.487945286	0.556373516	2	0	2 WT
693	366	24109	4	24	96	0:00:18-0:00:19	19	0.5	HET	34:29.0	0.91274	0.912743	0.5HET	19	0	0	2	0	2 HET
694	367	24175	5	2	98	0:00:18-0:00:19	19	0	HET	34:30.0	1.97539	1.9754	0.0-HET	19	0	0	2	0	2 HET
695	368	24241	5	3	99	0:00:18-0:00:19	19	0	HOM	34:30.0	10.3482	10.3483	0.0-HOM	19	1.844229143	0.865538789	2	1	2 HOM
696	370	24373	5	8	104	0:00:18-0:00:19	19	0.05	HET	34:30.0	4.77179	4.77181	0.05HET	19	0	0	2	1	2 HET
697	372	24505	5	11	107	0:00:18-0:00:19	19	0.05	HET	34:30.0	6.87591	6.87594	0.05HET	19	2.445215286	2.63914923	2	1	2 HET
698	373	24571	5	12	108	0:00:18-0:00:19	19	0.05	HOM	34:30.0	4.45873	4.45875	0.05HOM	19	0.575410143	0.939186679	2	0	2 HOM
699	375	24703	5	14	110	0:00:18-0:00:19	19	0.1	HET	34:30.0	9.83675	9.83679	0.1HET	19	2.717921429	1.717109229	2	1	2 HET
700	376	24769	5	15	111	0:00:18-0:00:19	19	0.1	HOM	34:30.0	4.06445	4.06446	0.1HOM	19	1.323639429	1.024246744	2	0	2 HOM
701	378	24901	5	17	113	0:00:18-0:00:19	19	0.1	HET	34:30.0	5.29461	5.29463	0.1HET	19	0.478415657	0.859803719	2	1	2 HET
702	379	24967	5	18	114	0:00:18-0:00:19	19	0.1	HOM	34:30.0	4.0937	4.09372	0.1HOM	19	3.544155714	1.370413137	2	0	2 HOM
703	382	25165	5	21	117	0:00:18-0:00:19	19	0.5	HOM	34:30.0	5.38905	5.38908	0.5HOM	19	6.449035714	2.875613417	2	1	2 HOM
704	388	25561	6	3	123	0:00:18-0:00:19	19	0.5	WT	34:31.1	2.73941	2.73942	0.5WT	19	1.254090143	1.09461903	2	0	2 WT
705	390	25693	6	5	125	0:00:18-0:00:19	19	0.5	HET	34:31.1	8.78135	8.78138	0.5HET	19	5.548232857	2.621915632	2	1	2 HET
706	391	25759	6	6	126	0:00:18-0:00:19	19	0.5	WT	34:31.1	6.96028	6.9603	0.5WT	19	0.284694286	0.083926684	2	1	2 WT
707	394	25957	6	10	130	0:00:18-0:00:19	19	0.1	HOM	34:31.1	7.58859	7.58862	0.1HOM	19	2.222066286	1.250461419	2	1	2 HOM
708	396	26089	6	12	132	0:00:18-0:00:19	19	0.1	WT	34:31.1	0.149126	0.149127	0.1WT	19	0.123595614	0.081917985	2	0	2 WT
709	398	26221	6	14	134	0:00:18-0:00:19	19	0.05	HET	34:31.1	0.35685	0.356852	0.05HET	19	1.062497143	1.699373055	2	0	2 HET
710	402	26485	6	18	138	0:00:18-0:00:19	19	0.05	WT	34:31.1	5.11861	5.11863	0.05WT	19	1.961766286	1.142941225	2	1	2 WT
711	404	26617	6	20	140	0:00:18-0:00:19	19	0	HET	34:31.1	3.36E-06	3.36E-06	0.0-HET	19	2.683890286	3.117624921	2	0	2 HET
712	405	26683	6	21	141	0:00:18-0:00:19	19	0	WT	34:31.1	4.37473	4.37475	0.0-WT	19	2.749578571	1.04109058	2	0	2 WT
713	406	26749	6	22	142	0:00:18-0:00:19	19	0	HOM	34:31.1	8.47915	8.47919	0.0-HOM	19	3.459727143	0.906673772	2	1	2 HOM
714	407	26815	6	23	143	0:00:18-0:00:19	19	0	HET	34:31.1	0.21876	0.218761	0.0-HET	19	0.184876429	0.079722989	2	0	2 HET
715	408	26881	7	1	145	0:00:18-0:00:19	19	0.05	HET	34:32.1	0.631255	0.631258	0.05HET	19	0.225916143	0.066528201	2	0	2 HET
716	409	26947	7	2	146	0:00:18-0:00:19	19	0.05	HOM	34:32.1	7.28859	7.28862	0.05HOM	19	4.149767143	1.545972407	2	1	2 HOM
717	410	27013	7	3	147	0:00:18-0:00:19	19	0.05	WT	34:32.1	3.70141	3.70142	0.05WT	19	2.430496157	1.809683959	2	0	2 WT
718	411	27079	7	4	148	0:00:18-0:00:19	19	0.05	HET	34:32.1	6.43353	6.43356	0.05HET	19	0.813561029	1.052858082	2	1	2 HET
719	412	27145	7	5	149	0:00:18-0:00:19	19	0.05	HOM	34:32.1	8.45016	8.4502	0.05HOM	19	2.453819286	1.704826601	2	1	2 HOM
720	415	27343	7	8	152	0:00:18-0:00:19	19	0	HOM	34:32.1	8.46745	8.46749	0.0-HOM	19	0	0	2	1	2 HOM
721	416	27409	7	9	153	0:00:18-0:00:19	19	0	WT	34:32.1	2.61848	2.61849	0.0-WT	19	3.54386	1.28892968	2	0	2 WT
722	417	27475	7	10	154	0:00:18-0:00:19	19	0	HET	34:32.1	10.0052	10.0052	0.0-HET	19	1.655349857	1.267898776	2	1	2 HET
723	419	27607	7	12	156	0:00:18-0:00:19	19	0	WT	34:32.1	6.69216	6.69218	0.0-WT	19	4.741980057	3.860151174	2	1	2 WT
724	420	27673	7	13	157	0:00:18-0:00:19	19	0.5	HET	34:32.1	6.8256	6.82563	0.5HET	19	3.37518	1.86058891	2	1	2 HET
725	421	27739	7	14	158	0:00:18-0:00:19	19	0.5	HOM	34:32.1	8.688	8.68803	0.5HOM	19	1.540955571	0.909651702	2	1	2 HOM
726	422	27805	7	15	159	0:00:18-0:00:19	19	0.5	WT	34:32.1	0.22301	0.22301	0.5WT	19	0	0	2	0	2 WT
727	427	28135	7	20	164	0:00:18-0:00:19	19	0.1	HOM	34:32.1	4.66448	4.6645	0.1HOM	19	3.098356286	2.045602584	2	1	2 HOM
728	428	28201	7	21	165	0:00:18-0:00:19	19	0.1	WT	34:32.1	8.01357	8.01361	0.1WT	19	2.629341571	1.186960434	2	1	2 WT
729	431	28399	8	1	169	0:00:18-0:00:19	19	0.1	HOM	34:33.1	7.28875	7.28878	0.1HOM	19	3.814302857	1.519407652	2	1	2 HOM
730	432	28465	8	2	170	0:00:18-0:00:19	19	0.1	WT	34:33.1	7.05332	7.05335	0.1WT	19	2.770008714	1.532825163	2	1	2 WT
731	433	28531	8	3	171	0:00:18-0:00:19	19	0.1	HET	34:33.1	2.48912	2.48913	0.1HET	19	1.997442571	1.292430549	2	0	2 HET
732	436	28729	8	6	174	0:00:18-0:00:19	19	0.1	HET	34:33.1	0.179975	0.179976	0.1HET	19	0.021256989	0.022598218	2	0	2 HET
733	437	28795	8	7	175	0:00:18-0:00:19	19	0.05	HOM	34:33.1	8.02861	8.02864	0.05HOM	19	1.422668286	0.881241427	2	1	2 HOM
734	439	28927	8	9	177	0:00:18-0:00:19	19	0.05	HET	34:33.1	9.12046	9.12049	0.05HET	19	2.265922857	0.876776458	2	1	2 HET
735	440	28993	8	10	178	0:00:18-0:00:19	19	0.05	HOM	34:33.1	6.69531	6.69533	0.05HOM	19	1.312080743	1.697046118	2	1	2 HOM
736	441	29059	8	11	179	0:00:18-0:00:19	19	0.05	WT	34:33.1	2.80364	2.80365	0.05WT	19	1.467365143	0.621054876	2	0	2 WT
737	442	29125	8	12	180	0:00:18-0:00:19	19	0.05	HET	34:33.1	6.37786	6.37789	0.05HET	19	1.558695571	0.824641664	2	1	2 HET
738	444	29257	8	14	182	0:00:18-0:00:19	19	0	WT	34:33.1	5.73345	5.73347	0.0-WT	19	2.417332	1.486829717	2	1	2 WT
739	445	29323	8	15	183	0:00:18-0:00:19	19	0	HET	34:33.1	2.75068	2.75069	0.0-HET	19	1.015548	0.636303845	2	0	2 HET
740	446	29389	8	16	184	0:00:18-0:00:19	19	0	HOM	34:33.1	5.52981	5.52983	0.0-HOM	19	0.432392	0.324637049	2	1	2 HOM
741	448	29521	8	18	186	0:00:18-0:00:19	19	0	HET	34:33.1	10.5918	10.5919	0.0-HET	19	3.167127571	1.983598426	2	1	2 HET
742	450	29653	8	20	188	0:00:18-0:00:19	19	0.5	WT	34:33.1	6.47283	6.47286	0.5WT	19	2.444854286	1.537210945	2	1	2 WT
743	451	29719	8	21	189	0:00:18-0:00:19	19	0.5	HET	34:33.1	0.0455302	0.0455303	0.5HET	19	0.129140057	0.032762746	2	0	2 HET
744	452	29785	8	22	190	0:00:18-0:00:19	19	0.5	HOM	34:33.1	5.52965	5.52968	0.5HOM	19	1.547141971	0.999582456	2	1	2 HOM
745	453	29851	8	24	192	0:00:18-0:00:19	19	0.5	HET	34:33.1	3.43476	3.43478	0.5HET	19	0.385851857	0.200748566	2	0	2 HET
746	454	29917	9	1	193	0:00:18-0:00:19	19	0	WT	34:34.9	5.22501	5.22503	0.0-WT	19	0.901733371	0.703988941	2	1	2 WT
747	455	29983	9	2	194	0:00:18-0:00:19	19	0	HET	34:34.9	5.96489	5.96491	0.0-HET	19	0.9946023	1.000491	2	1	2 HET
748	456	30049	9	3	195	0:00:18-0:00:19	19	0	HOM	34:34.9	2.42016	2.42017	0.0-HOM	19	0.6315102	0.697621427	2	0	2 HOM
749	457	30115	9	4	196	0:00:18-0:00:19	19	0	WT	34:34.9	1.17515	1.17516	0.0-WT	19	1.209239571	0.686007294	2	0	2 WT
750	459	30247	9	6	198	0:00:18-0:00:19	19	0	HOM	34:34.9	4.98791	4.98793	0.0-HOM	19	2.253341429	0.900267268	2	1	2 HOM
751	460	30313	9	7	199	0:00:18-0:00:19	19	0.05	WT	34:34.9	4.42743	4.42745	0.05WT	19	0.078666571	0.055942584	2	0	2 WT
752	462	30445	9	9	201	0:00:18-0:00:19	19	0.05	HOM	34:34.9	0.120905	0.120905	0.05HOM	19	0.593299	0.576721276	2	0	2 HOM
753	463	30511	9	10	202	0:00:18-0:00:19	19	0.05	WT	34:34.9	5.67301	5.67303	0.05WT	19	2.293651429	0.738786859	2	1	2 WT
754	464	30577	9	11	203	0:00:18-0:00:19	19	0.05	HET	34:34.9	5.25069	5.25071	0.05HET	19	2.159125714	1.058595804	2	1	2 HET
755	465	30643	9	12	204	0:00:18-0:00:19	19	0.05	HOM	34:34.9	2.14893	2.14895	0.05HOM	19	1.454590429	0.94206514	2	0	2 HOM
756	466	30709	9	13	205	0:00:18-0:00:19	19	0.1	WT	34:34.9	3.48574	3.48576	0.1WT	19	3.192831429	1.29712637	2	0	2 WT
757	467	30775	9	14	206	0:00:18-0:00:19	19	0.1	HET	34:34.9	6.18843	6.18846	0.1HET	19	0	0	2	1	2 HET
758	470	30973	9	17	209	0:00:18-0:00:19	19	0.1	HET	34:34.9	0.273424	0.273426	0.1HET	19	1.698455429	1.019392371	2	0	2 HET
759	472	31105	9	19	211	0:00:18-0:00:19	19	0.5	WT	34:34.9	4.29272	4.29273	0.5WT	19	0.168815186	0.211468692	2	0	2 WT
760	473	31171	9	20	212	0:00:18-0:00:19	19	0.5	HET	34:34.9	3.40878	3.40878	0.5HET	19	1.827406286	1.346898024	2	0	2 HET
761	474	31237	9	21	213	0:00:18-0:00:19	19	0.5	HOM	34:34.9	2.52866	2.52867	0.5HOM	19	2.0645427	2.61266204	2	0	2 HOM
762	475	31303	9	22	214	0:00:18-0:00:19	19	0.5	WT	34:34.9	1.87278	1.87278	0.5WT	19	5.686230286	3.112936483	2	0	2 WT
763	476	31369	9	23	215	0:00:18-0:00:19	19	0.5	HET	34:34.9	2.0414	2.04141	0.5HET	19	0.536598571	0.501509195	2	0	2 HET
764	480	31633	10	3	219	0:00:18-0:00:19	19	0.5	WT	34:35.1	4.59772	4.59773	0.5WT	19	0	0	2	0	2 WT
765	481	31699	10	4	220	0:00:18-0:00:19	19	0.5	HOM	34:35.1	8.86484	8.86487	0.5HOM	19	3.36153	1.835384988	2	1	2 HOM
766	483	31831	10	6	222	0:00:18-0:00:19	19	0.5	WT	34:35.1	0.238009	0.23801	0.5WT	19	0.1996227	0.10616141	2	0	2 WT
767	484	31897	10	7	223	0:00:18-0:00:19	19	0.1	HOM	34:35.1	4.31636	4.31638	0.1HOM	19	2.784418571	1.202539475	2	0	2 HOM
768	485	31963	10	8	224	0:00:18-0:00:19	19	0.1	HET	34:35.1	2.36323	2.36324	0.1HET	19	0.131135329	0.031674	2	0	2 HET
769	486	32029	10	10	226	0:00:18-0:00:19	19	0.1	HOM	34:35.1	2.17269	2.1727	0.1HOM	19	0	0	2	0	2 HOM
770	487	32095	10	11	227	0:00:18-0:00:19	19	0.1	HET	34:35.1	9.6315	9.63154	0.1HET	19	0	0	2	1	2 HET
771	488	32161	10	12	228	0:00:18-0:00:19	19	0.1	WT	34:35.1	6.66748	6.6675	0.1WT	19	2.160123714	1.322054693	2	1	2 WT
772	489	32227	10	13	229	0:00:18-0:00:19	19	0.05	HOM	34:35.1	6.77069	6.77071	0.05HOM	19	2.740012857	0.778581437	2	1	2 HOM
773	490	32293	10	14	230	0:00:18-0:00:19	19	0.05	HET	34:35.1	7.34793	7.34796	0.05HET	19	4.305907143	3.29718663	2	1	2 HET
774	491	32359	10	15	231	0:00:18-0:00:19	19	0.05	WT	34:35.1	3.47773	3.47774	0.05WT	19	2.277127429	1.18636332	2	0	2 WT
775	492	32425	10	16	232	0:00:18-0:00:19	19	0.05	HOM	34:35.1	4.28809	4.28811	0.05HOM	19	2.402745286	1.323389434	2	0	2 HOM
776	493	32491	10	17	233	0:00:18-0:00:19	19	0.05	HET	34:35.1	7.06455	7.06458	0.05HET	19	1.579411714	0.629006572	2	1	2 HET
777	495	32623	10	19	235	0:00:18-0:00:19	19	0	HOM	34:35.1	4.1714	4.17142	0.0-HOM	19	1.747005429	0.661277608	2	0	2 HOM
778	497	32755	10	21	237	0:00:18-0:00:19	19	0	WT	34:35.1	6.69187	6.6919	0.0-WT	19	0	0	2	1	2 WT
779	500	32953	10	24	240	0:00:18-0:00:19	19	0	WT	34:35.1	7.89701	7.89704	0.0-WT	19	2.017896	1.008769424	2	1	2 WT
780	501	33019	11	1	241	0:00:18-0:00:19	19	0.05	HET	34:36.1	9.35837	9.35841	0.05HET	19	2.491906143	1.034833251	2	1	2 HET
781	502	33085	11	3	243	0:00:18-0:00:19	19	0.05	WT	34:36.1	9.12508	9.12512	0.05WT	19	4.621651429	2.32422033	2	1	2 WT
782	503	33151	11	4	244	0:00:18-0:00:19	19	0.05	HET	34:36.1	0.553843	0.553845	0.05HET	19	1.982193286	1.045205284	2	0	2 HET
783	504	33217	11	5	245	0:00:18-0:00:19	19	0.05	HOM	34:36.1	1.01289	1.01289	0.05HOM	19	1.484302429	2.007354846	2	0	2 HOM
784	505	33283	11	6	246	0:00:18-0:00:19	19	0.05	WT	34:36.1	2.36657	2.36658	0.05WT	19	2.205965857	1.121184338	2	0	2 WT
785	506	33349	11	7	247	0:00:18-0:00:19	19	0	HET	34:36.1	5.97868	5.9787	0.0-HET	19	2.369891429	1.138230861	2	1	2 HET
786	507	33415	11	8	248	0:00:18-0:00:19	19	0	HOM	34:36.1	3.96579	3.9658	0.0-HOM	19	3.690508571	2.043959196	2	0	2 HOM
787	508	33481	11	9	249	0:00:18-0:00:19	19	0	WT	34:36.1	6.84577	6.84579	0.0-WT	19	1.711349857	1.059908005	2	1	2 WT
788	509	33547	11	10	250	0:00:18-0:00:19	19	0	HET	34:36.1	2.16578	2.16579	0.0-HET	19	4.148462857	1.438116923	2	0	2 HET
789	511	33679	11	12	252	0:00:18-0:00:19	19	0	WT	34:36.1	3.49847	3.49848	0.0-WT	19	1.837219714	1.308639091	2	0	2 WT
790	512	33745	11	13	253	0:00:18-0:00:19	19	0.5	HET	34:36.1	2.67496	2.67497	0.5HET	19	3.386813143	1.874428883	2	0	2 HET
791	513	33811	11	14	254	0:00:18-0:00:19	19	0.5	HOM	34:36.1	8.73123	8.73127	0.5HOM	19	0.644066	0.513031796	2	1	2 HOM
792	514	33877	11	15	255	0:00:18-0:00:19	19	0.5	WT	34:36.1	2.53533	2.53535	0.5WT	19	2.784156857	2.41940726	2	0	2 WT
793	515	33943	11	16	256	0:00:18-0:00:19	19	0.5	HET	34:36.1	2.0947	2.09471	0.5HET	19	1.239999	0.577484894	2	0	2 HET
794	516	34009	11	17	257	0:00:18-0:00:19	19	0.5	HOM	34:36.1	4.96874	4.96876	0.5HOM	19	1.450888286	1.230211559	2	1	2 HOM
795	517	34075	11	18	258	0:00:18-0:00:19	19	0.5	WT	34:36.1	5.44073	5.44075	0.5WT	19	2.93749	1.678779889	2	1	2 WT
796	518	34141	11	19	259	0:00:18-0:00:19	19	0.1	HET	34:36.1	6.48101	6.48103	0.1HET	19	1.216238714	1.325158606	2	1	2 HET
797	519	34207	11	20	260	0:00:18-0:00:19	19	0.1	HOM	34:36.1	3.0699	3.06991	0.1HOM	19	2.862536	1.660111318	2	0	2 HOM
798	520	34273	11	21	261	0:00:18-0:00:19	19	0.1	WT	34:36.1	2.5822	2.58221	0.1WT	19	1.903320714	1.223215164	2	0	2 WT
799	521	34339	11	22	262	0:00:18-0:00:19	19	0.1	HET	34:36.1	6.36312	6.36314	0.1HET	19	1.370316286	1.340278038	2	1	2 HET
800	522	34405	11	23	263	0:00:18-0:00:19	19	0.1	HOM	34:36.1	1.94337	1.94338	0.1HOM	19	3.991257143	1.440579495	2	0	2 HOM
801	523	34471	11	24	264	0:00:18-0:00:19	19	0.1	WT	34:36.1	4.6997	4.69972	0.1WT	19	3.247503286	1.959396564	2	1	2 WT
802	524	34537	12	1	265	0:00:18-0:00:19	19	0.1	HOM		5.55868	5.5587	0.1HOM	19	1.566954857	1.572503193	2	1	2 HOM
803	525	34603	12	2	266	0:00:18-0:00:19	19	0.1	WT		6.31556	6.31559	0.1WT	19	1.073512	0.517390917	2	1	2 WT
804	526	34669	12	3	267	0:00:18-0:00:19	19	0.1	HET		3.59892	3.59894	0.1HET	19	2.683635714	1.455323755	2	0	2 HET
805	527	34735	12	4	268	0:00:18-0:00:19	19	0.1	HOM		4.8806	4.88062	0.1HOM	19	2.575920271	1.999325806	2	1	2 HOM
806	528	34801	12	5	269	0:00:18-0:00:19	19	0.1	WT		3.68385	3.68387	0.1WT	19	0.7041768	0.934000903	2	0	2 WT
807	529	34867	12	6	270	0:00:18-0:00:19	19	0.1	HET		4.3831	4.38311	0.1HET	19	0.165453143	0.057074345	2	0	2 HET
808	530	34933	12	7	271	0:00:18-0:00:19	19	0.05	HOM		4.89476	4.89478	0.05HOM	19	3.352947143	1.230207625	2	1	2 HOM
809	534	35197	12	11	275	0:00:18-0:00:19	19	0.05	WT		2.57117	2.57118	0.05WT	19	0.101265329	0.093683752	2	0	2 WT
810	536	35329	12	13	277	0:00:18-0:00:19	19	0	HOM		3.06167	3.06168	0.0-HOM	19	2.190753714	1.252251081	2	0	2 HOM
811	538	35461	12	15	279	0:00:18-0:00:19	19	0	HET		0.116845	0.116846	0.0-HET	19	2.899242857	1.146707061	2	0	2 HET
812	539	35527	12	16	280	0:00:18-0:00:19	19	0	HOM		2.48639	2.4864	0.0-HOM	19	0	0	2	0	2 HOM
813	540	35593	12	18	282	0:00:18-0:00:19	19	0	HET		5.54947	12.3322	0.0-HET	19	0	0	2	1	2 HET
814	541	35659	12	19	283	0:00:18-0:00:19	19	0.5	HOM		1.8443	1.84431	0.5HOM	19	0.772220429	0.986281066	2	0	2 HOM
815	543	35791	12	21	285	0:00:18-0:00:19	19	0.5	HET		2.48513	2.48514	0.5HET	19	0.968227486	1.379589195	2	0	2 HET
816	544	35857	12	22	286	0:00:18-0:00:19	19	0.5	HOM		0.478489	0.478492	0.5HOM	19	1.267766571	0.899674818	2	0	2 HOM
817	545	35923	12	23	287	0:00:18-0:00:19	19	0.5	WT		5.09353	5.09355	0.5WT	19	4.199212857	1.129832637	2	1	2 WT
818	546	35989	12	24	288	0:00:18-0:00:19	19	0.5	HET		5.56847	5.56849	0.5HET	19	0.240444286	0.194609688	2	1	2 HET
819	1	22	1	1	1	0:00:21-0:00:22	22	0	WT	12:49.0	4.53221	4.53223	0.0-WT	22	1.180561286	1.135888549	3	0	3 WT
820	2	88	1	2	2	0:00:21-0:00:22	22	0	HET	12:49.0	4.82593	4.82596	0.0-HET	22	2.011318286	0.970482169	3	1	3 HET
821	3	154	1	3	3	0:00:21-0:00:22	22	0	HOM	12:49.0	1.67227	1.67228	0.0-HOM	22	2.889595714	0.904587765	3	0	3 HOM
822	4	220	1	4	4	0:00:21-0:00:22	22	0	WT	12:49.0	1.02102	1.02103	0.0-WT	22	2.368274	1.168113455	3	0	3 WT
823	5	286	1	6	6	0:00:21-0:00:22	22	0	HOM	12:49.0	5.39772	5.39774	0.0-HOM	22	0.013573627	0.035871086	3	1	3 HOM
824	7	418	1	8	8	0:00:21-0:00:22	22	0.05	HET	12:49.0	1.47519	1.4752	0.05HET	22	0.647693429	0.44453187	3	0	3 HET
825	8	484	1	9	9	0:00:21-0:00:22	22	0.05	HOM	12:49.0	5.15021	5.15023	0.05HOM	22	5.395067143	1.408212512	3	1	3 HOM
826	9	550	1	10	10	0:00:21-0:00:22	22	0.05	WT	12:49.0	2.13739	2.1374	0.05WT	22	2.577101429	1.153030511	3	0	3 WT
827	10	616	1	11	11	0:00:21-0:00:22	22	0.05	HET	12:49.0	4.51084	4.51087	0.05HET	22	2.877030143	2.307565872	3	0	3 HET
828	11	682	1	12	12	0:00:21-0:00:22	22	0.05	HOM	12:49.0	4.33439	4.33441	0.05HOM	22	1.740242286	0.652992436	3	0	3 HOM
829	12	748	1	13	13	0:00:21-0:00:22	22	0.1	WT	12:49.0	5.91807	5.9181	0.1WT	22	2.032282429	1.084776067	3	1	3 WT
830	13	814	1	14	14	0:00:21-0:00:22	22	0.1	HET	12:49.0	4.76917	4.76919	0.1HET	22	2.210420857	0.995603805	3	1	3 HET
831	14	880	1	15	15	0:00:21-0:00:22	22	0.1	HOM	12:49.0	5.93118	5.9312	0.1HOM	22	1.667926914	1.106488132	3	1	3 HOM
832	15	946	1	16	16	0:00:21-0:00:22	22	0.1	WT	12:49.0	0.283639	0.28364	0.1WT	22	0.381698357	0.470994943	3	0	3 WT
833	16	1012	1	17	17	0:00:21-0:00:22	22	0.1	HET	12:49.0	3.44546	3.44547	0.1HET	22	1.353618571	0.737939176	3	0	3 HET
834	17	1078	1	18	18	0:00:21-0:00:22	22	0.1	HOM	12:49.0	0.442801	0.442802	0.1HOM	22	0.914573143	0.657132531	3	0	3 HOM
835	18	1144	1	19	19	0:00:21-0:00:22	22	0.5	WT	12:49.0	2.3199	2.31992	0.5WT	22	1.497794143	0.873332404	3	0	3 WT
836	19	1210	1	20	20	0:00:21-0:00:22	22	0.5	HET	12:49.0	0.273283	0.273284	0.5HET	22	0.208540143	0.04954608	3	0	3 HET
837	20	1276	1	21	21	0:00:21-0:00:22	22	0.5	HOM	12:49.0	3.99897	3.99898	0.5HOM	22	0.297336857	0.315797242	3	0	3 HOM
838	21	1342	1	22	22	0:00:21-0:00:22	22	0.5	WT	12:49.0	1.27411	1.27411	0.5WT	22	1.779207571	1.952981837	3	0	3 WT
839	22	1408	1	23	23	0:00:21-0:00:22	22	0.5	HET	12:49.0	4.54905	4.54907	0.5HET	22	2.606451429	1.22774317	3	0	3 HET
840	23	1474	1	24	24	0:00:21-0:00:22	22	0.5	HOM	12:49.0	0.372019	0.37202	0.5HOM	22	0.349793143	0.123948779	3	0	3 HOM
841	24	1540	2	1	25	0:00:21-0:00:22	22	0.5	HOM	12:51.0	5.11083	5.11085	0.5HOM	22	1.437309	1.019745158	3	1	3 HOM
842	25	1606	2	2	26	0:00:21-0:00:22	22	0.5	HET	12:51.0	3.05436	3.05437	0.5HET	22	1.794850429	1.162152569	3	0	3 HET
843	28	1804	2	5	29	0:00:21-0:00:22	22	0.5	HET	12:51.0	0.221792	0.221791	0.5HET	22	2.3201377	2.988938233	3	0	3 HET
844	29	1870	2	6	30	0:00:21-0:00:22	22	0.5	WT	12:51.0	1.39979	1.3998	0.5WT	22	1.042406286	1.605198035	3	0	3 WT
845	30	1936	2	7	31	0:00:21-0:00:22	22	0.1	HOM	12:51.0	5.22314	5.22316	0.1HOM	22	1.173173714	0.403128626	3	1	3 HOM
846	31	2002	2	8	32	0:00:21-0:00:22	22	0.1	HET	12:51.0	4.21825	4.21826	0.1HET	22	3.233362857	1.347631451	3	0	3 HET
847	32	2068	2	9	33	0:00:21-0:00:22	22	0.1	WT	12:51.0	3.7169	3.71691	0.1WT	22	1.721631	1.617305806	3	0	3 WT
848	33	2134	2	10	34	0:00:21-0:00:22	22	0.1	HOM	12:51.0	5.21493	5.21496	0.1HOM	22	2.229919857	1.023574587	3	1	3 HOM
849	34	2200	2	11	35	0:00:21-0:00:22	22	0.1	HET	12:51.0	4.02807	4.02809	0.1HET	22	0.300534571	0.066941886	3	0	3 HET
850	35	2266	2	12	36	0:00:21-0:00:22	22	0.1	WT	12:51.0	6.62025	6.62028	0.1WT	22	1.923331571	1.26464084	3	1	3 WT
851	37	2398	2	14	38	0:00:21-0:00:22	22	0.05	HET	12:51.0	7.20549	7.20552	0.05HET	22	2.290424429	1.351957642	3	1	3 HET
852	39	2530	2	16	40	0:00:21-0:00:22	22	0.05	HOM	12:51.0	6.04327	6.0433	0.05HOM	22	3.029794286	1.322979054	3	1	3 HOM
853	40	2596	2	17	41	0:00:21-0:00:22	22	0.05	HET	12:51.0	6.70604	6.70606	0.05HET	22	2.539301429	0.756876461	3	1	3 HET
854	41	2662	2	18	42	0:00:21-0:00:22	22	0.05	WT	12:51.0	9.9117	9.91174	0.05WT	22	3.043902857	2.094220958	3	1	3 WT
855	42	2728	2	19	43	0:00:21-0:00:22	22	0	HOM	12:51.0	6.43353	6.43356	0.0-HOM	22	0.703719	1.693157901	3	1	3 HOM
856	44	2860	2	21	45	0:00:21-0:00:22	22	0	WT	12:51.0	10.2735	10.2735	0.0-WT	22	0.2453313	0.130157665	3	1	3 WT
857	45	2926	2	22	46	0:00:21-0:00:22	22	0	HOM	12:51.0	10.7966	10.7966	0.0-HOM	22	4.174741429	2.660700231	3	1	3 HOM
858	46	2992	2	23	47	0:00:21-0:00:22	22	0	HET	12:51.0	4.32135	4.32136	0.0-HET	22	0.044198253	0.05314635	3	0	3 HET
859	47	3058	2	24	48	0:00:21-0:00:22	22	0	WT	12:51.0	4.42536	4.42538	0.0-WT	22	1.371783857	0.542303383	3	0	3 WT
860	48	3124	3	2	50	0:00:21-0:00:22	22	0.05	HOM	12:53.0	5.61939	5.61941	0.05HOM	22	4.12366	1.869821986	3	1	3 HOM
861	49	3190	3	3	51	0:00:21-0:00:22	22	0.05	WT	12:53.0	3.431	3.43102	0.05WT	22	1.020839714	0.57873795	3	0	3 WT
862	52	3388	3	6	54	0:00:21-0:00:22	22	0.05	WT	12:53.0	8.04219	8.04223	0.05WT	22	1.159357	0.385291578	3	1	3 WT
863	54	3520	3	8	56	0:00:21-0:00:22	22	0	HOM	12:53.0	5.34145	5.34147	0.0-HOM	22	3.553782857	1.049053809	3	1	3 HOM
864	55	3586	3	9	57	0:00:21-0:00:22	22	0	WT	12:53.0	1.83205	1.83206	0.0-WT	22	1.986372	1.224975965	3	0	3 WT
865	56	3652	3	10	58	0:00:21-0:00:22	22	0	HET	12:53.0	5.59526	5.59528	0.0-HET	22	0.720728714	1.027707677	3	1	3 HET
866	57	3718	3	11	59	0:00:21-0:00:22	22	0	HOM	12:53.0	6.59632	6.59635	0.0-HOM	22	1.423637	0.765596929	3	1	3 HOM
867	58	3784	3	12	60	0:00:21-0:00:22	22	0	WT	12:53.0	0.272516	0.272517	0.0-WT	22	0.740175714	1.055826303	3	0	3 WT
868	59	3850	3	13	61	0:00:21-0:00:22	22	0.5	HET	12:53.0	3.61553	3.61554	0.5HET	22	0.641043714	0.261813274	3	0	3 HET
869	60	3916	3	14	62	0:00:21-0:00:22	22	0.5	HOM	12:53.0	5.79944	5.79946	0.5HOM	22	2.810754286	1.239577453	3	1	3 HOM
870	62	4048	3	16	64	0:00:21-0:00:22	22	0.5	HET	12:53.0	4.32435	4.32436	0.5HET	22	0.471522143	0.308495034	3	0	3 HET
871	63	4114	3	17	65	0:00:21-0:00:22	22	0.5	HOM	12:53.0	7.28669	7.28672	0.5HOM	22	2.187195857	1.331574952	3	1	3 HOM
872	64	4180	3	18	66	0:00:21-0:00:22	22	0.5	WT	12:53.0	4.2491	4.24912	0.5WT	22	2.303509286	0.891623508	3	0	3 WT
873	65	4246	3	19	67	0:00:21-0:00:22	22	0.1	HET	12:53.0	6.52863	6.52866	0.1HET	22	1.151475286	0.751492317	3	1	3 HET
874	66	4312	3	20	68	0:00:21-0:00:22	22	0.1	HOM	12:53.0	4.43297	4.43299	0.1HOM	22	2.768492857	1.01899573	3	0	3 HOM
875	67	4378	3	21	69	0:00:21-0:00:22	22	0.1	WT	12:53.0	2.68768	2.68769	0.1WT	22	1.072808029	0.562184755	3	0	3 WT
876	68	4444	3	22	70	0:00:21-0:00:22	22	0.1	HET	12:53.0	6.02968	6.02971	0.1HET	22	0.227902286	0.060786418	3	1	3 HET
877	69	4510	3	23	71	0:00:21-0:00:22	22	0.1	HOM	12:53.0	9.8362	9.83624	0.1HOM	22	3.34447	0.908484292	3	1	3 HOM
878	70	4576	3	24	72	0:00:21-0:00:22	22	0.1	WT	12:53.0	0.672783	0.672787	0.1WT	22	7.063839571	7.201228625	3	0	3 WT
879	71	4642	4	1	73	0:00:21-0:00:22	22	0.1	HOM	12:54.0	0.347456	0.347459	0.1HOM	22	1.239805286	0.81827793	3	0	3 HOM
880	74	4840	4	4	76	0:00:21-0:00:22	22	0.1	HOM	12:54.0	4.36993	4.36995	0.1HOM	22	3.209058571	1.269733628	3	0	3 HOM
881	76	4972	4	6	78	0:00:21-0:00:22	22	0.1	HET	12:54.0	5.29257	5.29259	0.1HET	22	0	0	3	1	3 HET
882	77	5038	4	7	79	0:00:21-0:00:22	22	0.05	HOM	12:54.0	3.67236	3.67237	0.05HOM	22	2.538768	1.595403351	3	0	3 HOM
883	79	5170	4	9	81	0:00:21-0:00:22	22	0.05	HET	12:54.0	5.45356	5.45358	0.05HET	22	3.135845286	2.892266421	3	1	3 HET
884	80	5236	4	10	82	0:00:21-0:00:22	22	0.05	HOM	12:54.0	8.15244	8.15248	0.05HOM	22	0.240877429	0.057594612	3	1	3 HOM
885	83	5434	4	13	85	0:00:21-0:00:22	22	0	HOM	12:54.0	3.12962	3.12963	0.0-HOM	22	2.564042	1.406434787	3	0	3 HOM
886	84	5500	4	14	86	0:00:21-0:00:22	22	0	WT	12:54.0	5.93597	5.93599	0.0-WT	22	1.277219143	0.967451176	3	1	3 WT
887	86	5632	4	16	88	0:00:21-0:00:22	22	0	HOM	12:54.0	4.74661	4.74663	0.0-HOM	22	1.896747857	0.870392183	3	1	3 HOM
888	87	5698	4	17	89	0:00:21-0:00:22	22	0	WT	12:54.0	3.70445	3.70447	0.0-WT	22	2.189688571	0.744186359	3	0	3 WT
889	88	5764	4	18	90	0:00:21-0:00:22	22	0	HET	12:54.0	7.80018	7.80022	0.0-HET	22	2.721048571	1.249914543	3	1	3 HET
890	89	5830	4	19	91	0:00:21-0:00:22	22	0.5	HOM	12:54.0	0.833182	0.833185	0.5HOM	22	4.468614286	1.607349606	3	0	3 HOM
891	90	5896	4	20	92	0:00:21-0:00:22	22	0.5	WT	12:54.0	2.00176	2.00176	0.5WT	22	1.322670429	0.693460368	3	0	3 WT
892	91	5962	4	21	93	0:00:21-0:00:22	22	0.5	HET	12:54.0	3.84296	3.84297	0.5HET	22	1.736251	0.736099733	3	0	3 HET
893	92	6028	4	22	94	0:00:21-0:00:22	22	0.5	HOM	12:54.0	3.74597	3.74598	0.5HOM	22	1.891154	1.162973448	3	0	3 HOM
894	93	6094	4	23	95	0:00:21-0:00:22	22	0.5	WT	12:54.0	0.843968	0.843973	0.5WT	22	1.593217571	1.635678836	3	0	3 WT
895	94	6160	5	1	97	0:00:21-0:00:22	22	0	WT	12:56.0	3.34712	3.34713	0.0-WT	22	1.716623857	0.652471014	3	0	3 WT
896	96	6292	5	3	99	0:00:21-0:00:22	22	0	HOM	12:56.0	5.02765	5.02766	0.0-HOM	22	3.645612857	1.155423266	3	1	3 HOM
897	97	6358	5	4	100	0:00:21-0:00:22	22	0	WT	12:56.0	3.61791	3.61793	0.0-WT	22	2.620526857	2.176612002	3	0	3 WT
898	98	6424	5	5	101	0:00:21-0:00:22	22	0	HET	12:56.0	6.64274	6.64276	0.0-HET	22	2.833251429	1.011953987	3	1	3 HET
899	99	6490	5	6	102	0:00:21-0:00:22	22	0	HOM	12:56.0	1.57038	1.57039	0.0-HOM	22	1.614774571	0.634151218	3	0	3 HOM
900	100	6556	5	7	103	0:00:21-0:00:22	22	0.05	WT	12:56.0	4.65794	4.65796	0.05WT	22	1.468153	1.278960247	3	1	3 WT
901	101	6622	5	8	104	0:00:21-0:00:22	22	0.05	HET	12:56.0	0.21914	0.219141	0.05HET	22	2.773088571	0.84732286	3	0	3 HET
902	102	6688	5	9	105	0:00:21-0:00:22	22	0.05	HOM	12:56.0	5.10788	5.1079	0.05HOM	22	0.521379143	0.04503448	3	1	3 HOM
903	103	6754	5	10	106	0:00:21-0:00:22	22	0.05	WT	12:56.0	6.57625	6.57628	0.05WT	22	1.632159	1.227781197	3	1	3 WT
904	104	6820	5	11	107	0:00:21-0:00:22	22	0.05	HET	12:56.0	4.38427	4.38429	0.05HET	22	1.499028857	0.825314053	3	0	3 HET
905	105	6886	5	12	108	0:00:21-0:00:22	22	0.05	HOM	12:56.0	2.50664	2.50665	0.05HOM	22	2.040175429	1.276707416	3	0	3 HOM
906	106	6952	5	13	109	0:00:21-0:00:22	22	0.1	WT	12:56.0	1.10148	1.10149	0.1WT	22	0.516920286	0.803320354	3	0	3 WT
907	107	7018	5	14	110	0:00:21-0:00:22	22	0.1	HET	12:56.0	5.40097	5.401	0.1HET	22	2.105871429	0.678338778	3	1	3 HET
908	109	7150	5	16	112	0:00:21-0:00:22	22	0.1	WT	12:56.0	1.10956	1.10957	0.1WT	22	1.610134143	0.640268018	3	0	3 WT
909	110	7216	5	17	113	0:00:21-0:00:22	22	0.1	HET	12:56.0	5.55951	5.55953	0.1HET	22	2.140899857	1.165151366	3	1	3 HET
910	111	7282	5	18	114	0:00:21-0:00:22	22	0.1	HOM	12:56.0	0.448608	0.44861	0.1HOM	22	0.853213329	1.085359375	3	0	3 HOM
911	112	7348	5	19	115	0:00:21-0:00:22	22	0.5	WT	12:56.0	0.303997	0.304	0.5WT	22	1.074989857	0.83624439	3	0	3 WT
912	113	7414	5	20	116	0:00:21-0:00:22	22	0.5	HET	12:56.0	2.81497	2.81498	0.5HET	22	1.219901143	1.093669556	3	0	3 HET
913	114	7480	5	21	117	0:00:21-0:00:22	22	0.5	HOM	12:56.0	4.76363	4.76365	0.5HOM	22	2.332858857	1.804969231	3	1	3 HOM
914	115	7546	5	22	118	0:00:21-0:00:22	22	0.5	WT	12:56.0	0.595545	0.595546	0.5WT	22	1.255830857	0.712211479	3	0	3 WT
915	116	7612	5	23	119	0:00:21-0:00:22	22	0.5	HET	12:56.0	0.472395	0.472397	0.5HET	22	1.853874143	0.699755011	3	0	3 HET
916	117	7678	5	24	120	0:00:21-0:00:22	22	0.5	HOM	12:56.0	1.74623	1.74624	0.5HOM	22	2.094971714	1.095230673	3	0	3 HOM
917	119	7810	6	2	122	0:00:21-0:00:22	22	0.5	HET	12:57.0	6.23234	6.23237	0.5HET	22	2.626486429	1.298223294	3	1	3 HET
918	120	7876	6	3	123	0:00:21-0:00:22	22	0.5	WT	12:57.0	6.2556	6.25562	0.5WT	22	2.567537143	1.160752961	3	1	3 WT
919	121	7942	6	4	124	0:00:21-0:00:22	22	0.5	HOM	12:57.0	0.221927	0.221928	0.5HOM	22	0.112247029	0.051276989	3	0	3 HOM
920	122	8008	6	5	125	0:00:21-0:00:22	22	0.5	HET	12:57.0	4.28941	4.28943	0.5HET	22	0.785613857	0.698682185	3	0	3 HET
921	123	8074	6	6	126	0:00:21-0:00:22	22	0.5	WT	12:57.0	0.092818	0.0928182	0.5WT	22	2.401295143	1.220302752	3	0	3 WT
922	125	8206	6	8	128	0:00:21-0:00:22	22	0.1	HET	12:57.0	3.11034	3.11035	0.1HET	22	1.948756857	1.208198692	3	0	3 HET
923	126	8272	6	9	129	0:00:21-0:00:22	22	0.1	WT	12:57.0	4.65947	4.65949	0.1WT	22	0.889315614	0.999745766	3	1	3 WT
924	127	8338	6	10	130	0:00:21-0:00:22	22	0.1	HOM	12:57.0	6.91551	6.91553	0.1HOM	22	0	0	3	1	3 HOM
925	128	8404	6	11	131	0:00:21-0:00:22	22	0.1	HET	12:57.0	4.51991	4.51993	0.1HET	22	1.860198429	1.773097568	3	0	3 HET
926	129	8470	6	12	132	0:00:21-0:00:22	22	0.1	WT	12:57.0	2.60379	2.6038	0.1WT	22	2.448341143	1.392994021	3	0	3 WT
927	130	8536	6	13	133	0:00:21-0:00:22	22	0.05	HOM	12:57.0	2.6353	2.63532	0.05HOM	22	2.905667429	2.234423083	3	0	3 HOM
928	131	8602	6	14	134	0:00:21-0:00:22	22	0.05	HET	12:57.0	7.0276	7.02762	0.05HET	22	1.656211857	0.83480597	3	1	3 HET
929	132	8668	6	15	135	0:00:21-0:00:22	22	0.05	WT	12:57.0	0.330062	0.330063	0.05WT	22	1.138593143	0.722972032	3	0	3 WT
930	133	8734	6	16	136	0:00:21-0:00:22	22	0.05	HOM	12:57.0	7.67174	7.67178	0.05HOM	22	3.539044286	1.725730185	3	1	3 HOM
931	134	8800	6	17	137	0:00:21-0:00:22	22	0.05	HET	12:57.0	7.85077	7.8508	0.05HET	22	1.554092	1.688855217	3	1	3 HET
932	135	8866	6	18	138	0:00:21-0:00:22	22	0.05	WT	12:57.0	6.18356	6.18359	0.05WT	22	0.647834571	0.475049033	3	1	3 WT
933	137	8998	6	20	140	0:00:21-0:00:22	22	0	HET	12:57.0	4.94946	4.94948	0.0-HET	22	1.231204429	0.633436139	3	1	3 HET
934	139	9130	6	22	142	0:00:21-0:00:22	22	0	HOM	12:57.0	0.221405	0.221406	0.0-HOM	22	0.207687757	0.114345154	3	0	3 HOM
935	140	9196	6	23	143	0:00:21-0:00:22	22	0	HET	12:57.0	0.143373	0.143374	0.0-HET	22	0.375648571	0.323850098	3	0	3 HET
936	141	9262	7	1	145	0:00:21-0:00:22	22	0.05	HET	12:58.0	6.87905	6.87908	0.05HET	22	2.978892857	1.929675987	3	1	3 HET
937	144	9460	7	4	148	0:00:21-0:00:22	22	0.05	HET	12:58.0	4.30997	4.30998	0.05HET	22	0	0	3	0	3 HET
938	145	9526	7	5	149	0:00:21-0:00:22	22	0.05	HOM	12:58.0	3.41847	3.41848	0.05HOM	22	3.878628571	1.449574306	3	0	3 HOM
939	146	9592	7	6	150	0:00:21-0:00:22	22	0.05	WT	12:58.0	5.27138	5.2714	0.05WT	22	2.184584286	0.975753038	3	1	3 WT
940	149	9790	7	10	154	0:00:21-0:00:22	22	0	HET	12:58.0	9.46234	9.46238	0.0-HET	22	0.285575571	0.431816887	3	1	3 HET
941	150	9856	7	14	158	0:00:21-0:00:22	22	0.5	HOM	12:58.0	5.07482	5.07484	0.5HOM	22	2.723723571	1.210933561	3	1	3 HOM
942	151	9922	7	15	159	0:00:21-0:00:22	22	0.5	WT	12:58.0	2.6166	2.61661	0.5WT	22	1.880752	1.51448201	3	0	3 WT
943	152	9988	7	16	160	0:00:21-0:00:22	22	0.5	HET	12:58.0	3.6831	3.68312	0.5HET	22	2.221199	1.880551301	3	0	3 HET
944	153	10054	7	17	161	0:00:21-0:00:22	22	0.5	HOM	12:58.0	9.84889	9.84893	0.5HOM	22	4.51535	1.332800125	3	1	3 HOM
945	156	10252	7	20	164	0:00:21-0:00:22	22	0.1	HOM	12:58.0	3.78213	3.78214	0.1HOM	22	3.903469857	4.587065004	3	0	3 HOM
946	157	10318	7	21	165	0:00:21-0:00:22	22	0.1	WT	12:58.0	1.99026	1.99026	0.1WT	22	2.886608714	2.935351973	3	0	3 WT
947	158	10384	7	22	166	0:00:21-0:00:22	22	0.1	HET	12:58.0	9.05068	9.05072	0.1HET	22	1.800143286	2.223983673	3	1	3 HET
948	159	10450	7	23	167	0:00:21-0:00:22	22	0.1	HOM	12:58.0	3.02701	3.02702	0.1HOM	22	1.021409429	1.071840721	3	0	3 HOM
949	160	10516	8	1	169	0:00:21-0:00:22	22	0.1	HOM	12:59.0	3.48161	3.48163	0.1HOM	22	1.593846714	0.846523033	3	0	3 HOM
950	161	10582	8	2	170	0:00:21-0:00:22	22	0.1	WT	12:59.0	0.0619477	0.0619478	0.1WT	22	0.109340143	0.289286826	3	0	3 WT
951	162	10648	8	3	171	0:00:21-0:00:22	22	0.1	HET	12:59.0	7.43172	7.43175	0.1HET	22	0.650460286	0.761144844	3	1	3 HET
952	163	10714	8	4	172	0:00:21-0:00:22	22	0.1	HOM	12:59.0	4.31558	4.3156	0.1HOM	22	2.855192714	1.342471596	3	0	3 HOM
953	165	10846	8	6	174	0:00:21-0:00:22	22	0.1	HET	12:59.0	4.07267	4.07268	0.1HET	22	0.949679357	0.80002752	3	0	3 HET
954	166	10912	8	7	175	0:00:21-0:00:22	22	0.05	HOM	12:59.0	5.43194	5.43196	0.05HOM	22	0.897638971	0.799453368	3	1	3 HOM
955	167	10978	8	8	176	0:00:21-0:00:22	22	0.05	WT	12:59.0	6.13641	6.13644	0.05WT	22	2.116546286	1.467558586	3	1	3 WT
956	168	11044	8	9	177	0:00:21-0:00:22	22	0.05	HET	12:59.0	6.24406	6.24409	0.05HET	22	0.316620429	0.223434385	3	1	3 HET
957	169	11110	8	10	178	0:00:21-0:00:22	22	0.05	HOM	12:59.0	6.3808	6.38083	0.05HOM	22	1.503959286	1.005175263	3	1	3 HOM
958	170	11176	8	11	179	0:00:21-0:00:22	22	0.05	WT	12:59.0	7.26274	7.26277	0.05WT	22	2.57616	1.577066033	3	1	3 WT
959	171	11242	8	12	180	0:00:21-0:00:22	22	0.05	HET	12:59.0	5.64986	5.64988	0.05HET	22	1.980208571	0.743320723	3	1	3 HET
960	172	11308	8	13	181	0:00:21-0:00:22	22	0	HOM	12:59.0	6.13125	6.13127	0.0-HOM	22	3.778705714	1.633009605	3	1	3 HOM
961	173	11374	8	14	182	0:00:21-0:00:22	22	0	WT	12:59.0	7.09151	7.09154	0.0-WT	22	1.225098857	0.944735915	3	1	3 WT
962	174	11440	8	15	183	0:00:21-0:00:22	22	0	HET	12:59.0	9.88408	9.88411	0.0-HET	22	2.904332286	2.629738354	3	1	3 HET
963	175	11506	8	16	184	0:00:21-0:00:22	22	0	HOM	12:59.0	7.2125	7.21253	0.0-HOM	22	2.340171429	1.221215019	3	1	3 HOM
964	176	11572	8	17	185	0:00:21-0:00:22	22	0	WT	12:59.0	0.247634	0.247635	0.0-WT	22	1.336164	0.994194907	3	0	3 WT
965	177	11638	8	19	187	0:00:21-0:00:22	22	0.5	HOM	12:59.0	0.460996	0.460998	0.5HOM	22	0	0	3	0	3 HOM
966	178	11704	8	20	188	0:00:21-0:00:22	22	0.5	WT	12:59.0	2.61958	2.61959	0.5WT	22	2.919832857	0.713807585	3	0	3 WT
967	179	11770	8	21	189	0:00:21-0:00:22	22	0.5	HET	12:59.0	0.227543	0.227544	0.5HET	22	0.132793171	0.023910874	3	0	3 HET
968	181	11902	8	23	191	0:00:21-0:00:22	22	0.5	WT	12:59.0	2.44619	2.4462	0.5WT	22	2.243468714	2.029499897	3	0	3 WT
969	182	11968	8	24	192	0:00:21-0:00:22	22	0.5	HET	12:59.0	1.40586	1.40587	0.5HET	22	0.127662129	0.067692967	3	0	3 HET
970	186	12232	9	4	196	0:00:21-0:00:22	22	0	WT	13:00.0	5.55914	5.55917	0.0-WT	22	0.955870286	0.773719706	3	1	3 WT
971	187	12298	9	5	197	0:00:21-0:00:22	22	0	HET	13:00.0	6.04877	6.04878	0.0-HET	22	1.379209714	0.955976944	3	1	3 HET
972	188	12364	9	6	198	0:00:21-0:00:22	22	0	HOM	13:00.0	4.68939	4.68941	0.0-HOM	22	0.175336	0.256626328	3	1	3 HOM
973	189	12430	9	7	199	0:00:21-0:00:22	22	0.05	WT	13:00.0	8.20957	8.2096	0.05WT	22	2.667998571	1.064283782	3	1	3 WT
974	191	12562	9	10	202	0:00:21-0:00:22	22	0.05	WT	13:00.0	9.22865	9.22869	0.05WT	22	3.557647143	1.465747329	3	1	3 WT
975	192	12628	9	11	203	0:00:21-0:00:22	22	0.05	HET	13:00.0	6.4332	6.43322	0.05HET	22	0.203747286	0.063253295	3	1	3 HET
976	193	12694	9	12	204	0:00:21-0:00:22	22	0.05	HOM	13:00.0	4.02694	4.02696	0.05HOM	22	2.032254	1.269137455	3	0	3 HOM
977	194	12760	9	13	205	0:00:21-0:00:22	22	0.1	WT	13:00.0	4.96111	4.96113	0.1WT	22	1.968111	1.479421564	3	1	3 WT
978	195	12826	9	14	206	0:00:21-0:00:22	22	0.1	HET	13:00.0	6.37085	6.37088	0.1HET	22	1.529421857	0.500326591	3	1	3 HET
979	196	12892	9	15	207	0:00:21-0:00:22	22	0.1	HOM	13:00.0	6.7788	6.77883	0.1HOM	22	4.94337	1.195306503	3	1	3 HOM
980	197	12958	9	16	208	0:00:21-0:00:22	22	0.1	WT	13:00.0	3.46134	3.46135	0.1WT	22	1.411252143	0.769107686	3	0	3 WT
981	198	13024	9	17	209	0:00:21-0:00:22	22	0.1	HET	13:00.0	4.55595	4.55597	0.1HET	22	1.98885	0.747318271	3	0	3 HET
982	199	13090	9	18	210	0:00:21-0:00:22	22	0.1	HOM	13:00.0	3.87354	3.87356	0.1HOM	22	1.219181014	0.832128407	3	0	3 HOM
983	200	13156	9	19	211	0:00:21-0:00:22	22	0.5	WT	13:00.0	2.97305	2.97307	0.5WT	22	1.003829857	0.136115708	3	0	3 WT
984	202	13288	9	21	213	0:00:21-0:00:22	22	0.5	HOM	13:00.0	7.40049	7.40052	0.5HOM	22	0	0	3	1	3 HOM
985	204	13420	9	23	215	0:00:21-0:00:22	22	0.5	HET	13:00.0	2.80312	2.80313	0.5HET	22	2.115048	0.958390913	3	0	3 HET
986	205	13486	9	24	216	0:00:21-0:00:22	22	0.5	HOM	13:00.0	3.14379	3.14381	0.5HOM	22	3.720442857	1.330477756	3	0	3 HOM
987	208	13684	10	3	219	0:00:21-0:00:22	22	0.5	WT	13:01.0	3.03727	3.03728	0.5WT	22	0.209971286	0.037172714	3	0	3 WT
988	210	13816	10	5	221	0:00:21-0:00:22	22	0.5	HET	13:01.0	5.4538	5.64188	0.5HET	22	1.844090857	0.983350064	3	1	3 HET
989	211	13882	10	6	222	0:00:21-0:00:22	22	0.5	WT	13:01.0	0.162734	0.162735	0.5WT	22	0	0	3	0	3 WT
990	213	14014	10	8	224	0:00:21-0:00:22	22	0.1	HET	13:01.0	0.531091	0.531094	0.1HET	22	0.546414714	0.403014291	3	0	3 HET
991	214	14080	10	9	225	0:00:21-0:00:22	22	0.1	WT	13:01.0	2.12188	2.12189	0.1WT	22	2.584802857	1.428263162	3	0	3 WT
992	215	14146	10	10	226	0:00:21-0:00:22	22	0.1	HOM	13:01.0	5.20012	5.20014	0.1HOM	22	2.879014357	4.5680578	3	1	3 HOM
993	217	14278	10	12	228	0:00:21-0:00:22	22	0.1	WT	13:01.0	0.283228	0.283229	0.1WT	22	1.961622143	1.97381419	3	0	3 WT
994	219	14410	10	14	230	0:00:21-0:00:22	22	0.05	HET	13:01.0	9.2624	9.26243	0.05HET	22	2.604767143	0.948816529	3	1	3 HET
995	220	14476	10	15	231	0:00:21-0:00:22	22	0.05	WT	13:01.0	0.526643	0.526646	0.05WT	22	1.750391429	0.571549178	3	0	3 WT
996	221	14542	10	16	232	0:00:21-0:00:22	22	0.05	HOM	13:01.0	5.81264	5.81267	0.05HOM	22	0.325223686	0.318979473	3	1	3 HOM
997	222	14608	10	18	234	0:00:21-0:00:22	22	0.05	WT	13:01.0	3.95858	3.9586	0.05WT	22	2.8635	0.992887729	3	0	3 WT
998	224	14740	10	20	236	0:00:21-0:00:22	22	0	HET	13:01.0	4.20018	4.2002	0.0-HET	22	0.911720857	0.63114733	3	0	3 HET
999	226	14872	10	22	238	0:00:21-0:00:22	22	0	HOM	13:01.0	6.88405	6.88407	0.0-HOM	22	1.955062857	0.990254499	3	1	3 HOM
1000	227	14938	10	23	239	0:00:21-0:00:22	22	0	HET	13:01.0	2.97549	2.9755	0.0-HET	22	1.008678571	0.418522585	3	0	3 HET
1001	228	15004	10	24	240	0:00:21-0:00:22	22	0	WT	13:01.0	0.189739	0.18974	0.0-WT	22	2.173942286	1.789427222	3	0	3 WT
1002	229	15070	11	1	241	0:00:21-0:00:22	22	0.05	HET	13:03.0	6.18242	6.18244	0.05HET	22	2.911951286	2.38134668	3	1	3 HET
1003	230	15136	11	2	242	0:00:21-0:00:22	22	0.05	HOM	13:03.0	1.68713	1.68714	0.05HOM	22	0.4094815	0.50135872	3	0	3 HOM
1004	231	15202	11	3	243	0:00:21-0:00:22	22	0.05	WT	13:03.0	7.52029	7.52033	0.05WT	22	1.758758571	1.23806334	3	1	3 WT
1005	232	15268	11	4	244	0:00:21-0:00:22	22	0.05	HET	13:03.0	5.11513	5.11515	0.05HET	22	2.925303143	1.145086292	3	1	3 HET
1006	233	15334	11	5	245	0:00:21-0:00:22	22	0.05	HOM	13:03.0	5.32916	5.32918	0.05HOM	22	1.516169857	1.269282766	3	1	3 HOM
1007	234	15400	11	6	246	0:00:21-0:00:22	22	0.05	WT	13:03.0	3.70087	3.70089	0.05WT	22	1.171690143	0.540371432	3	0	3 WT
1008	235	15466	11	7	247	0:00:21-0:00:22	22	0	HET	13:03.0	4.83759	4.83761	0.0-HET	22	0.534916443	0.388884892	3	1	3 HET
1009	236	15532	11	8	248	0:00:21-0:00:22	22	0	HOM	13:03.0	0.441191	0.441193	0.0-HOM	22	0.233586243	0.126148153	3	0	3 HOM
1010	237	15598	11	9	249	0:00:21-0:00:22	22	0	WT	13:03.0	4.73911	4.73913	0.0-WT	22	0	0	3	1	3 WT
1011	238	15664	11	10	250	0:00:21-0:00:22	22	0	HET	13:03.0	5.70928	5.7093	0.0-HET	22	1.192299714	1.569545383	3	1	3 HET
1012	239	15730	11	11	251	0:00:21-0:00:22	22	0	HOM	13:03.0	5.71072	5.71074	0.0-HOM	22	4.36581	3.033869983	3	1	3 HOM
1013	240	15796	11	12	252	0:00:21-0:00:22	22	0	WT	13:03.0	7.17174	7.17177	0.0-WT	22	2.863136143	1.808829927	3	1	3 WT
1014	241	15862	11	13	253	0:00:21-0:00:22	22	0.5	HET	13:03.0	0.426577	0.426579	0.5HET	22	0.603621714	0.113609504	3	0	3 HET
1015	243	15994	11	15	255	0:00:21-0:00:22	22	0.5	WT	13:03.0	1.47499	1.475	0.5WT	22	2.220864286	0.675086586	3	0	3 WT
1016	244	16060	11	16	256	0:00:21-0:00:22	22	0.5	HET	13:03.0	2.20004	2.20005	0.5HET	22	2.40336	1.527346665	3	0	3 HET
1017	245	16126	11	17	257	0:00:21-0:00:22	22	0.5	HOM	13:03.0	2.6905	2.69052	0.5HOM	22	3.940088571	2.473759295	3	0	3 HOM
1018	246	16192	11	18	258	0:00:21-0:00:22	22	0.5	WT	13:03.0	4.82718	4.8272	0.5WT	22	2.534458857	1.562465359	3	1	3 WT
1019	247	16258	11	19	259	0:00:21-0:00:22	22	0.1	HET	13:03.0	7.91116	7.91119	0.1HET	22	1.483819429	0.70327409	3	1	3 HET
1020	248	16324	11	20	260	0:00:21-0:00:22	22	0.1	HOM	13:03.0	1.02912	1.02912	0.1HOM	22	0.0456878	0.097142031	3	0	3 HOM
1021	249	16390	11	21	261	0:00:21-0:00:22	22	0.1	WT	13:03.0	1.55549	1.5555	0.1WT	22	0.058464801	0.094748498	3	0	3 WT
1022	250	16456	11	22	262	0:00:21-0:00:22	22	0.1	HET	13:03.0	5.92448	5.9245	0.1HET	22	0.906252857	0.794057434	3	1	3 HET
1023	251	16522	11	23	263	0:00:21-0:00:22	22	0.1	HOM	13:03.0	1.41201	1.41202	0.1HOM	22	1.382247857	0.297391816	3	0	3 HOM
1024	252	16588	11	24	264	0:00:21-0:00:22	22	0.1	WT	13:03.0	3.18439	3.18441	0.1WT	22	1.829352286	1.141634119	3	0	3 WT
1025	253	16654	12	1	265	0:00:21-0:00:22	22	0.1	HOM	13:03.0	3.44239	3.44241	0.1HOM	22	2.392802857	0.634858216	3	0	3 HOM
1026	254	16720	12	2	266	0:00:21-0:00:22	22	0.1	WT	13:03.0	3.52608	3.5261	0.1WT	22	3.945447143	2.654153763	3	0	3 WT
1027	255	16786	12	3	267	0:00:21-0:00:22	22	0.1	HET	13:03.0	0.783593	0.783596	0.1HET	22	1.208657714	0.720422302	3	0	3 HET
1028	258	16984	12	6	270	0:00:21-0:00:22	22	0.1	HET	13:03.0	4.16647	4.16648	0.1HET	22	1.375691714	1.322622114	3	0	3 HET
1029	260	17116	12	8	272	0:00:21-0:00:22	22	0.05	WT	13:03.0	7.79397	7.794	0.05WT	22	2.837144286	0.901900947	3	1	3 WT
1030	261	17182	12	9	273	0:00:21-0:00:22	22	0.05	HET	13:03.0	2.05219	2.0522	0.05HET	22	1.754498	1.683756845	3	0	3 HET
1031	262	17248	12	11	275	0:00:21-0:00:22	22	0.05	WT	13:03.0	5.27508	5.27511	0.05WT	22	1.868566571	2.240733401	3	1	3 WT
1032	264	17380	12	13	277	0:00:21-0:00:22	22	0	HOM	13:03.0	6.65167	6.65169	0.0-HOM	22	2.024857857	1.061040349	3	1	3 HOM
1033	265	17446	12	14	278	0:00:21-0:00:22	22	0	WT	13:03.0	4.98677	4.98679	0.0-WT	22	3.012535143	2.027379406	3	1	3 WT
1034	266	17512	12	15	279	0:00:21-0:00:22	22	0	HET	13:03.0	0.298377	0.298378	0.0-HET	22	0.243097857	0.064655057	3	0	3 HET
1035	267	17578	12	16	280	0:00:21-0:00:22	22	0	HOM	13:03.0	8.2967	8.29674	0.0-HOM	22	0.309036571	0.056648521	3	1	3 HOM
1036	268	17644	12	17	281	0:00:21-0:00:22	22	0	WT	13:03.0	0.680252	0.680253	0.0-WT	22	2.733588843	3.15679764	3	0	3 WT
1037	271	17842	12	20	284	0:00:21-0:00:22	22	0.5	WT	13:03.0	4.97297	4.97299	0.5WT	22	2.579924286	0.920888844	3	1	3 WT
1038	272	17908	12	21	285	0:00:21-0:00:22	22	0.5	HET	13:03.0	8.886	8.88604	0.5HET	22	3.487605714	1.444416381	3	1	3 HET
1039	274	18040	12	23	287	0:00:21-0:00:22	22	0.5	WT	13:03.0	0.282301	0.282301	0.5WT	22	1.560275857	0.86528225	3	0	3 WT
1040	276	18172	1	1	1	0:00:21-0:00:22	22	0	WT	27:35.0	2.15031	2.15032	0.0-WT	22	0.801322781	0.673350202	3	0	3 WT
1041	277	18238	1	2	2	0:00:21-0:00:22	22	0	HET	27:35.0	1.84541	1.84541	0.0-HET	22	0.163810429	0.064965735	3	0	3 HET
1042	278	18304	1	3	3	0:00:21-0:00:22	22	0	HOM	27:35.0	6.88355	6.88358	0.0-HOM	22	2.488771143	1.164110607	3	1	3 HOM
1043	279	18370	1	4	4	0:00:21-0:00:22	22	0	WT	27:35.0	0.191331	0.191332	0.0-WT	22	0.235994971	0.217527265	3	0	3 WT
1044	280	18436	1	5	5	0:00:21-0:00:22	22	0	HET	27:35.0	0.604993	0.604996	0.0-HET	22	0.224115	0.036495489	3	0	3 HET
1045	281	18502	1	6	6	0:00:21-0:00:22	22	0	HOM	27:35.0	4.93215	4.93217	0.0-HOM	22	0.505809371	0.26143492	3	1	3 HOM
1046	282	18568	1	7	7	0:00:21-0:00:22	22	0.05	WT	27:35.0	3.51938	3.51939	0.05WT	22	1.892991	1.198148389	3	0	3 WT
1047	283	18634	1	8	8	0:00:21-0:00:22	22	0.05	HET	27:35.0	2.29753	2.29754	0.05HET	22	2.039051429	1.755701919	3	0	3 HET
1048	285	18766	1	10	10	0:00:21-0:00:22	22	0.05	WT	27:35.0	5.34434	5.34436	0.05WT	22	4.268077143	2.122971174	3	1	3 WT
1049	286	18832	1	11	11	0:00:21-0:00:22	22	0.05	HET	27:35.0	4.91665	4.91667	0.05HET	22	0.301975243	0.146940013	3	1	3 HET
1050	287	18898	1	12	12	0:00:21-0:00:22	22	0.05	HOM	27:35.0	7.94383	7.94385	0.05HOM	22	1.935541286	1.193304716	3	1	3 HOM
1051	292	19228	1	17	17	0:00:21-0:00:22	22	0.1	HET	27:35.0	1.5578	1.55781	0.1HET	22	1.933311429	0.46450913	3	0	3 HET
1052	293	19294	1	18	18	0:00:21-0:00:22	22	0.1	HOM	27:35.0	1.97253	1.97254	0.1HOM	22	1.292337286	0.717589688	3	0	3 HOM
1053	295	19426	1	21	21	0:00:21-0:00:22	22	0.5	HOM	27:35.0	4.70301	4.70302	0.5HOM	22	3.443564286	1.917945882	3	1	3 HOM
1054	296	19492	1	22	22	0:00:21-0:00:22	22	0.5	WT	27:35.0	4.74854	4.74856	0.5WT	22	0.274021571	0.106959045	3	1	3 WT
1055	298	19624	1	24	24	0:00:21-0:00:22	22	0.5	HOM	27:35.0	2.55973	2.55974	0.5HOM	22	2.740044286	1.10133717	3	0	3 HOM
1056	299	19690	2	1	25	0:00:21-0:00:22	22	0.5	HOM	32:40.0	4.15266	4.15267	0.5HOM	22	1.538928957	1.121068475	3	0	3 HOM
1057	300	19756	2	2	26	0:00:21-0:00:22	22	0.5	HET	32:40.0	8.02031	8.02035	0.5HET	22	3.142895714	1.05853828	3	1	3 HET
1058	301	19822	2	3	27	0:00:21-0:00:22	22	0.5	WT	32:40.0	3.36759	3.3676	0.5WT	22	1.933544286	0.539906297	3	0	3 WT
1059	302	19888	2	4	28	0:00:21-0:00:22	22	0.5	HOM	32:40.0	3.95021	3.95023	0.5HOM	22	1.2246762	1.122929069	3	0	3 HOM
1060	304	20020	2	6	30	0:00:21-0:00:22	22	0.5	WT	32:40.0	1.42261	1.42262	0.5WT	22	1.760221429	1.50419859	3	0	3 WT
1061	305	20086	2	7	31	0:00:21-0:00:22	22	0.1	HOM	32:40.0	4.00404	4.00406	0.1HOM	22	1.123118143	0.992475164	3	0	3 HOM
1062	306	20152	2	8	32	0:00:21-0:00:22	22	0.1	HET	32:40.0	9.71681	9.71685	0.1HET	22	2.388199714	1.808957235	3	1	3 HET
1063	307	20218	2	9	33	0:00:21-0:00:22	22	0.1	WT	32:40.0	5.18569	5.18571	0.1WT	22	0.077457057	0.018130441	3	1	3 WT
1064	308	20284	2	10	34	0:00:21-0:00:22	22	0.1	HOM	32:40.0	0.875644	0.875648	0.1HOM	22	2.768916429	1.993770189	3	0	3 HOM
1065	310	20416	2	12	36	0:00:21-0:00:22	22	0.1	WT	32:40.0	0.0437507	0.0437508	0.1WT	22	0.060666271	0.029478073	3	0	3 WT
1066	311	20482	2	13	37	0:00:21-0:00:22	22	0.05	HOM	32:40.0	2.13114	2.13114	0.05HOM	22	2.060246571	1.726436057	3	0	3 HOM
1067	313	20614	2	17	41	0:00:21-0:00:22	22	0.05	HET	32:40.0	5.2317	5.23173	0.05HET	22	0.543101886	0.355257238	3	1	3 HET
1068	314	20680	2	18	42	0:00:21-0:00:22	22	0.05	WT	32:40.0	3.92706	3.92708	0.05WT	22	1.550958286	1.098421085	3	0	3 WT
1069	315	20746	2	19	43	0:00:21-0:00:22	22	0	HOM	32:40.0	0	-	0.0-HOM	22	1.119408286	0.788965624	3	0	3 HOM
1070	316	20812	2	20	44	0:00:21-0:00:22	22	0	HET	32:40.0	5.76391	5.76393	0.0-HET	22	2.934715714	0.639889361	3	1	3 HET
1071	317	20878	2	21	45	0:00:21-0:00:22	22	0	WT	32:40.0	4.15057	4.15059	0.0-WT	22	3.699627143	2.272381261	3	0	3 WT
1072	318	20944	2	22	46	0:00:21-0:00:22	22	0	HOM	32:40.0	1.74688	1.74689	0.0-HOM	22	1.572600714	1.184943005	3	0	3 HOM
1073	319	21010	2	23	47	0:00:21-0:00:22	22	0	HET	32:40.0	5.87701	5.87703	0.0-HET	22	2.357226286	1.315801173	3	1	3 HET
1074	320	21076	2	24	48	0:00:21-0:00:22	22	0	WT	32:40.0	5.00207	5.00209	0.0-WT	22	0	0	3	1	3 WT
1075	322	21208	3	2	50	0:00:21-0:00:22	22	0.05	HOM	34:27.0	7.14577	7.1458	0.05HOM	22	0.647376	0.584247193	3	1	3 HOM
1076	323	21274	3	3	51	0:00:21-0:00:22	22	0.05	WT	34:27.0	0.395372	0.395375	0.05WT	22	0.341070286	0.133718853	3	0	3 WT
1077	324	21340	3	4	52	0:00:21-0:00:22	22	0.05	HET	34:27.0	4.94029	4.94031	0.05HET	22	0.706166143	0.242854386	3	1	3 HET
1078	325	21406	3	5	53	0:00:21-0:00:22	22	0.05	HOM	34:27.0	4.50808	4.50809	0.05HOM	22	2.345938143	1.274259289	3	0	3 HOM
1079	328	21604	3	8	56	0:00:21-0:00:22	22	0	HOM	34:27.0	5.43319	5.43321	0.0-HOM	22	1.570321714	1.186172665	3	1	3 HOM
1080	329	21670	3	9	57	0:00:21-0:00:22	22	0	WT	34:27.0	5.52231	5.52234	0.0-WT	22	1.078725386	0.90602774	3	1	3 WT
1081	331	21802	3	11	59	0:00:21-0:00:22	22	0	HOM	34:27.0	5.1848	5.18482	0.0-HOM	22	1.684990714	0.68590983	3	1	3 HOM
1082	332	21868	3	12	60	0:00:21-0:00:22	22	0	WT	34:27.0	0.3111	0.311102	0.0-WT	22	0.266722586	0.088479771	3	0	3 WT
1083	333	21934	3	13	61	0:00:21-0:00:22	22	0.5	HET	34:27.0	3.16938	7.31398	0.5HET	22	0	0	3	0	3 HET
1084	334	22000	3	14	62	0:00:21-0:00:22	22	0.5	HOM	34:27.0	4.78869	4.78871	0.5HOM	22	3.065151	2.623836642	3	1	3 HOM
1085	335	22066	3	15	63	0:00:21-0:00:22	22	0.5	WT	34:27.0	1.43221	1.43221	0.5WT	22	1.369665714	2.05538301	3	0	3 WT
1086	336	22132	3	16	64	0:00:21-0:00:22	22	0.5	HET	34:27.0	6.03138	6.03141	0.5HET	22	2.412841429	1.000146156	3	1	3 HET
1087	337	22198	3	17	65	0:00:21-0:00:22	22	0.5	HOM	34:27.0	1.53946	1.53946	0.5HOM	22	1.022981286	0.8599461	3	0	3 HOM
1088	339	22330	3	19	67	0:00:21-0:00:22	22	0.1	HET	34:27.0	2.52862	2.52863	0.1HET	22	0.257138	0.374345331	3	0	3 HET
1089	340	22396	3	20	68	0:00:21-0:00:22	22	0.1	HOM	34:27.0	5.35853	5.35855	0.1HOM	22	4.552258571	2.337052578	3	1	3 HOM
1090	341	22462	3	21	69	0:00:21-0:00:22	22	0.1	WT	34:27.0	2.51911	2.51912	0.1WT	22	0.408891043	0.400085247	3	0	3 WT
1091	342	22528	3	22	70	0:00:21-0:00:22	22	0.1	HET	34:27.0	5.19002	5.19004	0.1HET	22	3.091085286	1.921785279	3	1	3 HET
1092	343	22594	3	23	71	0:00:21-0:00:22	22	0.1	HOM	34:27.0	0	-	0.1HOM	22	0	0	3	0	3 HOM
1093	344	22660	3	24	72	0:00:21-0:00:22	22	0.1	WT	34:27.0	2.47358	2.47359	0.1WT	22	1.942092857	0.980518744	3	0	3 WT
1094	345	22726	4	1	73	0:00:21-0:00:22	22	0.1	HOM	34:29.0	2.93955	2.93956	0.1HOM	22	2.416478286	1.132929452	3	0	3 HOM
1095	346	22792	4	3	75	0:00:21-0:00:22	22	0.1	HET	34:29.0	6.06918	6.0692	0.1HET	22	2.678828571	0.912992859	3	1	3 HET
1096	347	22858	4	4	76	0:00:21-0:00:22	22	0.1	HOM	34:29.0	2.09994	2.09995	0.1HOM	22	1.409958429	0.69717685	3	0	3 HOM
1097	348	22924	4	5	77	0:00:21-0:00:22	22	0.1	WT	34:29.0	0.159343	0.159343	0.1WT	22	0.185796757	0.061208163	3	0	3 WT
1098	349	22990	4	6	78	0:00:21-0:00:22	22	0.1	HET	34:29.0	3.8415	3.84151	0.1HET	22	1.293036571	0.87054493	3	0	3 HET
1099	350	23056	4	7	79	0:00:21-0:00:22	22	0.05	HOM	34:29.0	9.70992	9.70996	0.05HOM	22	0	0	3	1	3 HOM
1100	351	23122	4	8	80	0:00:21-0:00:22	22	0.05	WT	34:29.0	0.341252	0.341253	0.05WT	22	0.251510857	0.081753992	3	0	3 WT
1101	352	23188	4	9	81	0:00:21-0:00:22	22	0.05	HET	34:29.0	4.41837	4.41839	0.05HET	22	3.177642857	0.803406579	3	0	3 HET
1102	353	23254	4	10	82	0:00:21-0:00:22	22	0.05	HOM	34:29.0	3.14027	3.14029	0.05HOM	22	1.755331714	0.810469759	3	0	3 HOM
1103	357	23518	4	14	86	0:00:21-0:00:22	22	0	WT	34:29.0	6.18747	6.1875	0.0-WT	22	3.632434286	1.566236106	3	1	3 WT
1104	358	23584	4	15	87	0:00:21-0:00:22	22	0	HET	34:29.0	6.24242	6.24245	0.0-HET	22	0.601811571	0.490743471	3	1	3 HET
1105	359	23650	4	17	89	0:00:21-0:00:22	22	0	WT	34:29.0	7.11844	7.11847	0.0-WT	22	1.522209	0.981357487	3	1	3 WT
1106	360	23716	4	18	90	0:00:21-0:00:22	22	0	HET	34:29.0	3.10166	3.10168	0.0-HET	22	1.577842571	0.951897102	3	0	3 HET
1107	361	23782	4	19	91	0:00:21-0:00:22	22	0.5	HOM	34:29.0	5.10373	5.10375	0.5HOM	22	1.487772	1.748051726	3	1	3 HOM
1108	363	23914	4	21	93	0:00:21-0:00:22	22	0.5	HET	34:29.0	5.83915	5.83918	0.5HET	22	1.641836286	1.098903873	3	1	3 HET
1109	364	23980	4	22	94	0:00:21-0:00:22	22	0.5	HOM	34:29.0	1.52674	1.52674	0.5HOM	22	0.192014857	0.045201036	3	0	3 HOM
1110	365	24046	4	23	95	0:00:21-0:00:22	22	0.5	WT	34:29.0	5.7019	5.70192	0.5WT	22	0.487945286	0.556373516	3	1	3 WT
1111	366	24112	4	24	96	0:00:21-0:00:22	22	0.5	HET	34:29.0	0.443082	0.443084	0.5HET	22	0	0	3	0	3 HET
1112	367	24178	5	2	98	0:00:21-0:00:22	22	0	HET	34:30.0	4.99188	4.99189	0.0-HET	22	0	0	3	1	3 HET
1113	368	24244	5	3	99	0:00:21-0:00:22	22	0	HOM	34:30.0	6.20844	6.20847	0.0-HOM	22	1.844229143	0.865538789	3	1	3 HOM
1114	370	24376	5	8	104	0:00:21-0:00:22	22	0.05	HET	34:30.0	2.37731	2.37732	0.05HET	22	0	0	3	0	3 HET
1115	372	24508	5	11	107	0:00:21-0:00:22	22	0.05	HET	34:30.0	3.76493	3.76494	0.05HET	22	2.445215286	2.63914923	3	0	3 HET
1116	375	24706	5	14	110	0:00:21-0:00:22	22	0.1	HET	34:30.0	3.26717	3.26718	0.1HET	22	2.717921429	1.717109229	3	0	3 HET
1117	376	24772	5	15	111	0:00:21-0:00:22	22	0.1	HOM	34:30.0	0.124591	0.124591	0.1HOM	22	1.323639429	1.024246744	3	0	3 HOM
1118	378	24904	5	17	113	0:00:21-0:00:22	22	0.1	HET	34:30.0	5.00196	5.00198	0.1HET	22	0.478415657	0.859803719	3	1	3 HET
1119	379	24970	5	18	114	0:00:21-0:00:22	22	0.1	HOM	34:30.0	10.6099	10.6099	0.1HOM	22	3.544155714	1.370413137	3	1	3 HOM
1120	382	25168	5	21	117	0:00:21-0:00:22	22	0.5	HOM	34:30.0	4.96618	4.96621	0.5HOM	22	6.449035714	2.875613417	3	1	3 HOM
1121	388	25564	6	3	123	0:00:21-0:00:22	22	0.5	WT	34:31.1	0.0504948	0.0504951	0.5WT	22	1.254090143	1.09461903	3	0	3 WT
1122	390	25696	6	5	125	0:00:21-0:00:22	22	0.5	HET	34:31.1	7.70829	7.70832	0.5HET	22	5.548232857	2.621915632	3	1	3 HET
1123	391	25762	6	6	126	0:00:21-0:00:22	22	0.5	WT	34:31.1	4.59179	4.5918	0.5WT	22	0.284694286	0.083926684	3	0	3 WT
1124	394	25960	6	10	130	0:00:21-0:00:22	22	0.1	HOM	34:31.1	6.73727	6.7373	0.1HOM	22	2.222066286	1.250461419	3	1	3 HOM
1125	396	26092	6	12	132	0:00:21-0:00:22	22	0.1	WT	34:31.1	0.0409922	0.0409925	0.1WT	22	0.123595614	0.081917985	3	0	3 WT
1126	398	26224	6	14	134	0:00:21-0:00:22	22	0.05	HET	34:31.1	5.72227	5.7223	0.05HET	22	1.062497143	1.699373055	3	1	3 HET
1127	402	26488	6	18	138	0:00:21-0:00:22	22	0.05	WT	34:31.1	2.4702	2.47021	0.05WT	22	1.961766286	1.142941225	3	0	3 WT
1128	404	26620	6	20	140	0:00:21-0:00:22	22	0	HET	34:31.1	5.15339	5.15341	0.0-HET	22	2.683890286	3.117624921	3	1	3 HET
1129	405	26686	6	21	141	0:00:21-0:00:22	22	0	WT	34:31.1	6.02193	6.02195	0.0-WT	22	2.749578571	1.04109058	3	1	3 WT
1130	406	26752	6	22	142	0:00:21-0:00:22	22	0	HOM	34:31.1	6.80467	6.80469	0.0-HOM	22	3.459727143	0.906673772	3	1	3 HOM
1131	407	26818	6	23	143	0:00:21-0:00:22	22	0	HET	34:31.1	0.199	0.199001	0.0-HET	22	0.184876429	0.079722989	3	0	3 HET
1132	408	26884	7	1	145	0:00:21-0:00:22	22	0.05	HET	34:32.1	0.798425	0.798429	0.05HET	22	0.225916143	0.066528201	3	0	3 HET
1133	409	26950	7	2	146	0:00:21-0:00:22	22	0.05	HOM	34:32.1	3.30504	3.30505	0.05HOM	22	4.149767143	1.545972407	3	0	3 HOM
1134	410	27016	7	3	147	0:00:21-0:00:22	22	0.05	WT	34:32.1	3.76288	3.7629	0.05WT	22	2.430496157	1.809683959	3	0	3 WT
1135	411	27082	7	4	148	0:00:21-0:00:22	22	0.05	HET	34:32.1	7.84625	7.84629	0.05HET	22	0.813561029	1.052858082	3	1	3 HET
1136	412	27148	7	5	149	0:00:21-0:00:22	22	0.05	HOM	34:32.1	8.2227	8.22273	0.05HOM	22	2.453819286	1.704826601	3	1	3 HOM
1137	415	27346	7	8	152	0:00:21-0:00:22	22	0	HOM	34:32.1	4.3936	4.39362	0.0-HOM	22	0	0	3	0	3 HOM
1138	416	27412	7	9	153	0:00:21-0:00:22	22	0	WT	34:32.1	7.30678	7.30681	0.0-WT	22	3.54386	1.28892968	3	1	3 WT
1139	417	27478	7	10	154	0:00:21-0:00:22	22	0	HET	34:32.1	5.75296	5.75298	0.0-HET	22	1.655349857	1.267898776	3	1	3 HET
1140	418	27544	7	11	155	0:00:21-0:00:22	22	0	HOM	34:32.1	10.3631	10.3631	0.0-HOM	22	0.199838129	0.124432008	3	1	3 HOM
1141	419	27610	7	12	156	0:00:21-0:00:22	22	0	WT	34:32.1	3.97792	3.97794	0.0-WT	22	4.741980057	3.860151174	3	0	3 WT
1142	420	27676	7	13	157	0:00:21-0:00:22	22	0.5	HET	34:32.1	7.95903	7.95905	0.5HET	22	3.37518	1.86058891	3	1	3 HET
1143	422	27808	7	15	159	0:00:21-0:00:22	22	0.5	WT	34:32.1	3.44311	3.44313	0.5WT	22	0	0	3	0	3 WT
1144	427	28138	7	20	164	0:00:21-0:00:22	22	0.1	HOM	34:32.1	6.30136	6.30138	0.1HOM	22	3.098356286	2.045602584	3	1	3 HOM
1145	428	28204	7	21	165	0:00:21-0:00:22	22	0.1	WT	34:32.1	2.44855	2.44855	0.1WT	22	2.629341571	1.186960434	3	0	3 WT
1146	429	28270	7	23	167	0:00:21-0:00:22	22	0.1	HOM	34:32.1	1.76127	1.76128	0.1HOM	22	0.028962456	0.029281924	3	0	3 HOM
1147	431	28402	8	1	169	0:00:21-0:00:22	22	0.1	HOM	34:33.1	8.11856	8.11859	0.1HOM	22	3.814302857	1.519407652	3	1	3 HOM
1148	432	28468	8	2	170	0:00:21-0:00:22	22	0.1	WT	34:33.1	6.81923	6.81926	0.1WT	22	2.770008714	1.532825163	3	1	3 WT
1149	433	28534	8	3	171	0:00:21-0:00:22	22	0.1	HET	34:33.1	4.69312	4.69313	0.1HET	22	1.997442571	1.292430549	3	1	3 HET
1150	436	28732	8	6	174	0:00:21-0:00:22	22	0.1	HET	34:33.1	0.213322	0.213323	0.1HET	22	0.021256989	0.022598218	3	0	3 HET
1151	437	28798	8	7	175	0:00:21-0:00:22	22	0.05	HOM	34:33.1	8.76852	8.76856	0.05HOM	22	1.422668286	0.881241427	3	1	3 HOM
1152	439	28930	8	9	177	0:00:21-0:00:22	22	0.05	HET	34:33.1	6.11	6.11002	0.05HET	22	2.265922857	0.876776458	3	1	3 HET
1153	440	28996	8	10	178	0:00:21-0:00:22	22	0.05	HOM	34:33.1	7.0139	7.01393	0.05HOM	22	1.312080743	1.697046118	3	1	3 HOM
1154	441	29062	8	11	179	0:00:21-0:00:22	22	0.05	WT	34:33.1	3.24471	3.24472	0.05WT	22	1.467365143	0.621054876	3	0	3 WT
1155	442	29128	8	12	180	0:00:21-0:00:22	22	0.05	HET	34:33.1	5.88533	5.88535	0.05HET	22	1.558695571	0.824641664	3	1	3 HET
1156	443	29194	8	13	181	0:00:21-0:00:22	22	0	HOM	34:33.1	3.39407	3.39409	0.0-HOM	22	5.120158571	1.610347867	3	0	3 HOM
1157	444	29260	8	14	182	0:00:21-0:00:22	22	0	WT	34:33.1	7.75069	7.75072	0.0-WT	22	2.417332	1.486829717	3	1	3 WT
1158	445	29326	8	15	183	0:00:21-0:00:22	22	0	HET	34:33.1	0.278243	0.278245	0.0-HET	22	1.015548	0.636303845	3	0	3 HET
1159	446	29392	8	16	184	0:00:21-0:00:22	22	0	HOM	34:33.1	0.134031	0.134032	0.0-HOM	22	0.432392	0.324637049	3	0	3 HOM
1160	448	29524	8	18	186	0:00:21-0:00:22	22	0	HET	34:33.1	6.39729	6.39732	0.0-HET	22	3.167127571	1.983598426	3	1	3 HET
1161	450	29656	8	20	188	0:00:21-0:00:22	22	0.5	WT	34:33.1	2.00172	2.00173	0.5WT	22	2.444854286	1.537210945	3	0	3 WT
1162	451	29722	8	21	189	0:00:21-0:00:22	22	0.5	HET	34:33.1	0.0499385	0.0499385	0.5HET	22	0.129140057	0.032762746	3	0	3 HET
1163	452	29788	8	22	190	0:00:21-0:00:22	22	0.5	HOM	34:33.1	2.23779	2.2378	0.5HOM	22	1.547141971	0.999582456	3	0	3 HOM
1164	453	29854	8	24	192	0:00:21-0:00:22	22	0.5	HET	34:33.1	4.5252	4.52521	0.5HET	22	0.385851857	0.200748566	3	0	3 HET
1165	454	29920	9	1	193	0:00:21-0:00:22	22	0	WT	34:34.9	6.0397	6.03972	0.0-WT	22	0.901733371	0.703988941	3	1	3 WT
1166	455	29986	9	2	194	0:00:21-0:00:22	22	0	HET	34:34.9	1.64775	1.64775	0.0-HET	22	0.9946023	1.000491	3	0	3 HET
1167	456	30052	9	3	195	0:00:21-0:00:22	22	0	HOM	34:34.9	6.32001	6.32004	0.0-HOM	22	0.6315102	0.697621427	3	1	3 HOM
1168	457	30118	9	4	196	0:00:21-0:00:22	22	0	WT	34:34.9	4.26367	4.26369	0.0-WT	22	1.209239571	0.686007294	3	0	3 WT
1169	459	30250	9	6	198	0:00:21-0:00:22	22	0	HOM	34:34.9	6.08849	6.08852	0.0-HOM	22	2.253341429	0.900267268	3	1	3 HOM
1170	462	30448	9	9	201	0:00:21-0:00:22	22	0.05	HOM	34:34.9	1.4134	1.4134	0.05HOM	22	0.593299	0.576721276	3	0	3 HOM
1171	463	30514	9	10	202	0:00:21-0:00:22	22	0.05	WT	34:34.9	10.2861	10.2861	0.05WT	22	2.293651429	0.738786859	3	1	3 WT
1172	464	30580	9	11	203	0:00:21-0:00:22	22	0.05	HET	34:34.9	6.28399	6.28401	0.05HET	22	2.159125714	1.058595804	3	1	3 HET
1173	465	30646	9	12	204	0:00:21-0:00:22	22	0.05	HOM	34:34.9	8.46422	8.46427	0.05HOM	22	1.454590429	0.94206514	3	1	3 HOM
1174	466	30712	9	13	205	0:00:21-0:00:22	22	0.1	WT	34:34.9	8.9873	8.98733	0.1WT	22	3.192831429	1.29712637	3	1	3 WT
1175	467	30778	9	14	206	0:00:21-0:00:22	22	0.1	HET	34:34.9	7.07041	7.07043	0.1HET	22	0	0	3	1	3 HET
1176	468	30844	9	15	207	0:00:21-0:00:22	22	0.1	HOM	34:34.9	2.25473	2.25473	0.1HOM	22	4.817605714	1.383741508	3	0	3 HOM
1177	470	30976	9	17	209	0:00:21-0:00:22	22	0.1	HET	34:34.9	3.12727	3.12728	0.1HET	22	1.698455429	1.019392371	3	0	3 HET
1178	472	31108	9	19	211	0:00:21-0:00:22	22	0.5	WT	34:34.9	3.30974	3.30975	0.5WT	22	0.168815186	0.211468692	3	0	3 WT
1179	473	31174	9	20	212	0:00:21-0:00:22	22	0.5	HET	34:34.9	5.34755	5.34758	0.5HET	22	1.827406286	1.346898024	3	1	3 HET
1180	474	31240	9	21	213	0:00:21-0:00:22	22	0.5	HOM	34:34.9	5.23691	5.23694	0.5HOM	22	2.0645427	2.61266204	3	1	3 HOM
1181	475	31306	9	22	214	0:00:21-0:00:22	22	0.5	WT	34:34.9	9.37597	9.37601	0.5WT	22	5.686230286	3.112936483	3	1	3 WT
1182	476	31372	9	23	215	0:00:21-0:00:22	22	0.5	HET	34:34.9	0.2613	0.2613	0.5HET	22	0.536598571	0.501509195	3	0	3 HET
1183	480	31636	10	3	219	0:00:21-0:00:22	22	0.5	WT	34:35.1	6.73048	6.73051	0.5WT	22	0	0	3	1	3 WT
1184	481	31702	10	4	220	0:00:21-0:00:22	22	0.5	HOM	34:35.1	4.32082	4.32084	0.5HOM	22	3.36153	1.835384988	3	0	3 HOM
1185	482	31768	10	5	221	0:00:21-0:00:22	22	0.5	HET	34:35.1	2.37935	2.37936	0.5HET	22	0	0	3	0	3 HET
1186	483	31834	10	6	222	0:00:21-0:00:22	22	0.5	WT	34:35.1	0.256717	0.256718	0.5WT	22	0.1996227	0.10616141	3	0	3 WT
1187	484	31900	10	7	223	0:00:21-0:00:22	22	0.1	HOM	34:35.1	5.02678	5.0268	0.1HOM	22	2.784418571	1.202539475	3	1	3 HOM
1188	485	31966	10	8	224	0:00:21-0:00:22	22	0.1	HET	34:35.1	0.231035	0.231036	0.1HET	22	0.131135329	0.031674	3	0	3 HET
1189	486	32032	10	10	226	0:00:21-0:00:22	22	0.1	HOM	34:35.1	0.438062	0.438064	0.1HOM	22	0	0	3	0	3 HOM
1190	487	32098	10	11	227	0:00:21-0:00:22	22	0.1	HET	34:35.1	5.79898	5.799	0.1HET	22	0	0	3	1	3 HET
1191	488	32164	10	12	228	0:00:21-0:00:22	22	0.1	WT	34:35.1	8.75081	8.75085	0.1WT	22	2.160123714	1.322054693	3	1	3 WT
1192	489	32230	10	13	229	0:00:21-0:00:22	22	0.05	HOM	34:35.1	4.38992	4.38994	0.05HOM	22	2.740012857	0.778581437	3	0	3 HOM
1193	490	32296	10	14	230	0:00:21-0:00:22	22	0.05	HET	34:35.1	9.02537	9.0254	0.05HET	22	4.305907143	3.29718663	3	1	3 HET
1194	491	32362	10	15	231	0:00:21-0:00:22	22	0.05	WT	34:35.1	7.56518	7.5652	0.05WT	22	2.277127429	1.18636332	3	1	3 WT
1195	492	32428	10	16	232	0:00:21-0:00:22	22	0.05	HOM	34:35.1	1.80223	1.80224	0.05HOM	22	2.402745286	1.323389434	3	0	3 HOM
1196	493	32494	10	17	233	0:00:21-0:00:22	22	0.05	HET	34:35.1	7.42698	7.42701	0.05HET	22	1.579411714	0.629006572	3	1	3 HET
1197	495	32626	10	19	235	0:00:21-0:00:22	22	0	HOM	34:35.1	1.06282	1.06282	0.0-HOM	22	1.747005429	0.661277608	3	0	3 HOM
1198	497	32758	10	21	237	0:00:21-0:00:22	22	0	WT	34:35.1	5.31102	5.31104	0.0-WT	22	0	0	3	1	3 WT
1199	500	32956	10	24	240	0:00:21-0:00:22	22	0	WT	34:35.1	6.02257	6.02259	0.0-WT	22	2.017896	1.008769424	3	1	3 WT
1200	501	33022	11	1	241	0:00:21-0:00:22	22	0.05	HET	34:36.1	4.71075	4.71078	0.05HET	22	2.491906143	1.034833251	3	1	3 HET
1201	503	33154	11	4	244	0:00:21-0:00:22	22	0.05	HET	34:36.1	1.95749	1.9575	0.05HET	22	1.982193286	1.045205284	3	0	3 HET
1202	504	33220	11	5	245	0:00:21-0:00:22	22	0.05	HOM	34:36.1	5.91433	5.91436	0.05HOM	22	1.484302429	2.007354846	3	1	3 HOM
1203	505	33286	11	6	246	0:00:21-0:00:22	22	0.05	WT	34:36.1	5.57078	5.5708	0.05WT	22	2.205965857	1.121184338	3	1	3 WT
1204	506	33352	11	7	247	0:00:21-0:00:22	22	0	HET	34:36.1	2.03802	2.03803	0.0-HET	22	2.369891429	1.138230861	3	0	3 HET
1205	507	33418	11	8	248	0:00:21-0:00:22	22	0	HOM	34:36.1	6.6346	6.63462	0.0-HOM	22	3.690508571	2.043959196	3	1	3 HOM
1206	508	33484	11	9	249	0:00:21-0:00:22	22	0	WT	34:36.1	6.21163	6.21165	0.0-WT	22	1.711349857	1.059908005	3	1	3 WT
1207	509	33550	11	10	250	0:00:21-0:00:22	22	0	HET	34:36.1	6.46979	6.46982	0.0-HET	22	4.148462857	1.438116923	3	1	3 HET
1208	511	33682	11	12	252	0:00:21-0:00:22	22	0	WT	34:36.1	2.8429	2.84292	0.0-WT	22	1.837219714	1.308639091	3	0	3 WT
1209	512	33748	11	13	253	0:00:21-0:00:22	22	0.5	HET	34:36.1	6.95781	6.95784	0.5HET	22	3.386813143	1.874428883	3	1	3 HET
1210	513	33814	11	14	254	0:00:21-0:00:22	22	0.5	HOM	34:36.1	9.84555	9.84559	0.5HOM	22	0.644066	0.513031796	3	1	3 HOM
1211	514	33880	11	15	255	0:00:21-0:00:22	22	0.5	WT	34:36.1	5.59992	5.59994	0.5WT	22	2.784156857	2.41940726	3	1	3 WT
1212	515	33946	11	16	256	0:00:21-0:00:22	22	0.5	HET	34:36.1	3.79226	3.79228	0.5HET	22	1.239999	0.577484894	3	0	3 HET
1213	516	34012	11	17	257	0:00:21-0:00:22	22	0.5	HOM	34:36.1	1.40604	1.40605	0.5HOM	22	1.450888286	1.230211559	3	0	3 HOM
1214	517	34078	11	18	258	0:00:21-0:00:22	22	0.5	WT	34:36.1	5.42314	5.42315	0.5WT	22	2.93749	1.678779889	3	1	3 WT
1215	518	34144	11	19	259	0:00:21-0:00:22	22	0.1	HET	34:36.1	8.68418	8.68421	0.1HET	22	1.216238714	1.325158606	3	1	3 HET
1216	519	34210	11	20	260	0:00:21-0:00:22	22	0.1	HOM	34:36.1	3.0388	3.03882	0.1HOM	22	2.862536	1.660111318	3	0	3 HOM
1217	520	34276	11	21	261	0:00:21-0:00:22	22	0.1	WT	34:36.1	0.760641	0.760644	0.1WT	22	1.903320714	1.223215164	3	0	3 WT
1218	521	34342	11	22	262	0:00:21-0:00:22	22	0.1	HET	34:36.1	9.7608	9.76083	0.1HET	22	1.370316286	1.340278038	3	1	3 HET
1219	522	34408	11	23	263	0:00:21-0:00:22	22	0.1	HOM	34:36.1	3.74558	3.7456	0.1HOM	22	3.991257143	1.440579495	3	0	3 HOM
1220	524	34540	12	1	265	0:00:21-0:00:22	22	0.1	HOM		5.60218	5.6022	0.1HOM	22	1.566954857	1.572503193	3	1	3 HOM
1221	525	34606	12	2	266	0:00:21-0:00:22	22	0.1	WT		0.778663	0.778667	0.1WT	22	1.073512	0.517390917	3	0	3 WT
1222	526	34672	12	3	267	0:00:21-0:00:22	22	0.1	HET		3.55457	3.55458	0.1HET	22	2.683635714	1.455323755	3	0	3 HET
1223	527	34738	12	4	268	0:00:21-0:00:22	22	0.1	HOM		3.60188	3.6019	0.1HOM	22	2.575920271	1.999325806	3	0	3 HOM
1224	528	34804	12	5	269	0:00:21-0:00:22	22	0.1	WT		0.0533283	0.0533285	0.1WT	22	0.7041768	0.934000903	3	0	3 WT
1225	529	34870	12	6	270	0:00:21-0:00:22	22	0.1	HET		4.00309	4.00311	0.1HET	22	0.165453143	0.057074345	3	0	3 HET
1226	530	34936	12	7	271	0:00:21-0:00:22	22	0.05	HOM		2.14562	2.14562	0.05HOM	22	3.352947143	1.230207625	3	0	3 HOM
1227	534	35200	12	11	275	0:00:21-0:00:22	22	0.05	WT		2.22259	2.22259	0.05WT	22	0.101265329	0.093683752	3	0	3 WT
1228	536	35332	12	13	277	0:00:21-0:00:22	22	0	HOM		5.46999	5.47001	0.0-HOM	22	2.190753714	1.252251081	3	1	3 HOM
1229	538	35464	12	15	279	0:00:21-0:00:22	22	0	HET		3.53104	3.53106	0.0-HET	22	2.899242857	1.146707061	3	0	3 HET
1230	539	35530	12	16	280	0:00:21-0:00:22	22	0	HOM		5.1679	5.16792	0.0-HOM	22	0	0	3	1	3 HOM
1231	540	35596	12	18	282	0:00:21-0:00:22	22	0	HET		0	-	0.0-HET	22	0	0	3	0	3 HET
1232	541	35662	12	19	283	0:00:21-0:00:22	22	0.5	HOM		3.11624	3.11625	0.5HOM	22	0.772220429	0.986281066	3	0	3 HOM
1233	543	35794	12	21	285	0:00:21-0:00:22	22	0.5	HET		0.242988	0.242989	0.5HET	22	0.968227486	1.379589195	3	0	3 HET
1234	544	35860	12	22	286	0:00:21-0:00:22	22	0.5	HOM		5.23365	5.23367	0.5HOM	22	1.267766571	0.899674818	3	1	3 HOM
1235	545	35926	12	23	287	0:00:21-0:00:22	22	0.5	WT		5.58642	5.58644	0.5WT	22	4.199212857	1.129832637	3	1	3 WT
1236	546	35992	12	24	288	0:00:21-0:00:22	22	0.5	HET		1.73584	7.43935	0.5HET	22	0.240444286	0.194609688	3	0	3 HET
1237	1	25	1	1	1	0:00:24-0:00:25	25	0	WT	12:49.0	0.499436	0.499438	0.0-WT	25	1.180561286	1.135888549	4	0	4 WT
1238	2	91	1	2	2	0:00:24-0:00:25	25	0	HET	12:49.0	4.33467	4.33469	0.0-HET	25	2.011318286	0.970482169	4	0	4 HET
1239	3	157	1	3	3	0:00:24-0:00:25	25	0	HOM	12:49.0	5.66197	5.662	0.0-HOM	25	2.889595714	0.904587765	4	1	4 HOM
1240	4	223	1	4	4	0:00:24-0:00:25	25	0	WT	12:49.0	5.73808	5.7381	0.0-WT	25	2.368274	1.168113455	4	1	4 WT
1241	5	289	1	6	6	0:00:24-0:00:25	25	0	HOM	12:49.0	0.76577	0.765773	0.0-HOM	25	0.013573627	0.035871086	4	0	4 HOM
1242	7	421	1	8	8	0:00:24-0:00:25	25	0.05	HET	12:49.0	0.176657	0.176658	0.05HET	25	0.647693429	0.44453187	4	0	4 HET
1243	8	487	1	9	9	0:00:24-0:00:25	25	0.05	HOM	12:49.0	10.5234	10.5234	0.05HOM	25	5.395067143	1.408212512	4	1	4 HOM
1244	9	553	1	10	10	0:00:24-0:00:25	25	0.05	WT	12:49.0	5.00119	5.00121	0.05WT	25	2.577101429	1.153030511	4	1	4 WT
1245	10	619	1	11	11	0:00:24-0:00:25	25	0.05	HET	12:49.0	3.93959	3.9396	0.05HET	25	2.877030143	2.307565872	4	0	4 HET
1246	11	685	1	12	12	0:00:24-0:00:25	25	0.05	HOM	12:49.0	5.45447	5.45449	0.05HOM	25	1.740242286	0.652992436	4	1	4 HOM
1247	12	751	1	13	13	0:00:24-0:00:25	25	0.1	WT	12:49.0	7.91467	7.9147	0.1WT	25	2.032282429	1.084776067	4	1	4 WT
1248	13	817	1	14	14	0:00:24-0:00:25	25	0.1	HET	12:49.0	3.30527	3.30529	0.1HET	25	2.210420857	0.995603805	4	0	4 HET
1249	14	883	1	15	15	0:00:24-0:00:25	25	0.1	HOM	12:49.0	3.46818	3.46819	0.1HOM	25	1.667926914	1.106488132	4	0	4 HOM
1250	15	949	1	16	16	0:00:24-0:00:25	25	0.1	WT	12:49.0	0.903892	0.903896	0.1WT	25	0.381698357	0.470994943	4	0	4 WT
1251	16	1015	1	17	17	0:00:24-0:00:25	25	0.1	HET	12:49.0	1.40778	1.40779	0.1HET	25	1.353618571	0.737939176	4	0	4 HET
1252	17	1081	1	18	18	0:00:24-0:00:25	25	0.1	HOM	12:49.0	1.00789	1.0079	0.1HOM	25	0.914573143	0.657132531	4	0	4 HOM
1253	18	1147	1	19	19	0:00:24-0:00:25	25	0.5	WT	12:49.0	5.42191	5.42194	0.5WT	25	1.497794143	0.873332404	4	1	4 WT
1254	19	1213	1	20	20	0:00:24-0:00:25	25	0.5	HET	12:49.0	0.286261	0.286262	0.5HET	25	0.208540143	0.04954608	4	0	4 HET
1255	20	1279	1	21	21	0:00:24-0:00:25	25	0.5	HOM	12:49.0	0.33167	0.331671	0.5HOM	25	0.297336857	0.315797242	4	0	4 HOM
1256	21	1345	1	22	22	0:00:24-0:00:25	25	0.5	WT	12:49.0	3.15468	3.15469	0.5WT	25	1.779207571	1.952981837	4	0	4 WT
1257	22	1411	1	23	23	0:00:24-0:00:25	25	0.5	HET	12:49.0	4.09275	4.09277	0.5HET	25	2.606451429	1.22774317	4	0	4 HET
1258	23	1477	1	24	24	0:00:24-0:00:25	25	0.5	HOM	12:49.0	0.293641	0.293641	0.5HOM	25	0.349793143	0.123948779	4	0	4 HOM
1259	24	1543	2	1	25	0:00:24-0:00:25	25	0.5	HOM	12:51.0	4.51146	4.51148	0.5HOM	25	1.437309	1.019745158	4	0	4 HOM
1260	25	1609	2	2	26	0:00:24-0:00:25	25	0.5	HET	12:51.0	7.93345	7.93349	0.5HET	25	1.794850429	1.162152569	4	1	4 HET
1261	28	1807	2	5	29	0:00:24-0:00:25	25	0.5	HET	12:51.0	0.138136	0.138136	0.5HET	25	2.3201377	2.988938233	4	0	4 HET
1262	29	1873	2	6	30	0:00:24-0:00:25	25	0.5	WT	12:51.0	6.3886	6.38863	0.5WT	25	1.042406286	1.605198035	4	1	4 WT
1263	30	1939	2	7	31	0:00:24-0:00:25	25	0.1	HOM	12:51.0	2.96924	2.96926	0.1HOM	25	1.173173714	0.403128626	4	0	4 HOM
1264	31	2005	2	8	32	0:00:24-0:00:25	25	0.1	HET	12:51.0	8.70367	8.70371	0.1HET	25	3.233362857	1.347631451	4	1	4 HET
1265	32	2071	2	9	33	0:00:24-0:00:25	25	0.1	WT	12:51.0	0.946449	0.946456	0.1WT	25	1.721631	1.617305806	4	0	4 WT
1266	33	2137	2	10	34	0:00:24-0:00:25	25	0.1	HOM	12:51.0	6.9307	6.93073	0.1HOM	25	2.229919857	1.023574587	4	1	4 HOM
1267	34	2203	2	11	35	0:00:24-0:00:25	25	0.1	HET	12:51.0	0.0444565	0.0444569	0.1HET	25	0.300534571	0.066941886	4	0	4 HET
1268	35	2269	2	12	36	0:00:24-0:00:25	25	0.1	WT	12:51.0	5.07007	5.07009	0.1WT	25	1.923331571	1.26464084	4	1	4 WT
1269	37	2401	2	14	38	0:00:24-0:00:25	25	0.05	HET	12:51.0	9.47892	9.47896	0.05HET	25	2.290424429	1.351957642	4	1	4 HET
1270	39	2533	2	16	40	0:00:24-0:00:25	25	0.05	HOM	12:51.0	1.95948	1.95948	0.05HOM	25	3.029794286	1.322979054	4	0	4 HOM
1271	40	2599	2	17	41	0:00:24-0:00:25	25	0.05	HET	12:51.0	5.64542	5.64544	0.05HET	25	2.539301429	0.756876461	4	1	4 HET
1272	41	2665	2	18	42	0:00:24-0:00:25	25	0.05	WT	12:51.0	3.6534	3.65341	0.05WT	25	3.043902857	2.094220958	4	0	4 WT
1273	42	2731	2	19	43	0:00:24-0:00:25	25	0	HOM	12:51.0	1.50051	1.50052	0.0-HOM	25	0.703719	1.693157901	4	0	4 HOM
1274	44	2863	2	21	45	0:00:24-0:00:25	25	0	WT	12:51.0	7.87502	7.87505	0.0-WT	25	0.2453313	0.130157665	4	1	4 WT
1275	45	2929	2	22	46	0:00:24-0:00:25	25	0	HOM	12:51.0	0.170123	0.170124	0.0-HOM	25	4.174741429	2.660700231	4	0	4 HOM
1276	46	2995	2	23	47	0:00:24-0:00:25	25	0	HET	12:51.0	8.94937	8.94942	0.0-HET	25	0.044198253	0.05314635	4	1	4 HET
1277	47	3061	2	24	48	0:00:24-0:00:25	25	0	WT	12:51.0	3.72515	3.72517	0.0-WT	25	1.371783857	0.542303383	4	0	4 WT
1278	48	3127	3	2	50	0:00:24-0:00:25	25	0.05	HOM	12:53.0	8.31304	8.31308	0.05HOM	25	4.12366	1.869821986	4	1	4 HOM
1279	49	3193	3	3	51	0:00:24-0:00:25	25	0.05	WT	12:53.0	4.64225	4.64227	0.05WT	25	1.020839714	0.57873795	4	1	4 WT
1280	52	3391	3	6	54	0:00:24-0:00:25	25	0.05	WT	12:53.0	3.86045	3.86047	0.05WT	25	1.159357	0.385291578	4	0	4 WT
1281	54	3523	3	8	56	0:00:24-0:00:25	25	0	HOM	12:53.0	7.48476	7.48479	0.0-HOM	25	3.553782857	1.049053809	4	1	4 HOM
1282	55	3589	3	9	57	0:00:24-0:00:25	25	0	WT	12:53.0	6.17754	6.17757	0.0-WT	25	1.986372	1.224975965	4	1	4 WT
1283	56	3655	3	10	58	0:00:24-0:00:25	25	0	HET	12:53.0	3.11776	3.11777	0.0-HET	25	0.720728714	1.027707677	4	0	4 HET
1284	57	3721	3	11	59	0:00:24-0:00:25	25	0	HOM	12:53.0	3.37041	3.37042	0.0-HOM	25	1.423637	0.765596929	4	0	4 HOM
1285	58	3787	3	12	60	0:00:24-0:00:25	25	0	WT	12:53.0	0.268723	0.268724	0.0-WT	25	0.740175714	1.055826303	4	0	4 WT
1286	59	3853	3	13	61	0:00:24-0:00:25	25	0.5	HET	12:53.0	5.54165	5.54167	0.5HET	25	0.641043714	0.261813274	4	1	4 HET
1287	60	3919	3	14	62	0:00:24-0:00:25	25	0.5	HOM	12:53.0	2.85449	2.8545	0.5HOM	25	2.810754286	1.239577453	4	0	4 HOM
1288	61	3985	3	15	63	0:00:24-0:00:25	25	0.5	WT	12:53.0	7.06012	7.06015	0.5WT	25	2.64463	1.196078924	4	1	4 WT
1289	62	4051	3	16	64	0:00:24-0:00:25	25	0.5	HET	12:53.0	5.67508	5.6751	0.5HET	25	0.471522143	0.308495034	4	1	4 HET
1290	63	4117	3	17	65	0:00:24-0:00:25	25	0.5	HOM	12:53.0	8.68548	8.68551	0.5HOM	25	2.187195857	1.331574952	4	1	4 HOM
1291	64	4183	3	18	66	0:00:24-0:00:25	25	0.5	WT	12:53.0	1.43613	1.43613	0.5WT	25	2.303509286	0.891623508	4	0	4 WT
1292	65	4249	3	19	67	0:00:24-0:00:25	25	0.1	HET	12:53.0	4.45517	4.45518	0.1HET	25	1.151475286	0.751492317	4	0	4 HET
1293	66	4315	3	20	68	0:00:24-0:00:25	25	0.1	HOM	12:53.0	3.91683	3.91685	0.1HOM	25	2.768492857	1.01899573	4	0	4 HOM
1294	67	4381	3	21	69	0:00:24-0:00:25	25	0.1	WT	12:53.0	3.22347	3.22348	0.1WT	25	1.072808029	0.562184755	4	0	4 WT
1295	68	4447	3	22	70	0:00:24-0:00:25	25	0.1	HET	12:53.0	8.91056	8.91059	0.1HET	25	0.227902286	0.060786418	4	1	4 HET
1296	69	4513	3	23	71	0:00:24-0:00:25	25	0.1	HOM	12:53.0	7.06343	7.06345	0.1HOM	25	3.34447	0.908484292	4	1	4 HOM
1297	70	4579	3	24	72	0:00:24-0:00:25	25	0.1	WT	12:53.0	7.28742	7.28746	0.1WT	25	7.063839571	7.201228625	4	1	4 WT
1298	71	4645	4	1	73	0:00:24-0:00:25	25	0.1	HOM	12:54.0	4.09035	4.09037	0.1HOM	25	1.239805286	0.81827793	4	0	4 HOM
1299	72	4711	4	2	74	0:00:24-0:00:25	25	0.1	WT	12:54.0	0.636183	0.636185	0.1WT	25	2.987192857	0.904824624	4	0	4 WT
1300	74	4843	4	4	76	0:00:24-0:00:25	25	0.1	HOM	12:54.0	3.5154	3.51541	0.1HOM	25	3.209058571	1.269733628	4	0	4 HOM
1301	76	4975	4	6	78	0:00:24-0:00:25	25	0.1	HET	12:54.0	5.43882	5.43884	0.1HET	25	0	0	4	1	4 HET
1302	77	5041	4	7	79	0:00:24-0:00:25	25	0.05	HOM	12:54.0	6.95404	6.95407	0.05HOM	25	2.538768	1.595403351	4	1	4 HOM
1303	79	5173	4	9	81	0:00:24-0:00:25	25	0.05	HET	12:54.0	5.20163	5.20165	0.05HET	25	3.135845286	2.892266421	4	1	4 HET
1304	80	5239	4	10	82	0:00:24-0:00:25	25	0.05	HOM	12:54.0	6.55977	6.55979	0.05HOM	25	0.240877429	0.057594612	4	1	4 HOM
1305	81	5305	4	11	83	0:00:24-0:00:25	25	0.05	WT	12:54.0	4.20088	4.2009	0.05WT	25	2.194106143	2.230141278	4	0	4 WT
1306	83	5437	4	13	85	0:00:24-0:00:25	25	0	HOM	12:54.0	0.310904	0.310906	0.0-HOM	25	2.564042	1.406434787	4	0	4 HOM
1307	84	5503	4	14	86	0:00:24-0:00:25	25	0	WT	12:54.0	6.95762	6.95765	0.0-WT	25	1.277219143	0.967451176	4	1	4 WT
1308	86	5635	4	16	88	0:00:24-0:00:25	25	0	HOM	12:54.0	4.66383	4.66385	0.0-HOM	25	1.896747857	0.870392183	4	1	4 HOM
1309	87	5701	4	17	89	0:00:24-0:00:25	25	0	WT	12:54.0	2.70085	2.70086	0.0-WT	25	2.189688571	0.744186359	4	0	4 WT
1310	88	5767	4	18	90	0:00:24-0:00:25	25	0	HET	12:54.0	6.47678	6.47681	0.0-HET	25	2.721048571	1.249914543	4	1	4 HET
1311	89	5833	4	19	91	0:00:24-0:00:25	25	0.5	HOM	12:54.0	2.72503	2.72504	0.5HOM	25	4.468614286	1.607349606	4	0	4 HOM
1312	90	5899	4	20	92	0:00:24-0:00:25	25	0.5	WT	12:54.0	5.69571	5.69574	0.5WT	25	1.322670429	0.693460368	4	1	4 WT
1313	91	5965	4	21	93	0:00:24-0:00:25	25	0.5	HET	12:54.0	9.85607	9.85611	0.5HET	25	1.736251	0.736099733	4	1	4 HET
1314	92	6031	4	22	94	0:00:24-0:00:25	25	0.5	HOM	12:54.0	0.251624	0.251625	0.5HOM	25	1.891154	1.162973448	4	0	4 HOM
1315	93	6097	4	23	95	0:00:24-0:00:25	25	0.5	WT	12:54.0	3.59582	3.59584	0.5WT	25	1.593217571	1.635678836	4	0	4 WT
1316	94	6163	5	1	97	0:00:24-0:00:25	25	0	WT	12:56.0	4.49101	4.49102	0.0-WT	25	1.716623857	0.652471014	4	0	4 WT
1317	96	6295	5	3	99	0:00:24-0:00:25	25	0	HOM	12:56.0	3.09612	3.09613	0.0-HOM	25	3.645612857	1.155423266	4	0	4 HOM
1318	97	6361	5	4	100	0:00:24-0:00:25	25	0	WT	12:56.0	4.50633	4.50635	0.0-WT	25	2.620526857	2.176612002	4	0	4 WT
1319	98	6427	5	5	101	0:00:24-0:00:25	25	0	HET	12:56.0	4.25705	4.25707	0.0-HET	25	2.833251429	1.011953987	4	0	4 HET
1320	99	6493	5	6	102	0:00:24-0:00:25	25	0	HOM	12:56.0	4.37969	4.37971	0.0-HOM	25	1.614774571	0.634151218	4	0	4 HOM
1321	100	6559	5	7	103	0:00:24-0:00:25	25	0.05	WT	12:56.0	5.67068	5.6707	0.05WT	25	1.468153	1.278960247	4	1	4 WT
1322	101	6625	5	8	104	0:00:24-0:00:25	25	0.05	HET	12:56.0	4.8922	4.89222	0.05HET	25	2.773088571	0.84732286	4	1	4 HET
1323	102	6691	5	9	105	0:00:24-0:00:25	25	0.05	HOM	12:56.0	0.82274	0.822743	0.05HOM	25	0.521379143	0.04503448	4	0	4 HOM
1324	103	6757	5	10	106	0:00:24-0:00:25	25	0.05	WT	12:56.0	2.76785	2.76786	0.05WT	25	1.632159	1.227781197	4	0	4 WT
1325	104	6823	5	11	107	0:00:24-0:00:25	25	0.05	HET	12:56.0	3.86527	3.86529	0.05HET	25	1.499028857	0.825314053	4	0	4 HET
1326	105	6889	5	12	108	0:00:24-0:00:25	25	0.05	HOM	12:56.0	1.59964	1.59965	0.05HOM	25	2.040175429	1.276707416	4	0	4 HOM
1327	106	6955	5	13	109	0:00:24-0:00:25	25	0.1	WT	12:56.0	7.30551	7.30554	0.1WT	25	0.516920286	0.803320354	4	1	4 WT
1328	107	7021	5	14	110	0:00:24-0:00:25	25	0.1	HET	12:56.0	1.5776	1.5776	0.1HET	25	2.105871429	0.678338778	4	0	4 HET
1329	109	7153	5	16	112	0:00:24-0:00:25	25	0.1	WT	12:56.0	4.8193	4.81932	0.1WT	25	1.610134143	0.640268018	4	1	4 WT
1330	110	7219	5	17	113	0:00:24-0:00:25	25	0.1	HET	12:56.0	2.60208	2.60209	0.1HET	25	2.140899857	1.165151366	4	0	4 HET
1331	111	7285	5	18	114	0:00:24-0:00:25	25	0.1	HOM	12:56.0	0.882334	0.882337	0.1HOM	25	0.853213329	1.085359375	4	0	4 HOM
1332	112	7351	5	19	115	0:00:24-0:00:25	25	0.5	WT	12:56.0	1.77044	1.77045	0.5WT	25	1.074989857	0.83624439	4	0	4 WT
1333	113	7417	5	20	116	0:00:24-0:00:25	25	0.5	HET	12:56.0	0.34977	0.349772	0.5HET	25	1.219901143	1.093669556	4	0	4 HET
1334	114	7483	5	21	117	0:00:24-0:00:25	25	0.5	HOM	12:56.0	6.70032	6.70035	0.5HOM	25	2.332858857	1.804969231	4	1	4 HOM
1335	115	7549	5	22	118	0:00:24-0:00:25	25	0.5	WT	12:56.0	1.43385	1.43385	0.5WT	25	1.255830857	0.712211479	4	0	4 WT
1336	116	7615	5	23	119	0:00:24-0:00:25	25	0.5	HET	12:56.0	4.50638	4.5064	0.5HET	25	1.853874143	0.699755011	4	0	4 HET
1337	117	7681	5	24	120	0:00:24-0:00:25	25	0.5	HOM	12:56.0	4.30548	4.3055	0.5HOM	25	2.094971714	1.095230673	4	0	4 HOM
1338	119	7813	6	2	122	0:00:24-0:00:25	25	0.5	HET	12:57.0	0.707043	0.707046	0.5HET	25	2.626486429	1.298223294	4	0	4 HET
1339	120	7879	6	3	123	0:00:24-0:00:25	25	0.5	WT	12:57.0	3.5314	3.53142	0.5WT	25	2.567537143	1.160752961	4	0	4 WT
1340	121	7945	6	4	124	0:00:24-0:00:25	25	0.5	HOM	12:57.0	0.243884	0.243886	0.5HOM	25	0.112247029	0.051276989	4	0	4 HOM
1341	122	8011	6	5	125	0:00:24-0:00:25	25	0.5	HET	12:57.0	7.31615	7.31616	0.5HET	25	0.785613857	0.698682185	4	1	4 HET
1342	123	8077	6	6	126	0:00:24-0:00:25	25	0.5	WT	12:57.0	0.187722	0.187723	0.5WT	25	2.401295143	1.220302752	4	0	4 WT
1343	125	8209	6	8	128	0:00:24-0:00:25	25	0.1	HET	12:57.0	2.43027	2.43028	0.1HET	25	1.948756857	1.208198692	4	0	4 HET
1344	126	8275	6	9	129	0:00:24-0:00:25	25	0.1	WT	12:57.0	2.0178	2.0178	0.1WT	25	0.889315614	0.999745766	4	0	4 WT
1345	127	8341	6	10	130	0:00:24-0:00:25	25	0.1	HOM	12:57.0	0.449027	0.449029	0.1HOM	25	0	0	4	0	4 HOM
1346	128	8407	6	11	131	0:00:24-0:00:25	25	0.1	HET	12:57.0	2.33184	2.33185	0.1HET	25	1.860198429	1.773097568	4	0	4 HET
1347	129	8473	6	12	132	0:00:24-0:00:25	25	0.1	WT	12:57.0	0.374651	0.374653	0.1WT	25	2.448341143	1.392994021	4	0	4 WT
1348	130	8539	6	13	133	0:00:24-0:00:25	25	0.05	HOM	12:57.0	1.06953	1.06954	0.05HOM	25	2.905667429	2.234423083	4	0	4 HOM
1349	131	8605	6	14	134	0:00:24-0:00:25	25	0.05	HET	12:57.0	1.28984	1.28985	0.05HET	25	1.656211857	0.83480597	4	0	4 HET
1350	132	8671	6	15	135	0:00:24-0:00:25	25	0.05	WT	12:57.0	0.70414	0.704144	0.05WT	25	1.138593143	0.722972032	4	0	4 WT
1351	133	8737	6	16	136	0:00:24-0:00:25	25	0.05	HOM	12:57.0	7.3816	7.38163	0.05HOM	25	3.539044286	1.725730185	4	1	4 HOM
1352	134	8803	6	17	137	0:00:24-0:00:25	25	0.05	HET	12:57.0	4.71308	4.7131	0.05HET	25	1.554092	1.688855217	4	1	4 HET
1353	135	8869	6	18	138	0:00:24-0:00:25	25	0.05	WT	12:57.0	4.10166	4.10167	0.05WT	25	0.647834571	0.475049033	4	0	4 WT
1354	137	9001	6	20	140	0:00:24-0:00:25	25	0	HET	12:57.0	4.77759	4.77761	0.0-HET	25	1.231204429	0.633436139	4	1	4 HET
1355	139	9133	6	22	142	0:00:24-0:00:25	25	0	HOM	12:57.0	0.200991	0.200992	0.0-HOM	25	0.207687757	0.114345154	4	0	4 HOM
1356	140	9199	6	23	143	0:00:24-0:00:25	25	0	HET	12:57.0	0.251162	0.251164	0.0-HET	25	0.375648571	0.323850098	4	0	4 HET
1357	141	9265	7	1	145	0:00:24-0:00:25	25	0.05	HET	12:58.0	4.99436	4.99438	0.05HET	25	2.978892857	1.929675987	4	1	4 HET
1358	144	9463	7	4	148	0:00:24-0:00:25	25	0.05	HET	12:58.0	0.0309253	0.0309255	0.05HET	25	0	0	4	0	4 HET
1359	145	9529	7	5	149	0:00:24-0:00:25	25	0.05	HOM	12:58.0	3.8954	3.89541	0.05HOM	25	3.878628571	1.449574306	4	0	4 HOM
1360	146	9595	7	6	150	0:00:24-0:00:25	25	0.05	WT	12:58.0	1.27566	1.27567	0.05WT	25	2.184584286	0.975753038	4	0	4 WT
1361	149	9793	7	10	154	0:00:24-0:00:25	25	0	HET	12:58.0	5.30102	5.30104	0.0-HET	25	0.285575571	0.431816887	4	1	4 HET
1362	150	9859	7	14	158	0:00:24-0:00:25	25	0.5	HOM	12:58.0	4.04822	4.04824	0.5HOM	25	2.723723571	1.210933561	4	0	4 HOM
1363	151	9925	7	15	159	0:00:24-0:00:25	25	0.5	WT	12:58.0	6.25943	6.25946	0.5WT	25	1.880752	1.51448201	4	1	4 WT
1364	152	9991	7	16	160	0:00:24-0:00:25	25	0.5	HET	12:58.0	6.497	6.49702	0.5HET	25	2.221199	1.880551301	4	1	4 HET
1365	153	10057	7	17	161	0:00:24-0:00:25	25	0.5	HOM	12:58.0	6.07146	6.07149	0.5HOM	25	4.51535	1.332800125	4	1	4 HOM
1366	156	10255	7	20	164	0:00:24-0:00:25	25	0.1	HOM	12:58.0	10.6937	10.6938	0.1HOM	25	3.903469857	4.587065004	4	1	4 HOM
1367	157	10321	7	21	165	0:00:24-0:00:25	25	0.1	WT	12:58.0	0.930623	0.930631	0.1WT	25	2.886608714	2.935351973	4	0	4 WT
1368	158	10387	7	22	166	0:00:24-0:00:25	25	0.1	HET	12:58.0	8.19023	8.19026	0.1HET	25	1.800143286	2.223983673	4	1	4 HET
1369	159	10453	7	23	167	0:00:24-0:00:25	25	0.1	HOM	12:58.0	7.36763	7.36766	0.1HOM	25	1.021409429	1.071840721	4	1	4 HOM
1370	160	10519	8	1	169	0:00:24-0:00:25	25	0.1	HOM	12:59.0	8.18711	8.18714	0.1HOM	25	1.593846714	0.846523033	4	1	4 HOM
1371	161	10585	8	2	170	0:00:24-0:00:25	25	0.1	WT	12:59.0	5.93964	5.93967	0.1WT	25	0.109340143	0.289286826	4	1	4 WT
1372	162	10651	8	3	171	0:00:24-0:00:25	25	0.1	HET	12:59.0	6.3989	6.39893	0.1HET	25	0.650460286	0.761144844	4	1	4 HET
1373	163	10717	8	4	172	0:00:24-0:00:25	25	0.1	HOM	12:59.0	9.31117	9.3112	0.1HOM	25	2.855192714	1.342471596	4	1	4 HOM
1374	165	10849	8	6	174	0:00:24-0:00:25	25	0.1	HET	12:59.0	0.0412928	0.0412931	0.1HET	25	0.949679357	0.80002752	4	0	4 HET
1375	166	10915	8	7	175	0:00:24-0:00:25	25	0.05	HOM	12:59.0	1.21574	1.21574	0.05HOM	25	0.897638971	0.799453368	4	0	4 HOM
1376	167	10981	8	8	176	0:00:24-0:00:25	25	0.05	WT	12:59.0	5.64766	5.64769	0.05WT	25	2.116546286	1.467558586	4	1	4 WT
1377	168	11047	8	9	177	0:00:24-0:00:25	25	0.05	HET	12:59.0	3.48829	3.4883	0.05HET	25	0.316620429	0.223434385	4	0	4 HET
1378	169	11113	8	10	178	0:00:24-0:00:25	25	0.05	HOM	12:59.0	3.31973	3.31975	0.05HOM	25	1.503959286	1.005175263	4	0	4 HOM
1379	170	11179	8	11	179	0:00:24-0:00:25	25	0.05	WT	12:59.0	5.30363	5.30365	0.05WT	25	2.57616	1.577066033	4	1	4 WT
1380	171	11245	8	12	180	0:00:24-0:00:25	25	0.05	HET	12:59.0	7.08895	7.08898	0.05HET	25	1.980208571	0.743320723	4	1	4 HET
1381	172	11311	8	13	181	0:00:24-0:00:25	25	0	HOM	12:59.0	3.60191	3.60192	0.0-HOM	25	3.778705714	1.633009605	4	0	4 HOM
1382	173	11377	8	14	182	0:00:24-0:00:25	25	0	WT	12:59.0	1.7835	1.78351	0.0-WT	25	1.225098857	0.944735915	4	0	4 WT
1383	174	11443	8	15	183	0:00:24-0:00:25	25	0	HET	12:59.0	1.25318	1.25318	0.0-HET	25	2.904332286	2.629738354	4	0	4 HET
1384	175	11509	8	16	184	0:00:24-0:00:25	25	0	HOM	12:59.0	5.30008	5.30011	0.0-HOM	25	2.340171429	1.221215019	4	1	4 HOM
1385	176	11575	8	17	185	0:00:24-0:00:25	25	0	WT	12:59.0	8.11197	8.112	0.0-WT	25	1.336164	0.994194907	4	1	4 WT
1386	177	11641	8	19	187	0:00:24-0:00:25	25	0.5	HOM	12:59.0	0.42002	0.420021	0.5HOM	25	0	0	4	0	4 HOM
1387	178	11707	8	20	188	0:00:24-0:00:25	25	0.5	WT	12:59.0	4.96778	4.9678	0.5WT	25	2.919832857	0.713807585	4	1	4 WT
1388	179	11773	8	21	189	0:00:24-0:00:25	25	0.5	HET	12:59.0	0.191282	0.191282	0.5HET	25	0.132793171	0.023910874	4	0	4 HET
1389	181	11905	8	23	191	0:00:24-0:00:25	25	0.5	WT	12:59.0	2.82419	2.8242	0.5WT	25	2.243468714	2.029499897	4	0	4 WT
1390	182	11971	8	24	192	0:00:24-0:00:25	25	0.5	HET	12:59.0	0.236936	0.236937	0.5HET	25	0.127662129	0.067692967	4	0	4 HET
1391	186	12235	9	4	196	0:00:24-0:00:25	25	0	WT	13:00.0	0.131219	0.131219	0.0-WT	25	0.955870286	0.773719706	4	0	4 WT
1392	187	12301	9	5	197	0:00:24-0:00:25	25	0	HET	13:00.0	3.4841	3.48411	0.0-HET	25	1.379209714	0.955976944	4	0	4 HET
1393	188	12367	9	6	198	0:00:24-0:00:25	25	0	HOM	13:00.0	4.45566	4.45567	0.0-HOM	25	0.175336	0.256626328	4	0	4 HOM
1394	189	12433	9	7	199	0:00:24-0:00:25	25	0.05	WT	13:00.0	2.82031	2.82032	0.05WT	25	2.667998571	1.064283782	4	0	4 WT
1395	190	12499	9	8	200	0:00:24-0:00:25	25	0.05	HET	13:00.0	6.62404	6.62407	0.05HET	25	1.921692714	1.718362006	4	1	4 HET
1396	191	12565	9	10	202	0:00:24-0:00:25	25	0.05	WT	13:00.0	5.98598	5.98601	0.05WT	25	3.557647143	1.465747329	4	1	4 WT
1397	192	12631	9	11	203	0:00:24-0:00:25	25	0.05	HET	13:00.0	9.32287	9.32291	0.05HET	25	0.203747286	0.063253295	4	1	4 HET
1398	193	12697	9	12	204	0:00:24-0:00:25	25	0.05	HOM	13:00.0	1.89133	1.89134	0.05HOM	25	2.032254	1.269137455	4	0	4 HOM
1399	194	12763	9	13	205	0:00:24-0:00:25	25	0.1	WT	13:00.0	3.3431	3.34312	0.1WT	25	1.968111	1.479421564	4	0	4 WT
1400	195	12829	9	14	206	0:00:24-0:00:25	25	0.1	HET	13:00.0	4.41381	4.41383	0.1HET	25	1.529421857	0.500326591	4	0	4 HET
1401	196	12895	9	15	207	0:00:24-0:00:25	25	0.1	HOM	13:00.0	7.37441	7.37444	0.1HOM	25	4.94337	1.195306503	4	1	4 HOM
1402	197	12961	9	16	208	0:00:24-0:00:25	25	0.1	WT	13:00.0	2.47247	2.47249	0.1WT	25	1.411252143	0.769107686	4	0	4 WT
1403	198	13027	9	17	209	0:00:24-0:00:25	25	0.1	HET	13:00.0	6.69031	6.69034	0.1HET	25	1.98885	0.747318271	4	1	4 HET
1404	199	13093	9	18	210	0:00:24-0:00:25	25	0.1	HOM	13:00.0	3.84619	3.84621	0.1HOM	25	1.219181014	0.832128407	4	0	4 HOM
1405	200	13159	9	19	211	0:00:24-0:00:25	25	0.5	WT	13:00.0	5.8067	5.80672	0.5WT	25	1.003829857	0.136115708	4	1	4 WT
1406	202	13291	9	21	213	0:00:24-0:00:25	25	0.5	HOM	13:00.0	0.106262	0.106262	0.5HOM	25	0	0	4	0	4 HOM
1407	204	13423	9	23	215	0:00:24-0:00:25	25	0.5	HET	13:00.0	6.43206	6.43208	0.5HET	25	2.115048	0.958390913	4	1	4 HET
1408	205	13489	9	24	216	0:00:24-0:00:25	25	0.5	HOM	13:00.0	7.78169	7.78172	0.5HOM	25	3.720442857	1.330477756	4	1	4 HOM
1409	208	13687	10	3	219	0:00:24-0:00:25	25	0.5	WT	13:01.0	1.08008	1.08008	0.5WT	25	0.209971286	0.037172714	4	0	4 WT
1410	210	13819	10	5	221	0:00:24-0:00:25	25	0.5	HET	13:01.0	0.734883	0.734886	0.5HET	25	1.844090857	0.983350064	4	0	4 HET
1411	211	13885	10	6	222	0:00:24-0:00:25	25	0.5	WT	13:01.0	0.182491	0.182492	0.5WT	25	0	0	4	0	4 WT
1412	213	14017	10	8	224	0:00:24-0:00:25	25	0.1	HET	13:01.0	0.283016	0.283017	0.1HET	25	0.546414714	0.403014291	4	0	4 HET
1413	214	14083	10	9	225	0:00:24-0:00:25	25	0.1	WT	13:01.0	6.49175	6.49178	0.1WT	25	2.584802857	1.428263162	4	1	4 WT
1414	215	14149	10	10	226	0:00:24-0:00:25	25	0.1	HOM	13:01.0	8.67875	8.67878	0.1HOM	25	2.879014357	4.5680578	4	1	4 HOM
1415	217	14281	10	12	228	0:00:24-0:00:25	25	0.1	WT	13:01.0	1.82199	1.82199	0.1WT	25	1.961622143	1.97381419	4	0	4 WT
1416	219	14413	10	14	230	0:00:24-0:00:25	25	0.05	HET	13:01.0	8.0851	8.08514	0.05HET	25	2.604767143	0.948816529	4	1	4 HET
1417	220	14479	10	15	231	0:00:24-0:00:25	25	0.05	WT	13:01.0	0.246689	0.246689	0.05WT	25	1.750391429	0.571549178	4	0	4 WT
1418	221	14545	10	16	232	0:00:24-0:00:25	25	0.05	HOM	13:01.0	1.09848	1.09848	0.05HOM	25	0.325223686	0.318979473	4	0	4 HOM
1419	222	14611	10	18	234	0:00:24-0:00:25	25	0.05	WT	13:01.0	8.98251	8.98255	0.05WT	25	2.8635	0.992887729	4	1	4 WT
1420	224	14743	10	20	236	0:00:24-0:00:25	25	0	HET	13:01.0	5.93649	5.93652	0.0-HET	25	0.911720857	0.63114733	4	1	4 HET
1421	225	14809	10	21	237	0:00:24-0:00:25	25	0	WT	13:01.0	3.95674	3.95675	0.0-WT	25	2.444163143	2.074162919	4	0	4 WT
1422	226	14875	10	22	238	0:00:24-0:00:25	25	0	HOM	13:01.0	2.88372	2.88373	0.0-HOM	25	1.955062857	0.990254499	4	0	4 HOM
1423	227	14941	10	23	239	0:00:24-0:00:25	25	0	HET	13:01.0	4.31645	4.31646	0.0-HET	25	1.008678571	0.418522585	4	0	4 HET
1424	228	15007	10	24	240	0:00:24-0:00:25	25	0	WT	13:01.0	5.36971	5.36973	0.0-WT	25	2.173942286	1.789427222	4	1	4 WT
1425	229	15073	11	1	241	0:00:24-0:00:25	25	0.05	HET	13:03.0	8.08113	8.08119	0.05HET	25	2.911951286	2.38134668	4	1	4 HET
1426	230	15139	11	2	242	0:00:24-0:00:25	25	0.05	HOM	13:03.0	1.41718	1.41719	0.05HOM	25	0.4094815	0.50135872	4	0	4 HOM
1427	231	15205	11	3	243	0:00:24-0:00:25	25	0.05	WT	13:03.0	4.91121	4.91123	0.05WT	25	1.758758571	1.23806334	4	1	4 WT
1428	232	15271	11	4	244	0:00:24-0:00:25	25	0.05	HET	13:03.0	9.89837	9.89841	0.05HET	25	2.925303143	1.145086292	4	1	4 HET
1429	233	15337	11	5	245	0:00:24-0:00:25	25	0.05	HOM	13:03.0	7.00513	7.00516	0.05HOM	25	1.516169857	1.269282766	4	1	4 HOM
1430	234	15403	11	6	246	0:00:24-0:00:25	25	0.05	WT	13:03.0	2.67152	2.67154	0.05WT	25	1.171690143	0.540371432	4	0	4 WT
1431	235	15469	11	7	247	0:00:24-0:00:25	25	0	HET	13:03.0	8.46037	8.46039	0.0-HET	25	0.534916443	0.388884892	4	1	4 HET
1432	236	15535	11	8	248	0:00:24-0:00:25	25	0	HOM	13:03.0	0.333799	0.333801	0.0-HOM	25	0.233586243	0.126148153	4	0	4 HOM
1433	237	15601	11	9	249	0:00:24-0:00:25	25	0	WT	13:03.0	5.11542	5.11544	0.0-WT	25	0	0	4	1	4 WT
1434	238	15667	11	10	250	0:00:24-0:00:25	25	0	HET	13:03.0	0.823372	0.823379	0.0-HET	25	1.192299714	1.569545383	4	0	4 HET
1435	239	15733	11	11	251	0:00:24-0:00:25	25	0	HOM	13:03.0	3.8551	3.85512	0.0-HOM	25	4.36581	3.033869983	4	0	4 HOM
1436	240	15799	11	12	252	0:00:24-0:00:25	25	0	WT	13:03.0	0.32962	0.329622	0.0-WT	25	2.863136143	1.808829927	4	0	4 WT
1437	241	15865	11	13	253	0:00:24-0:00:25	25	0.5	HET	13:03.0	0.315819	0.315821	0.5HET	25	0.603621714	0.113609504	4	0	4 HET
1438	243	15997	11	15	255	0:00:24-0:00:25	25	0.5	WT	13:03.0	0.901746	0.90175	0.5WT	25	2.220864286	0.675086586	4	0	4 WT
1439	244	16063	11	16	256	0:00:24-0:00:25	25	0.5	HET	13:03.0	4.57379	4.57381	0.5HET	25	2.40336	1.527346665	4	0	4 HET
1440	245	16129	11	17	257	0:00:24-0:00:25	25	0.5	HOM	13:03.0	0.940173	0.940179	0.5HOM	25	3.940088571	2.473759295	4	0	4 HOM
1441	246	16195	11	18	258	0:00:24-0:00:25	25	0.5	WT	13:03.0	6.43555	6.43558	0.5WT	25	2.534458857	1.562465359	4	1	4 WT
1442	247	16261	11	19	259	0:00:24-0:00:25	25	0.1	HET	13:03.0	3.75972	3.75973	0.1HET	25	1.483819429	0.70327409	4	0	4 HET
1443	248	16327	11	20	260	0:00:24-0:00:25	25	0.1	HOM	13:03.0	7.98295	7.98299	0.1HOM	25	0.0456878	0.097142031	4	1	4 HOM
1444	249	16393	11	21	261	0:00:24-0:00:25	25	0.1	WT	13:03.0	0.101253	0.101253	0.1WT	25	0.058464801	0.094748498	4	0	4 WT
1445	250	16459	11	22	262	0:00:24-0:00:25	25	0.1	HET	13:03.0	0.597268	0.597269	0.1HET	25	0.906252857	0.794057434	4	0	4 HET
1446	251	16525	11	23	263	0:00:24-0:00:25	25	0.1	HOM	13:03.0	6.57988	6.57991	0.1HOM	25	1.382247857	0.297391816	4	1	4 HOM
1447	252	16591	11	24	264	0:00:24-0:00:25	25	0.1	WT	13:03.0	5.974	5.97402	0.1WT	25	1.829352286	1.141634119	4	1	4 WT
1448	253	16657	12	1	265	0:00:24-0:00:25	25	0.1	HOM	13:03.0	3.67999	3.68	0.1HOM	25	2.392802857	0.634858216	4	0	4 HOM
1449	254	16723	12	2	266	0:00:24-0:00:25	25	0.1	WT	13:03.0	4.09467	4.09468	0.1WT	25	3.945447143	2.654153763	4	0	4 WT
1450	255	16789	12	3	267	0:00:24-0:00:25	25	0.1	HET	13:03.0	1.86538	1.86538	0.1HET	25	1.208657714	0.720422302	4	0	4 HET
1451	258	16987	12	6	270	0:00:24-0:00:25	25	0.1	HET	13:03.0	3.98316	3.98318	0.1HET	25	1.375691714	1.322622114	4	0	4 HET
1452	260	17119	12	8	272	0:00:24-0:00:25	25	0.05	WT	13:03.0	7.62965	7.62968	0.05WT	25	2.837144286	0.901900947	4	1	4 WT
1453	261	17185	12	9	273	0:00:24-0:00:25	25	0.05	HET	13:03.0	5.52973	5.52976	0.05HET	25	1.754498	1.683756845	4	1	4 HET
1454	262	17251	12	11	275	0:00:24-0:00:25	25	0.05	WT	13:03.0	5.43976	5.43978	0.05WT	25	1.868566571	2.240733401	4	1	4 WT
1455	264	17383	12	13	277	0:00:24-0:00:25	25	0	HOM	13:03.0	7.48741	7.48743	0.0-HOM	25	2.024857857	1.061040349	4	1	4 HOM
1456	265	17449	12	14	278	0:00:24-0:00:25	25	0	WT	13:03.0	2.17683	2.17684	0.0-WT	25	3.012535143	2.027379406	4	0	4 WT
1457	266	17515	12	15	279	0:00:24-0:00:25	25	0	HET	13:03.0	0.884234	0.884239	0.0-HET	25	0.243097857	0.064655057	4	0	4 HET
1458	267	17581	12	16	280	0:00:24-0:00:25	25	0	HOM	13:03.0	9.89	9.89004	0.0-HOM	25	0.309036571	0.056648521	4	1	4 HOM
1459	268	17647	12	17	281	0:00:24-0:00:25	25	0	WT	13:03.0	4.45534	4.45537	0.0-WT	25	2.733588843	3.15679764	4	0	4 WT
1460	271	17845	12	20	284	0:00:24-0:00:25	25	0.5	WT	13:03.0	0.644674	0.644679	0.5WT	25	2.579924286	0.920888844	4	0	4 WT
1461	272	17911	12	21	285	0:00:24-0:00:25	25	0.5	HET	13:03.0	1.62353	1.62353	0.5HET	25	3.487605714	1.444416381	4	0	4 HET
1462	274	18043	12	23	287	0:00:24-0:00:25	25	0.5	WT	13:03.0	2.23609	2.2361	0.5WT	25	1.560275857	0.86528225	4	0	4 WT
1463	276	18175	1	1	1	0:00:24-0:00:25	25	0	WT	27:35.0	4.03586	4.03588	0.0-WT	25	0.801322781	0.673350202	4	0	4 WT
1464	277	18241	1	2	2	0:00:24-0:00:25	25	0	HET	27:35.0	4.84004	4.84006	0.0-HET	25	0.163810429	0.064965735	4	1	4 HET
1465	278	18307	1	3	3	0:00:24-0:00:25	25	0	HOM	27:35.0	3.50161	3.50162	0.0-HOM	25	2.488771143	1.164110607	4	0	4 HOM
1466	279	18373	1	4	4	0:00:24-0:00:25	25	0	WT	27:35.0	0.165485	0.165485	0.0-WT	25	0.235994971	0.217527265	4	0	4 WT
1467	280	18439	1	5	5	0:00:24-0:00:25	25	0	HET	27:35.0	0.743442	0.743445	0.0-HET	25	0.224115	0.036495489	4	0	4 HET
1468	281	18505	1	6	6	0:00:24-0:00:25	25	0	HOM	27:35.0	0.15139	0.151391	0.0-HOM	25	0.505809371	0.26143492	4	0	4 HOM
1469	282	18571	1	7	7	0:00:24-0:00:25	25	0.05	WT	27:35.0	4.17355	20.8678	0.05WT	25	1.892991	1.198148389	4	0	4 WT
1470	283	18637	1	8	8	0:00:24-0:00:25	25	0.05	HET	27:35.0	1.87635	1.87636	0.05HET	25	2.039051429	1.755701919	4	0	4 HET
1471	285	18769	1	10	10	0:00:24-0:00:25	25	0.05	WT	27:35.0	6.23528	6.2353	0.05WT	25	4.268077143	2.122971174	4	1	4 WT
1472	286	18835	1	11	11	0:00:24-0:00:25	25	0.05	HET	27:35.0	0.1489	0.1489	0.05HET	25	0.301975243	0.146940013	4	0	4 HET
1473	287	18901	1	12	12	0:00:24-0:00:25	25	0.05	HOM	27:35.0	3.19686	3.19687	0.05HOM	25	1.935541286	1.193304716	4	0	4 HOM
1474	292	19231	1	17	17	0:00:24-0:00:25	25	0.1	HET	27:35.0	3.44546	3.44548	0.1HET	25	1.933311429	0.46450913	4	0	4 HET
1475	293	19297	1	18	18	0:00:24-0:00:25	25	0.1	HOM	27:35.0	3.77407	3.77409	0.1HOM	25	1.292337286	0.717589688	4	0	4 HOM
1476	295	19429	1	21	21	0:00:24-0:00:25	25	0.5	HOM	27:35.0	3.28943	3.28944	0.5HOM	25	3.443564286	1.917945882	4	0	4 HOM
1477	296	19495	1	22	22	0:00:24-0:00:25	25	0.5	WT	27:35.0	3.76613	3.76614	0.5WT	25	0.274021571	0.106959045	4	0	4 WT
1478	298	19627	1	24	24	0:00:24-0:00:25	25	0.5	HOM	27:35.0	0.906689	0.906693	0.5HOM	25	2.740044286	1.10133717	4	0	4 HOM
1479	299	19693	2	1	25	0:00:24-0:00:25	25	0.5	HOM	32:40.0	6.00759	6.00762	0.5HOM	25	1.538928957	1.121068475	4	1	4 HOM
1480	301	19825	2	3	27	0:00:24-0:00:25	25	0.5	WT	32:40.0	10.012	10.0121	0.5WT	25	1.933544286	0.539906297	4	1	4 WT
1481	304	20023	2	6	30	0:00:24-0:00:25	25	0.5	WT	32:40.0	1.62372	1.62373	0.5WT	25	1.760221429	1.50419859	4	0	4 WT
1482	305	20089	2	7	31	0:00:24-0:00:25	25	0.1	HOM	32:40.0	4.46781	4.46783	0.1HOM	25	1.123118143	0.992475164	4	0	4 HOM
1483	306	20155	2	8	32	0:00:24-0:00:25	25	0.1	HET	32:40.0	7.65263	7.65266	0.1HET	25	2.388199714	1.808957235	4	1	4 HET
1484	307	20221	2	9	33	0:00:24-0:00:25	25	0.1	WT	32:40.0	0.0752621	0.0752624	0.1WT	25	0.077457057	0.018130441	4	0	4 WT
1485	308	20287	2	10	34	0:00:24-0:00:25	25	0.1	HOM	32:40.0	3.60327	3.60329	0.1HOM	25	2.768916429	1.993770189	4	0	4 HOM
1486	310	20419	2	12	36	0:00:24-0:00:25	25	0.1	WT	32:40.0	2.54479	2.5448	0.1WT	25	0.060666271	0.029478073	4	0	4 WT
1487	311	20485	2	13	37	0:00:24-0:00:25	25	0.05	HOM	32:40.0	0.693682	0.693684	0.05HOM	25	2.060246571	1.726436057	4	0	4 HOM
1488	313	20617	2	17	41	0:00:24-0:00:25	25	0.05	HET	32:40.0	7.79009	7.79013	0.05HET	25	0.543101886	0.355257238	4	1	4 HET
1489	314	20683	2	18	42	0:00:24-0:00:25	25	0.05	WT	32:40.0	4.36656	4.36658	0.05WT	25	1.550958286	1.098421085	4	0	4 WT
1490	315	20749	2	19	43	0:00:24-0:00:25	25	0	HOM	32:40.0	2.88232	2.88234	0.0-HOM	25	1.119408286	0.788965624	4	0	4 HOM
1491	316	20815	2	20	44	0:00:24-0:00:25	25	0	HET	32:40.0	4.5316	4.53161	0.0-HET	25	2.934715714	0.639889361	4	0	4 HET
1492	317	20881	2	21	45	0:00:24-0:00:25	25	0	WT	32:40.0	4.69829	4.69831	0.0-WT	25	3.699627143	2.272381261	4	1	4 WT
1493	318	20947	2	22	46	0:00:24-0:00:25	25	0	HOM	32:40.0	2.32036	2.32037	0.0-HOM	25	1.572600714	1.184943005	4	0	4 HOM
1494	319	21013	2	23	47	0:00:24-0:00:25	25	0	HET	32:40.0	6.9948	6.99483	0.0-HET	25	2.357226286	1.315801173	4	1	4 HET
1495	320	21079	2	24	48	0:00:24-0:00:25	25	0	WT	32:40.0	5.89628	5.8963	0.0-WT	25	0	0	4	1	4 WT
1496	322	21211	3	2	50	0:00:24-0:00:25	25	0.05	HOM	34:27.0	6.36538	6.36541	0.05HOM	25	0.647376	0.584247193	4	1	4 HOM
1497	323	21277	3	3	51	0:00:24-0:00:25	25	0.05	WT	34:27.0	0.7887	0.788703	0.05WT	25	0.341070286	0.133718853	4	0	4 WT
1498	324	21343	3	4	52	0:00:24-0:00:25	25	0.05	HET	34:27.0	5.95221	5.95223	0.05HET	25	0.706166143	0.242854386	4	1	4 HET
1499	325	21409	3	5	53	0:00:24-0:00:25	25	0.05	HOM	34:27.0	3.12226	3.12227	0.05HOM	25	2.345938143	1.274259289	4	0	4 HOM
1500	327	21541	3	7	55	0:00:24-0:00:25	25	0	HET	34:27.0	6.39083	6.39086	0.0-HET	25	3.617431429	1.614591682	4	1	4 HET
1501	328	21607	3	8	56	0:00:24-0:00:25	25	0	HOM	34:27.0	2.0048	2.00481	0.0-HOM	25	1.570321714	1.186172665	4	0	4 HOM
1502	329	21673	3	9	57	0:00:24-0:00:25	25	0	WT	34:27.0	2.76353	2.76354	0.0-WT	25	1.078725386	0.90602774	4	0	4 WT
1503	331	21805	3	11	59	0:00:24-0:00:25	25	0	HOM	34:27.0	3.34767	3.34768	0.0-HOM	25	1.684990714	0.68590983	4	0	4 HOM
1504	332	21871	3	12	60	0:00:24-0:00:25	25	0	WT	34:27.0	0.319988	0.319989	0.0-WT	25	0.266722586	0.088479771	4	0	4 WT
1505	333	21937	3	13	61	0:00:24-0:00:25	25	0.5	HET	34:27.0	0	-	0.5HET	25	0	0	4	0	4 HET
1506	334	22003	3	14	62	0:00:24-0:00:25	25	0.5	HOM	34:27.0	1.4712	1.47121	0.5HOM	25	3.065151	2.623836642	4	0	4 HOM
1507	335	22069	3	15	63	0:00:24-0:00:25	25	0.5	WT	34:27.0	5.04517	5.0452	0.5WT	25	1.369665714	2.05538301	4	1	4 WT
1508	336	22135	3	16	64	0:00:24-0:00:25	25	0.5	HET	34:27.0	9.67678	9.67682	0.5HET	25	2.412841429	1.000146156	4	1	4 HET
1509	337	22201	3	17	65	0:00:24-0:00:25	25	0.5	HOM	34:27.0	0.551801	0.551803	0.5HOM	25	1.022981286	0.8599461	4	0	4 HOM
1510	339	22333	3	19	67	0:00:24-0:00:25	25	0.1	HET	34:27.0	1.43623	1.43624	0.1HET	25	0.257138	0.374345331	4	0	4 HET
1511	340	22399	3	20	68	0:00:24-0:00:25	25	0.1	HOM	34:27.0	4.88824	4.88826	0.1HOM	25	4.552258571	2.337052578	4	1	4 HOM
1512	341	22465	3	21	69	0:00:24-0:00:25	25	0.1	WT	34:27.0	0.545445	0.545447	0.1WT	25	0.408891043	0.400085247	4	0	4 WT
1513	342	22531	3	22	70	0:00:24-0:00:25	25	0.1	HET	34:27.0	5.67595	5.67597	0.1HET	25	3.091085286	1.921785279	4	1	4 HET
1514	343	22597	3	23	71	0:00:24-0:00:25	25	0.1	HOM	34:27.0	2.41944	2.90335	0.1HOM	25	0	0	4	0	4 HOM
1515	344	22663	3	24	72	0:00:24-0:00:25	25	0.1	WT	34:27.0	5.30215	5.30216	0.1WT	25	1.942092857	0.980518744	4	1	4 WT
1516	345	22729	4	1	73	0:00:24-0:00:25	25	0.1	HOM	34:29.0	4.18441	4.18442	0.1HOM	25	2.416478286	1.132929452	4	0	4 HOM
1517	346	22795	4	3	75	0:00:24-0:00:25	25	0.1	HET	34:29.0	8.45635	8.45639	0.1HET	25	2.678828571	0.912992859	4	1	4 HET
1518	347	22861	4	4	76	0:00:24-0:00:25	25	0.1	HOM	34:29.0	1.19154	1.19154	0.1HOM	25	1.409958429	0.69717685	4	0	4 HOM
1519	348	22927	4	5	77	0:00:24-0:00:25	25	0.1	WT	34:29.0	0.225112	0.225113	0.1WT	25	0.185796757	0.061208163	4	0	4 WT
1520	349	22993	4	6	78	0:00:24-0:00:25	25	0.1	HET	34:29.0	2.7508	2.75081	0.1HET	25	1.293036571	0.87054493	4	0	4 HET
1521	350	23059	4	7	79	0:00:24-0:00:25	25	0.05	HOM	34:29.0	6.88078	6.88081	0.05HOM	25	0	0	4	1	4 HOM
1522	351	23125	4	8	80	0:00:24-0:00:25	25	0.05	WT	34:29.0	0.27949	0.279491	0.05WT	25	0.251510857	0.081753992	4	0	4 WT
1523	352	23191	4	9	81	0:00:24-0:00:25	25	0.05	HET	34:29.0	4.25363	4.25365	0.05HET	25	3.177642857	0.803406579	4	0	4 HET
1524	353	23257	4	10	82	0:00:24-0:00:25	25	0.05	HOM	34:29.0	4.80436	4.80438	0.05HOM	25	1.755331714	0.810469759	4	1	4 HOM
1525	357	23521	4	14	86	0:00:24-0:00:25	25	0	WT	34:29.0	1.56525	1.56525	0.0-WT	25	3.632434286	1.566236106	4	0	4 WT
1526	358	23587	4	15	87	0:00:24-0:00:25	25	0	HET	34:29.0	6.47359	6.47362	0.0-HET	25	0.601811571	0.490743471	4	1	4 HET
1527	360	23719	4	18	90	0:00:24-0:00:25	25	0	HET	34:29.0	2.26844	2.26845	0.0-HET	25	1.577842571	0.951897102	4	0	4 HET
1528	361	23785	4	19	91	0:00:24-0:00:25	25	0.5	HOM	34:29.0	2.56235	2.56236	0.5HOM	25	1.487772	1.748051726	4	0	4 HOM
1529	363	23917	4	21	93	0:00:24-0:00:25	25	0.5	HET	34:29.0	0.684154	0.684158	0.5HET	25	1.641836286	1.098903873	4	0	4 HET
1530	364	23983	4	22	94	0:00:24-0:00:25	25	0.5	HOM	34:29.0	9.8595	9.85953	0.5HOM	25	0.192014857	0.045201036	4	1	4 HOM
1531	365	24049	4	23	95	0:00:24-0:00:25	25	0.5	WT	34:29.0	3.55758	3.55759	0.5WT	25	0.487945286	0.556373516	4	0	4 WT
1532	366	24115	4	24	96	0:00:24-0:00:25	25	0.5	HET	34:29.0	1.52391	1.52391	0.5HET	25	0	0	4	0	4 HET
1533	367	24181	5	2	98	0:00:24-0:00:25	25	0	HET	34:30.0	4.94671	4.94673	0.0-HET	25	0	0	4	1	4 HET
1534	368	24247	5	3	99	0:00:24-0:00:25	25	0	HOM	34:30.0	7.26484	7.26487	0.0-HOM	25	1.844229143	0.865538789	4	1	4 HOM
1535	370	24379	5	8	104	0:00:24-0:00:25	25	0.05	HET	34:30.0	3.45476	3.45478	0.05HET	25	0	0	4	0	4 HET
1536	372	24511	5	11	107	0:00:24-0:00:25	25	0.05	HET	34:30.0	8.4932	8.49324	0.05HET	25	2.445215286	2.63914923	4	1	4 HET
1537	375	24709	5	14	110	0:00:24-0:00:25	25	0.1	HET	34:30.0	3.74327	3.74328	0.1HET	25	2.717921429	1.717109229	4	0	4 HET
1538	376	24775	5	15	111	0:00:24-0:00:25	25	0.1	HOM	34:30.0	0	-	0.1HOM	25	1.323639429	1.024246744	4	0	4 HOM
1539	378	24907	5	17	113	0:00:24-0:00:25	25	0.1	HET	34:30.0	0.407854	0.407856	0.1HET	25	0.478415657	0.859803719	4	0	4 HET
1540	379	24973	5	18	114	0:00:24-0:00:25	25	0.1	HOM	34:30.0	6.3781	6.37813	0.1HOM	25	3.544155714	1.370413137	4	1	4 HOM
1541	382	25171	5	21	117	0:00:24-0:00:25	25	0.5	HOM	34:30.0	2.90966	2.90967	0.5HOM	25	6.449035714	2.875613417	4	0	4 HOM
1542	388	25567	6	3	123	0:00:24-0:00:25	25	0.5	WT	34:31.1	0.947799	0.947803	0.5WT	25	1.254090143	1.09461903	4	0	4 WT
1543	390	25699	6	5	125	0:00:24-0:00:25	25	0.5	HET	34:31.1	6.14872	6.14875	0.5HET	25	5.548232857	2.621915632	4	1	4 HET
1544	391	25765	6	6	126	0:00:24-0:00:25	25	0.5	WT	34:31.1	2.92243	2.92244	0.5WT	25	0.284694286	0.083926684	4	0	4 WT
1545	394	25963	6	10	130	0:00:24-0:00:25	25	0.1	HOM	34:31.1	5.95779	5.95781	0.1HOM	25	2.222066286	1.250461419	4	1	4 HOM
1546	396	26095	6	12	132	0:00:24-0:00:25	25	0.1	WT	34:31.1	0.436884	0.436886	0.1WT	25	0.123595614	0.081917985	4	0	4 WT
1547	398	26227	6	14	134	0:00:24-0:00:25	25	0.05	HET	34:31.1	0.29376	0.293761	0.05HET	25	1.062497143	1.699373055	4	0	4 HET
1548	402	26491	6	18	138	0:00:24-0:00:25	25	0.05	WT	34:31.1	6.77986	6.77989	0.05WT	25	1.961766286	1.142941225	4	1	4 WT
1549	404	26623	6	20	140	0:00:24-0:00:25	25	0	HET	34:31.1	4.36084	4.36086	0.0-HET	25	2.683890286	3.117624921	4	0	4 HET
1550	405	26689	6	21	141	0:00:24-0:00:25	25	0	WT	34:31.1	5.81239	5.81242	0.0-WT	25	2.749578571	1.04109058	4	1	4 WT
1551	406	26755	6	22	142	0:00:24-0:00:25	25	0	HOM	34:31.1	2.65231	2.65232	0.0-HOM	25	3.459727143	0.906673772	4	0	4 HOM
1552	407	26821	6	23	143	0:00:24-0:00:25	25	0	HET	34:31.1	0.307045	0.307047	0.0-HET	25	0.184876429	0.079722989	4	0	4 HET
1553	408	26887	7	1	145	0:00:24-0:00:25	25	0.05	HET	34:32.1	1.98236	1.98237	0.05HET	25	0.225916143	0.066528201	4	0	4 HET
1554	409	26953	7	2	146	0:00:24-0:00:25	25	0.05	HOM	34:32.1	9.26083	9.26086	0.05HOM	25	4.149767143	1.545972407	4	1	4 HOM
1555	411	27085	7	4	148	0:00:24-0:00:25	25	0.05	HET	34:32.1	9.76435	9.76439	0.05HET	25	0.813561029	1.052858082	4	1	4 HET
1556	412	27151	7	5	149	0:00:24-0:00:25	25	0.05	HOM	34:32.1	6.77239	6.77242	0.05HOM	25	2.453819286	1.704826601	4	1	4 HOM
1557	415	27349	7	8	152	0:00:24-0:00:25	25	0	HOM	34:32.1	4.27626	4.27628	0.0-HOM	25	0	0	4	0	4 HOM
1558	416	27415	7	9	153	0:00:24-0:00:25	25	0	WT	34:32.1	5.70164	5.70167	0.0-WT	25	3.54386	1.28892968	4	1	4 WT
1559	417	27481	7	10	154	0:00:24-0:00:25	25	0	HET	34:32.1	7.98273	7.98276	0.0-HET	25	1.655349857	1.267898776	4	1	4 HET
1560	418	27547	7	11	155	0:00:24-0:00:25	25	0	HOM	34:32.1	0.206044	0.206045	0.0-HOM	25	0.199838129	0.124432008	4	0	4 HOM
1561	419	27613	7	12	156	0:00:24-0:00:25	25	0	WT	34:32.1	7.51873	7.51876	0.0-WT	25	4.741980057	3.860151174	4	1	4 WT
1562	420	27679	7	13	157	0:00:24-0:00:25	25	0.5	HET	34:32.1	5.29318	5.2932	0.5HET	25	3.37518	1.86058891	4	1	4 HET
1563	421	27745	7	14	158	0:00:24-0:00:25	25	0.5	HOM	34:32.1	5.79521	5.79524	0.5HOM	25	1.540955571	0.909651702	4	1	4 HOM
1564	422	27811	7	15	159	0:00:24-0:00:25	25	0.5	WT	34:32.1	6.14157	6.1416	0.5WT	25	0	0	4	1	4 WT
1565	428	28207	7	21	165	0:00:24-0:00:25	25	0.1	WT	34:32.1	1.60112	1.60113	0.1WT	25	2.629341571	1.186960434	4	0	4 WT
1566	429	28273	7	23	167	0:00:24-0:00:25	25	0.1	HOM	34:32.1	4.56383	4.56385	0.1HOM	25	0.028962456	0.029281924	4	0	4 HOM
1567	431	28405	8	1	169	0:00:24-0:00:25	25	0.1	HOM	34:33.1	3.6234	3.62341	0.1HOM	25	3.814302857	1.519407652	4	0	4 HOM
1568	432	28471	8	2	170	0:00:24-0:00:25	25	0.1	WT	34:33.1	6.33618	6.33621	0.1WT	25	2.770008714	1.532825163	4	1	4 WT
1569	433	28537	8	3	171	0:00:24-0:00:25	25	0.1	HET	34:33.1	1.23715	1.23715	0.1HET	25	1.997442571	1.292430549	4	0	4 HET
1570	436	28735	8	6	174	0:00:24-0:00:25	25	0.1	HET	34:33.1	2.7425	2.74251	0.1HET	25	0.021256989	0.022598218	4	0	4 HET
1571	437	28801	8	7	175	0:00:24-0:00:25	25	0.05	HOM	34:33.1	7.05814	7.05816	0.05HOM	25	1.422668286	0.881241427	4	1	4 HOM
1572	439	28933	8	9	177	0:00:24-0:00:25	25	0.05	HET	34:33.1	7.14111	7.14114	0.05HET	25	2.265922857	0.876776458	4	1	4 HET
1573	440	28999	8	10	178	0:00:24-0:00:25	25	0.05	HOM	34:33.1	2.28353	2.28354	0.05HOM	25	1.312080743	1.697046118	4	0	4 HOM
1574	441	29065	8	11	179	0:00:24-0:00:25	25	0.05	WT	34:33.1	5.86443	5.86445	0.05WT	25	1.467365143	0.621054876	4	1	4 WT
1575	442	29131	8	12	180	0:00:24-0:00:25	25	0.05	HET	34:33.1	5.04405	5.04406	0.05HET	25	1.558695571	0.824641664	4	1	4 HET
1576	443	29197	8	13	181	0:00:24-0:00:25	25	0	HOM	34:33.1	10.123	10.123	0.0-HOM	25	5.120158571	1.610347867	4	1	4 HOM
1577	444	29263	8	14	182	0:00:24-0:00:25	25	0	WT	34:33.1	4.65969	4.65971	0.0-WT	25	2.417332	1.486829717	4	1	4 WT
1578	445	29329	8	15	183	0:00:24-0:00:25	25	0	HET	34:33.1	0.486163	0.486167	0.0-HET	25	1.015548	0.636303845	4	0	4 HET
1579	446	29395	8	16	184	0:00:24-0:00:25	25	0	HOM	34:33.1	0.105546	0.105546	0.0-HOM	25	0.432392	0.324637049	4	0	4 HOM
1580	448	29527	8	18	186	0:00:24-0:00:25	25	0	HET	34:33.1	1.48772	1.48773	0.0-HET	25	3.167127571	1.983598426	4	0	4 HET
1581	450	29659	8	20	188	0:00:24-0:00:25	25	0.5	WT	34:33.1	2.82128	2.82129	0.5WT	25	2.444854286	1.537210945	4	0	4 WT
1582	451	29725	8	21	189	0:00:24-0:00:25	25	0.5	HET	34:33.1	3.39895	3.39897	0.5HET	25	0.129140057	0.032762746	4	0	4 HET
1583	452	29791	8	22	190	0:00:24-0:00:25	25	0.5	HOM	34:33.1	1.54829	1.5483	0.5HOM	25	1.547141971	0.999582456	4	0	4 HOM
1584	453	29857	8	24	192	0:00:24-0:00:25	25	0.5	HET	34:33.1	1.82565	1.82565	0.5HET	25	0.385851857	0.200748566	4	0	4 HET
1585	454	29923	9	1	193	0:00:24-0:00:25	25	0	WT	34:34.9	7.51585	7.51588	0.0-WT	25	0.901733371	0.703988941	4	1	4 WT
1586	455	29989	9	2	194	0:00:24-0:00:25	25	0	HET	34:34.9	9.20435	9.20439	0.0-HET	25	0.9946023	1.000491	4	1	4 HET
1587	456	30055	9	3	195	0:00:24-0:00:25	25	0	HOM	34:34.9	0.285716	0.285717	0.0-HOM	25	0.6315102	0.697621427	4	0	4 HOM
1588	457	30121	9	4	196	0:00:24-0:00:25	25	0	WT	34:34.9	5.52814	5.52816	0.0-WT	25	1.209239571	0.686007294	4	1	4 WT
1589	459	30253	9	6	198	0:00:24-0:00:25	25	0	HOM	34:34.9	4.37932	4.37934	0.0-HOM	25	2.253341429	0.900267268	4	0	4 HOM
1590	462	30451	9	9	201	0:00:24-0:00:25	25	0.05	HOM	34:34.9	6.67032	6.67035	0.05HOM	25	0.593299	0.576721276	4	1	4 HOM
1591	463	30517	9	10	202	0:00:24-0:00:25	25	0.05	WT	34:34.9	6.81071	6.81074	0.05WT	25	2.293651429	0.738786859	4	1	4 WT
1592	464	30583	9	11	203	0:00:24-0:00:25	25	0.05	HET	34:34.9	4.97943	4.97945	0.05HET	25	2.159125714	1.058595804	4	1	4 HET
1593	465	30649	9	12	204	0:00:24-0:00:25	25	0.05	HOM	34:34.9	5.2546	5.25462	0.05HOM	25	1.454590429	0.94206514	4	1	4 HOM
1594	466	30715	9	13	205	0:00:24-0:00:25	25	0.1	WT	34:34.9	4.21406	4.21408	0.1WT	25	3.192831429	1.29712637	4	0	4 WT
1595	467	30781	9	14	206	0:00:24-0:00:25	25	0.1	HET	34:34.9	4.16411	4.16413	0.1HET	25	0	0	4	0	4 HET
1596	470	30979	9	17	209	0:00:24-0:00:25	25	0.1	HET	34:34.9	5.18696	5.18698	0.1HET	25	1.698455429	1.019392371	4	1	4 HET
1597	472	31111	9	19	211	0:00:24-0:00:25	25	0.5	WT	34:34.9	5.22878	5.2288	0.5WT	25	0.168815186	0.211468692	4	1	4 WT
1598	473	31177	9	20	212	0:00:24-0:00:25	25	0.5	HET	34:34.9	4.35611	4.35613	0.5HET	25	1.827406286	1.346898024	4	0	4 HET
1599	474	31243	9	21	213	0:00:24-0:00:25	25	0.5	HOM	34:34.9	6.85568	6.85571	0.5HOM	25	2.0645427	2.61266204	4	1	4 HOM
1600	475	31309	9	22	214	0:00:24-0:00:25	25	0.5	WT	34:34.9	7.99363	7.99366	0.5WT	25	5.686230286	3.112936483	4	1	4 WT
1601	476	31375	9	23	215	0:00:24-0:00:25	25	0.5	HET	34:34.9	2.92117	2.92119	0.5HET	25	0.536598571	0.501509195	4	0	4 HET
1602	480	31639	10	3	219	0:00:24-0:00:25	25	0.5	WT	34:35.1	2.81465	2.81466	0.5WT	25	0	0	4	0	4 WT
1603	481	31705	10	4	220	0:00:24-0:00:25	25	0.5	HOM	34:35.1	4.67811	4.67814	0.5HOM	25	3.36153	1.835384988	4	1	4 HOM
1604	482	31771	10	5	221	0:00:24-0:00:25	25	0.5	HET	34:35.1	0.274444	0.274446	0.5HET	25	0	0	4	0	4 HET
1605	483	31837	10	6	222	0:00:24-0:00:25	25	0.5	WT	34:35.1	0.260327	0.260328	0.5WT	25	0.1996227	0.10616141	4	0	4 WT
1606	484	31903	10	7	223	0:00:24-0:00:25	25	0.1	HOM	34:35.1	5.68351	5.68353	0.1HOM	25	2.784418571	1.202539475	4	1	4 HOM
1607	485	31969	10	8	224	0:00:24-0:00:25	25	0.1	HET	34:35.1	0.221397	0.221397	0.1HET	25	0.131135329	0.031674	4	0	4 HET
1608	486	32035	10	10	226	0:00:24-0:00:25	25	0.1	HOM	34:35.1	3.76552	3.76553	0.1HOM	25	0	0	4	0	4 HOM
1609	488	32167	10	12	228	0:00:24-0:00:25	25	0.1	WT	34:35.1	8.84244	8.84248	0.1WT	25	2.160123714	1.322054693	4	1	4 WT
1610	489	32233	10	13	229	0:00:24-0:00:25	25	0.05	HOM	34:35.1	1.36539	1.36539	0.05HOM	25	2.740012857	0.778581437	4	0	4 HOM
1611	490	32299	10	14	230	0:00:24-0:00:25	25	0.05	HET	34:35.1	10.6966	10.6967	0.05HET	25	4.305907143	3.29718663	4	1	4 HET
1612	491	32365	10	15	231	0:00:24-0:00:25	25	0.05	WT	34:35.1	3.04559	3.04561	0.05WT	25	2.277127429	1.18636332	4	0	4 WT
1613	492	32431	10	16	232	0:00:24-0:00:25	25	0.05	HOM	34:35.1	2.44834	2.44835	0.05HOM	25	2.402745286	1.323389434	4	0	4 HOM
1614	493	32497	10	17	233	0:00:24-0:00:25	25	0.05	HET	34:35.1	9.69262	9.69266	0.05HET	25	1.579411714	0.629006572	4	1	4 HET
1615	495	32629	10	19	235	0:00:24-0:00:25	25	0	HOM	34:35.1	5.08638	5.0864	0.0-HOM	25	1.747005429	0.661277608	4	1	4 HOM
1616	497	32761	10	21	237	0:00:24-0:00:25	25	0	WT	34:35.1	0.177989	0.177989	0.0-WT	25	0	0	4	0	4 WT
1617	500	32959	10	24	240	0:00:24-0:00:25	25	0	WT	34:35.1	7.49429	7.49432	0.0-WT	25	2.017896	1.008769424	4	1	4 WT
1618	501	33025	11	1	241	0:00:24-0:00:25	25	0.05	HET	34:36.1	6.78771	6.78773	0.05HET	25	2.491906143	1.034833251	4	1	4 HET
1619	502	33091	11	3	243	0:00:24-0:00:25	25	0.05	WT	34:36.1	8.88851	8.88855	0.05WT	25	4.621651429	2.32422033	4	1	4 WT
1620	503	33157	11	4	244	0:00:24-0:00:25	25	0.05	HET	34:36.1	5.14739	5.14741	0.05HET	25	1.982193286	1.045205284	4	1	4 HET
1621	504	33223	11	5	245	0:00:24-0:00:25	25	0.05	HOM	34:36.1	5.52419	5.52421	0.05HOM	25	1.484302429	2.007354846	4	1	4 HOM
1622	505	33289	11	6	246	0:00:24-0:00:25	25	0.05	WT	34:36.1	4.41553	4.41555	0.05WT	25	2.205965857	1.121184338	4	0	4 WT
1623	506	33355	11	7	247	0:00:24-0:00:25	25	0	HET	34:36.1	4.71379	4.71381	0.0-HET	25	2.369891429	1.138230861	4	1	4 HET
1624	507	33421	11	8	248	0:00:24-0:00:25	25	0	HOM	34:36.1	8.58389	8.58393	0.0-HOM	25	3.690508571	2.043959196	4	1	4 HOM
1625	508	33487	11	9	249	0:00:24-0:00:25	25	0	WT	34:36.1	4.21657	4.21658	0.0-WT	25	1.711349857	1.059908005	4	0	4 WT
1626	509	33553	11	10	250	0:00:24-0:00:25	25	0	HET	34:36.1	8.78419	8.78423	0.0-HET	25	4.148462857	1.438116923	4	1	4 HET
1627	511	33685	11	12	252	0:00:24-0:00:25	25	0	WT	34:36.1	4.8077	4.80772	0.0-WT	25	1.837219714	1.308639091	4	1	4 WT
1628	512	33751	11	13	253	0:00:24-0:00:25	25	0.5	HET	34:36.1	6.15799	6.15801	0.5HET	25	3.386813143	1.874428883	4	1	4 HET
1629	513	33817	11	14	254	0:00:24-0:00:25	25	0.5	HOM	34:36.1	9.44891	9.44895	0.5HOM	25	0.644066	0.513031796	4	1	4 HOM
1630	514	33883	11	15	255	0:00:24-0:00:25	25	0.5	WT	34:36.1	5.19305	5.19307	0.5WT	25	2.784156857	2.41940726	4	1	4 WT
1631	515	33949	11	16	256	0:00:24-0:00:25	25	0.5	HET	34:36.1	6.7229	6.72293	0.5HET	25	1.239999	0.577484894	4	1	4 HET
1632	516	34015	11	17	257	0:00:24-0:00:25	25	0.5	HOM	34:36.1	0.0987774	0.0987777	0.5HOM	25	1.450888286	1.230211559	4	0	4 HOM
1633	517	34081	11	18	258	0:00:24-0:00:25	25	0.5	WT	34:36.1	7.92513	7.92517	0.5WT	25	2.93749	1.678779889	4	1	4 WT
1634	518	34147	11	19	259	0:00:24-0:00:25	25	0.1	HET	34:36.1	3.86212	3.86213	0.1HET	25	1.216238714	1.325158606	4	0	4 HET
1635	519	34213	11	20	260	0:00:24-0:00:25	25	0.1	HOM	34:36.1	3.94442	3.94444	0.1HOM	25	2.862536	1.660111318	4	0	4 HOM
1636	520	34279	11	21	261	0:00:24-0:00:25	25	0.1	WT	34:36.1	5.56441	5.56443	0.1WT	25	1.903320714	1.223215164	4	1	4 WT
1637	521	34345	11	22	262	0:00:24-0:00:25	25	0.1	HET	34:36.1	10.1074	10.1074	0.1HET	25	1.370316286	1.340278038	4	1	4 HET
1638	522	34411	11	23	263	0:00:24-0:00:25	25	0.1	HOM	34:36.1	5.75467	5.7547	0.1HOM	25	3.991257143	1.440579495	4	1	4 HOM
1639	523	34477	11	24	264	0:00:24-0:00:25	25	0.1	WT	34:36.1	3.31397	3.31398	0.1WT	25	3.247503286	1.959396564	4	0	4 WT
1640	524	34543	12	1	265	0:00:24-0:00:25	25	0.1	HOM		4.21654	4.21656	0.1HOM	25	1.566954857	1.572503193	4	0	4 HOM
1641	525	34609	12	2	266	0:00:24-0:00:25	25	0.1	WT		3.10273	3.10275	0.1WT	25	1.073512	0.517390917	4	0	4 WT
1642	526	34675	12	3	267	0:00:24-0:00:25	25	0.1	HET		3.7392	3.73922	0.1HET	25	2.683635714	1.455323755	4	0	4 HET
1643	527	34741	12	4	268	0:00:24-0:00:25	25	0.1	HOM		3.36159	3.3616	0.1HOM	25	2.575920271	1.999325806	4	0	4 HOM
1644	528	34807	12	5	269	0:00:24-0:00:25	25	0.1	WT		3.00604	3.00605	0.1WT	25	0.7041768	0.934000903	4	0	4 WT
1645	529	34873	12	6	270	0:00:24-0:00:25	25	0.1	HET		0.468723	0.468724	0.1HET	25	0.165453143	0.057074345	4	0	4 HET
1646	530	34939	12	7	271	0:00:24-0:00:25	25	0.05	HOM		4.82013	4.82015	0.05HOM	25	3.352947143	1.230207625	4	1	4 HOM
1647	534	35203	12	11	275	0:00:24-0:00:25	25	0.05	WT		4.25056	4.25057	0.05WT	25	0.101265329	0.093683752	4	0	4 WT
1648	536	35335	12	13	277	0:00:24-0:00:25	25	0	HOM		2.14812	2.14812	0.0-HOM	25	2.190753714	1.252251081	4	0	4 HOM
1649	538	35467	12	15	279	0:00:24-0:00:25	25	0	HET		1.36496	1.36497	0.0-HET	25	2.899242857	1.146707061	4	0	4 HET
1650	539	35533	12	16	280	0:00:24-0:00:25	25	0	HOM		6.62063	6.62066	0.0-HOM	25	0	0	4	1	4 HOM
1651	540	35599	12	18	282	0:00:24-0:00:25	25	0	HET		0	-	0.0-HET	25	0	0	4	0	4 HET
1652	541	35665	12	19	283	0:00:24-0:00:25	25	0.5	HOM		0.390159	0.39016	0.5HOM	25	0.772220429	0.986281066	4	0	4 HOM
1653	543	35797	12	21	285	0:00:24-0:00:25	25	0.5	HET		1.40293	1.40294	0.5HET	25	0.968227486	1.379589195	4	0	4 HET
1654	544	35863	12	22	286	0:00:24-0:00:25	25	0.5	HOM		0.793401	0.793405	0.5HOM	25	1.267766571	0.899674818	4	0	4 HOM
1655	545	35929	12	23	287	0:00:24-0:00:25	25	0.5	WT		4.9099	4.90991	0.5WT	25	4.199212857	1.129832637	4	1	4 WT
1656	546	35995	12	24	288	0:00:24-0:00:25	25	0.5	HET		0	-	0.5HET	25	0.240444286	0.194609688	4	0	4 HET
1657	1	28	1	1	1	0:00:27-0:00:28	28	0	WT	12:49.0	1.55462	1.55462	0.0-WT	28	1.180561286	1.135888549	5	0	5 WT
1658	2	94	1	2	2	0:00:27-0:00:28	28	0	HET	12:49.0	1.52834	1.52835	0.0-HET	28	2.011318286	0.970482169	5	0	5 HET
1659	3	160	1	3	3	0:00:27-0:00:28	28	0	HOM	12:49.0	2.95197	2.95198	0.0-HOM	28	2.889595714	0.904587765	5	0	5 HOM
1660	4	226	1	4	4	0:00:27-0:00:28	28	0	WT	12:49.0	6.71839	6.71842	0.0-WT	28	2.368274	1.168113455	5	1	5 WT
1661	5	292	1	6	6	0:00:27-0:00:28	28	0	HOM	12:49.0	4.21365	4.21367	0.0-HOM	28	0.013573627	0.035871086	5	0	5 HOM
1662	7	424	1	8	8	0:00:27-0:00:28	28	0.05	HET	12:49.0	4.97296	4.97298	0.05HET	28	0.647693429	0.44453187	5	1	5 HET
1663	9	556	1	10	10	0:00:27-0:00:28	28	0.05	WT	12:49.0	1.80054	1.80055	0.05WT	28	2.577101429	1.153030511	5	0	5 WT
1664	10	622	1	11	11	0:00:27-0:00:28	28	0.05	HET	12:49.0	2.29394	2.29395	0.05HET	28	2.877030143	2.307565872	5	0	5 HET
1665	11	688	1	12	12	0:00:27-0:00:28	28	0.05	HOM	12:49.0	2.27584	2.27584	0.05HOM	28	1.740242286	0.652992436	5	0	5 HOM
1666	12	754	1	13	13	0:00:27-0:00:28	28	0.1	WT	12:49.0	7.1711	7.17113	0.1WT	28	2.032282429	1.084776067	5	1	5 WT
1667	13	820	1	14	14	0:00:27-0:00:28	28	0.1	HET	12:49.0	4.30863	4.30865	0.1HET	28	2.210420857	0.995603805	5	0	5 HET
1668	14	886	1	15	15	0:00:27-0:00:28	28	0.1	HOM	12:49.0	2.07198	2.07199	0.1HOM	28	1.667926914	1.106488132	5	0	5 HOM
1669	15	952	1	16	16	0:00:27-0:00:28	28	0.1	WT	12:49.0	0.206028	0.206029	0.1WT	28	0.381698357	0.470994943	5	0	5 WT
1670	16	1018	1	17	17	0:00:27-0:00:28	28	0.1	HET	12:49.0	1.08477	1.08478	0.1HET	28	1.353618571	0.737939176	5	0	5 HET
1671	17	1084	1	18	18	0:00:27-0:00:28	28	0.1	HOM	12:49.0	2.90602	2.90603	0.1HOM	28	0.914573143	0.657132531	5	0	5 HOM
1672	18	1150	1	19	19	0:00:27-0:00:28	28	0.5	WT	12:49.0	5.98172	5.98174	0.5WT	28	1.497794143	0.873332404	5	1	5 WT
1673	19	1216	1	20	20	0:00:27-0:00:28	28	0.5	HET	12:49.0	0.546878	0.546881	0.5HET	28	0.208540143	0.04954608	5	0	5 HET
1674	20	1282	1	21	21	0:00:27-0:00:28	28	0.5	HOM	12:49.0	3.28548	3.28549	0.5HOM	28	0.297336857	0.315797242	5	0	5 HOM
1675	21	1348	1	22	22	0:00:27-0:00:28	28	0.5	WT	12:49.0	2.65968	2.65968	0.5WT	28	1.779207571	1.952981837	5	0	5 WT
1676	22	1414	1	23	23	0:00:27-0:00:28	28	0.5	HET	12:49.0	8.68108	8.68111	0.5HET	28	2.606451429	1.22774317	5	1	5 HET
1677	23	1480	1	24	24	0:00:27-0:00:28	28	0.5	HOM	12:49.0	0.416647	0.41665	0.5HOM	28	0.349793143	0.123948779	5	0	5 HOM
1678	24	1546	2	1	25	0:00:27-0:00:28	28	0.5	HOM	12:51.0	5.10235	5.10238	0.5HOM	28	1.437309	1.019745158	5	1	5 HOM
1679	25	1612	2	2	26	0:00:27-0:00:28	28	0.5	HET	12:51.0	3.67134	3.67135	0.5HET	28	1.794850429	1.162152569	5	0	5 HET
1680	28	1810	2	5	29	0:00:27-0:00:28	28	0.5	HET	12:51.0	1.12337	1.12337	0.5HET	28	2.3201377	2.988938233	5	0	5 HET
1681	29	1876	2	6	30	0:00:27-0:00:28	28	0.5	WT	12:51.0	6.1961	6.19613	0.5WT	28	1.042406286	1.605198035	5	1	5 WT
1682	30	1942	2	7	31	0:00:27-0:00:28	28	0.1	HOM	12:51.0	1.77308	1.77309	0.1HOM	28	1.173173714	0.403128626	5	0	5 HOM
1683	31	2008	2	8	32	0:00:27-0:00:28	28	0.1	HET	12:51.0	3.96801	3.96802	0.1HET	28	3.233362857	1.347631451	5	0	5 HET
1684	32	2074	2	9	33	0:00:27-0:00:28	28	0.1	WT	12:51.0	0.454684	0.454687	0.1WT	28	1.721631	1.617305806	5	0	5 WT
1685	33	2140	2	10	34	0:00:27-0:00:28	28	0.1	HOM	12:51.0	7.74756	7.74759	0.1HOM	28	2.229919857	1.023574587	5	1	5 HOM
1686	34	2206	2	11	35	0:00:27-0:00:28	28	0.1	HET	12:51.0	2.68417	2.68418	0.1HET	28	0.300534571	0.066941886	5	0	5 HET
1687	35	2272	2	12	36	0:00:27-0:00:28	28	0.1	WT	12:51.0	5.17371	5.17372	0.1WT	28	1.923331571	1.26464084	5	1	5 WT
1688	37	2404	2	14	38	0:00:27-0:00:28	28	0.05	HET	12:51.0	7.33637	7.3364	0.05HET	28	2.290424429	1.351957642	5	1	5 HET
1689	39	2536	2	16	40	0:00:27-0:00:28	28	0.05	HOM	12:51.0	2.17574	2.17576	0.05HOM	28	3.029794286	1.322979054	5	0	5 HOM
1690	40	2602	2	17	41	0:00:27-0:00:28	28	0.05	HET	12:51.0	2.75493	2.75494	0.05HET	28	2.539301429	0.756876461	5	0	5 HET
1691	41	2668	2	18	42	0:00:27-0:00:28	28	0.05	WT	12:51.0	5.86337	5.86339	0.05WT	28	3.043902857	2.094220958	5	1	5 WT
1692	42	2734	2	19	43	0:00:27-0:00:28	28	0	HOM	12:51.0	0.416538	0.416539	0.0-HOM	28	0.703719	1.693157901	5	0	5 HOM
1693	44	2866	2	21	45	0:00:27-0:00:28	28	0	WT	12:51.0	2.35081	2.35082	0.0-WT	28	0.2453313	0.130157665	5	0	5 WT
1694	45	2932	2	22	46	0:00:27-0:00:28	28	0	HOM	12:51.0	0.154924	0.154924	0.0-HOM	28	4.174741429	2.660700231	5	0	5 HOM
1695	46	2998	2	23	47	0:00:27-0:00:28	28	0	HET	12:51.0	8.83789	8.83793	0.0-HET	28	0.044198253	0.05314635	5	1	5 HET
1696	47	3064	2	24	48	0:00:27-0:00:28	28	0	WT	12:51.0	6.44096	6.44099	0.0-WT	28	1.371783857	0.542303383	5	1	5 WT
1697	48	3130	3	2	50	0:00:27-0:00:28	28	0.05	HOM	12:53.0	6.22832	6.22834	0.05HOM	28	4.12366	1.869821986	5	1	5 HOM
1698	49	3196	3	3	51	0:00:27-0:00:28	28	0.05	WT	12:53.0	2.46347	2.46348	0.05WT	28	1.020839714	0.57873795	5	0	5 WT
1699	52	3394	3	6	54	0:00:27-0:00:28	28	0.05	WT	12:53.0	4.85182	4.85185	0.05WT	28	1.159357	0.385291578	5	1	5 WT
1700	54	3526	3	8	56	0:00:27-0:00:28	28	0	HOM	12:53.0	7.08439	7.08442	0.0-HOM	28	3.553782857	1.049053809	5	1	5 HOM
1701	55	3592	3	9	57	0:00:27-0:00:28	28	0	WT	12:53.0	5.12431	5.12433	0.0-WT	28	1.986372	1.224975965	5	1	5 WT
1702	56	3658	3	10	58	0:00:27-0:00:28	28	0	HET	12:53.0	0.608495	0.608499	0.0-HET	28	0.720728714	1.027707677	5	0	5 HET
1703	57	3724	3	11	59	0:00:27-0:00:28	28	0	HOM	12:53.0	1.40292	1.40292	0.0-HOM	28	1.423637	0.765596929	5	0	5 HOM
1704	58	3790	3	12	60	0:00:27-0:00:28	28	0	WT	12:53.0	3.16987	3.16988	0.0-WT	28	0.740175714	1.055826303	5	0	5 WT
1705	59	3856	3	13	61	0:00:27-0:00:28	28	0.5	HET	12:53.0	7.01696	7.01698	0.5HET	28	0.641043714	0.261813274	5	1	5 HET
1706	60	3922	3	14	62	0:00:27-0:00:28	28	0.5	HOM	12:53.0	5.52014	5.52017	0.5HOM	28	2.810754286	1.239577453	5	1	5 HOM
1707	61	3988	3	15	63	0:00:27-0:00:28	28	0.5	WT	12:53.0	5.15188	5.1519	0.5WT	28	2.64463	1.196078924	5	1	5 WT
1708	62	4054	3	16	64	0:00:27-0:00:28	28	0.5	HET	12:53.0	6.5401	6.54012	0.5HET	28	0.471522143	0.308495034	5	1	5 HET
1709	63	4120	3	17	65	0:00:27-0:00:28	28	0.5	HOM	12:53.0	8.40241	8.40244	0.5HOM	28	2.187195857	1.331574952	5	1	5 HOM
1710	64	4186	3	18	66	0:00:27-0:00:28	28	0.5	WT	12:53.0	3.06707	3.06709	0.5WT	28	2.303509286	0.891623508	5	0	5 WT
1711	65	4252	3	19	67	0:00:27-0:00:28	28	0.1	HET	12:53.0	4.43916	4.43918	0.1HET	28	1.151475286	0.751492317	5	0	5 HET
1712	66	4318	3	20	68	0:00:27-0:00:28	28	0.1	HOM	12:53.0	4.01409	4.0141	0.1HOM	28	2.768492857	1.01899573	5	0	5 HOM
1713	67	4384	3	21	69	0:00:27-0:00:28	28	0.1	WT	12:53.0	6.60678	6.6068	0.1WT	28	1.072808029	0.562184755	5	1	5 WT
1714	68	4450	3	22	70	0:00:27-0:00:28	28	0.1	HET	12:53.0	6.86687	6.86689	0.1HET	28	0.227902286	0.060786418	5	1	5 HET
1715	69	4516	3	23	71	0:00:27-0:00:28	28	0.1	HOM	12:53.0	0.305092	0.305094	0.1HOM	28	3.34447	0.908484292	5	0	5 HOM
1716	71	4648	4	1	73	0:00:27-0:00:28	28	0.1	HOM	12:54.0	0.515975	0.515979	0.1HOM	28	1.239805286	0.81827793	5	0	5 HOM
1717	72	4714	4	2	74	0:00:27-0:00:28	28	0.1	WT	12:54.0	4.99227	4.99229	0.1WT	28	2.987192857	0.904824624	5	1	5 WT
1718	74	4846	4	4	76	0:00:27-0:00:28	28	0.1	HOM	12:54.0	5.0345	5.03452	0.1HOM	28	3.209058571	1.269733628	5	1	5 HOM
1719	76	4978	4	6	78	0:00:27-0:00:28	28	0.1	HET	12:54.0	4.48418	4.4842	0.1HET	28	0	0	5	0	5 HET
1720	77	5044	4	7	79	0:00:27-0:00:28	28	0.05	HOM	12:54.0	2.14996	2.14996	0.05HOM	28	2.538768	1.595403351	5	0	5 HOM
1721	83	5440	4	13	85	0:00:27-0:00:28	28	0	HOM	12:54.0	3.37656	3.37658	0.0-HOM	28	2.564042	1.406434787	5	0	5 HOM
1722	84	5506	4	14	86	0:00:27-0:00:28	28	0	WT	12:54.0	2.79379	2.7938	0.0-WT	28	1.277219143	0.967451176	5	0	5 WT
1723	86	5638	4	16	88	0:00:27-0:00:28	28	0	HOM	12:54.0	2.20617	2.20618	0.0-HOM	28	1.896747857	0.870392183	5	0	5 HOM
1724	87	5704	4	17	89	0:00:27-0:00:28	28	0	WT	12:54.0	5.3082	5.30822	0.0-WT	28	2.189688571	0.744186359	5	1	5 WT
1725	88	5770	4	18	90	0:00:27-0:00:28	28	0	HET	12:54.0	4.58262	4.58264	0.0-HET	28	2.721048571	1.249914543	5	0	5 HET
1726	89	5836	4	19	91	0:00:27-0:00:28	28	0.5	HOM	12:54.0	0.767668	0.767671	0.5HOM	28	4.468614286	1.607349606	5	0	5 HOM
1727	90	5902	4	20	92	0:00:27-0:00:28	28	0.5	WT	12:54.0	2.12443	2.12444	0.5WT	28	1.322670429	0.693460368	5	0	5 WT
1728	91	5968	4	21	93	0:00:27-0:00:28	28	0.5	HET	12:54.0	7.08148	7.0815	0.5HET	28	1.736251	0.736099733	5	1	5 HET
1729	92	6034	4	22	94	0:00:27-0:00:28	28	0.5	HOM	12:54.0	1.56355	1.56356	0.5HOM	28	1.891154	1.162973448	5	0	5 HOM
1730	93	6100	4	23	95	0:00:27-0:00:28	28	0.5	WT	12:54.0	3.39104	3.39106	0.5WT	28	1.593217571	1.635678836	5	0	5 WT
1731	94	6166	5	1	97	0:00:27-0:00:28	28	0	WT	12:56.0	9.27611	9.27614	0.0-WT	28	1.716623857	0.652471014	5	1	5 WT
1732	96	6298	5	3	99	0:00:27-0:00:28	28	0	HOM	12:56.0	4.22625	4.22627	0.0-HOM	28	3.645612857	1.155423266	5	0	5 HOM
1733	97	6364	5	4	100	0:00:27-0:00:28	28	0	WT	12:56.0	1.09908	1.09909	0.0-WT	28	2.620526857	2.176612002	5	0	5 WT
1734	98	6430	5	5	101	0:00:27-0:00:28	28	0	HET	12:56.0	1.44058	1.44058	0.0-HET	28	2.833251429	1.011953987	5	0	5 HET
1735	99	6496	5	6	102	0:00:27-0:00:28	28	0	HOM	12:56.0	1.8526	1.8526	0.0-HOM	28	1.614774571	0.634151218	5	0	5 HOM
1736	100	6562	5	7	103	0:00:27-0:00:28	28	0.05	WT	12:56.0	4.72949	4.72951	0.05WT	28	1.468153	1.278960247	5	1	5 WT
1737	101	6628	5	8	104	0:00:27-0:00:28	28	0.05	HET	12:56.0	0.965516	0.965519	0.05HET	28	2.773088571	0.84732286	5	0	5 HET
1738	102	6694	5	9	105	0:00:27-0:00:28	28	0.05	HOM	12:56.0	1.53257	1.53258	0.05HOM	28	0.521379143	0.04503448	5	0	5 HOM
1739	103	6760	5	10	106	0:00:27-0:00:28	28	0.05	WT	12:56.0	2.36705	2.36706	0.05WT	28	1.632159	1.227781197	5	0	5 WT
1740	104	6826	5	11	107	0:00:27-0:00:28	28	0.05	HET	12:56.0	4.7806	4.78062	0.05HET	28	1.499028857	0.825314053	5	1	5 HET
1741	105	6892	5	12	108	0:00:27-0:00:28	28	0.05	HOM	12:56.0	9.88378	9.88382	0.05HOM	28	2.040175429	1.276707416	5	1	5 HOM
1742	106	6958	5	13	109	0:00:27-0:00:28	28	0.1	WT	12:56.0	4.58393	4.58395	0.1WT	28	0.516920286	0.803320354	5	0	5 WT
1743	107	7024	5	14	110	0:00:27-0:00:28	28	0.1	HET	12:56.0	6.43706	6.43708	0.1HET	28	2.105871429	0.678338778	5	1	5 HET
1744	109	7156	5	16	112	0:00:27-0:00:28	28	0.1	WT	12:56.0	7.5959	7.59594	0.1WT	28	1.610134143	0.640268018	5	1	5 WT
1745	110	7222	5	17	113	0:00:27-0:00:28	28	0.1	HET	12:56.0	5.57889	5.57891	0.1HET	28	2.140899857	1.165151366	5	1	5 HET
1746	111	7288	5	18	114	0:00:27-0:00:28	28	0.1	HOM	12:56.0	0.281506	0.281508	0.1HOM	28	0.853213329	1.085359375	5	0	5 HOM
1747	112	7354	5	19	115	0:00:27-0:00:28	28	0.5	WT	12:56.0	6.9689	6.96893	0.5WT	28	1.074989857	0.83624439	5	1	5 WT
1748	113	7420	5	20	116	0:00:27-0:00:28	28	0.5	HET	12:56.0	4.63515	4.63517	0.5HET	28	1.219901143	1.093669556	5	1	5 HET
1749	114	7486	5	21	117	0:00:27-0:00:28	28	0.5	HOM	12:56.0	4.27809	4.27811	0.5HOM	28	2.332858857	1.804969231	5	0	5 HOM
1750	115	7552	5	22	118	0:00:27-0:00:28	28	0.5	WT	12:56.0	4.21927	4.21929	0.5WT	28	1.255830857	0.712211479	5	0	5 WT
1751	116	7618	5	23	119	0:00:27-0:00:28	28	0.5	HET	12:56.0	4.66466	4.66468	0.5HET	28	1.853874143	0.699755011	5	1	5 HET
1752	117	7684	5	24	120	0:00:27-0:00:28	28	0.5	HOM	12:56.0	2.43041	2.43042	0.5HOM	28	2.094971714	1.095230673	5	0	5 HOM
1753	119	7816	6	2	122	0:00:27-0:00:28	28	0.5	HET	12:57.0	2.8423	2.84231	0.5HET	28	2.626486429	1.298223294	5	0	5 HET
1754	120	7882	6	3	123	0:00:27-0:00:28	28	0.5	WT	12:57.0	6.00045	6.00047	0.5WT	28	2.567537143	1.160752961	5	1	5 WT
1755	121	7948	6	4	124	0:00:27-0:00:28	28	0.5	HOM	12:57.0	0.241702	0.241703	0.5HOM	28	0.112247029	0.051276989	5	0	5 HOM
1756	122	8014	6	5	125	0:00:27-0:00:28	28	0.5	HET	12:57.0	3.04184	3.04185	0.5HET	28	0.785613857	0.698682185	5	0	5 HET
1757	123	8080	6	6	126	0:00:27-0:00:28	28	0.5	WT	12:57.0	0.0700351	0.0700355	0.5WT	28	2.401295143	1.220302752	5	0	5 WT
1758	125	8212	6	8	128	0:00:27-0:00:28	28	0.1	HET	12:57.0	4.02889	4.0289	0.1HET	28	1.948756857	1.208198692	5	0	5 HET
1759	126	8278	6	9	129	0:00:27-0:00:28	28	0.1	WT	12:57.0	1.92499	1.925	0.1WT	28	0.889315614	0.999745766	5	0	5 WT
1760	127	8344	6	10	130	0:00:27-0:00:28	28	0.1	HOM	12:57.0	0.601174	0.601176	0.1HOM	28	0	0	5	0	5 HOM
1761	128	8410	6	11	131	0:00:27-0:00:28	28	0.1	HET	12:57.0	6.29262	6.29264	0.1HET	28	1.860198429	1.773097568	5	1	5 HET
1762	129	8476	6	12	132	0:00:27-0:00:28	28	0.1	WT	12:57.0	6.87175	6.87178	0.1WT	28	2.448341143	1.392994021	5	1	5 WT
1763	130	8542	6	13	133	0:00:27-0:00:28	28	0.05	HOM	12:57.0	4.29357	4.29358	0.05HOM	28	2.905667429	2.234423083	5	0	5 HOM
1764	131	8608	6	14	134	0:00:27-0:00:28	28	0.05	HET	12:57.0	2.05398	2.05399	0.05HET	28	1.656211857	0.83480597	5	0	5 HET
1765	132	8674	6	15	135	0:00:27-0:00:28	28	0.05	WT	12:57.0	0.433002	0.433004	0.05WT	28	1.138593143	0.722972032	5	0	5 WT
1766	134	8806	6	17	137	0:00:27-0:00:28	28	0.05	HET	12:57.0	3.18456	3.18457	0.05HET	28	1.554092	1.688855217	5	0	5 HET
1767	135	8872	6	18	138	0:00:27-0:00:28	28	0.05	WT	12:57.0	4.25409	4.25411	0.05WT	28	0.647834571	0.475049033	5	0	5 WT
1768	137	9004	6	20	140	0:00:27-0:00:28	28	0	HET	12:57.0	5.00492	5.00494	0.0-HET	28	1.231204429	0.633436139	5	1	5 HET
1769	139	9136	6	22	142	0:00:27-0:00:28	28	0	HOM	12:57.0	0.146192	0.146192	0.0-HOM	28	0.207687757	0.114345154	5	0	5 HOM
1770	140	9202	6	23	143	0:00:27-0:00:28	28	0	HET	12:57.0	0.341632	0.341634	0.0-HET	28	0.375648571	0.323850098	5	0	5 HET
1771	141	9268	7	1	145	0:00:27-0:00:28	28	0.05	HET	12:58.0	8.19808	8.19812	0.05HET	28	2.978892857	1.929675987	5	1	5 HET
1772	144	9466	7	4	148	0:00:27-0:00:28	28	0.05	HET	12:58.0	0.0787711	0.0787713	0.05HET	28	0	0	5	0	5 HET
1773	145	9532	7	5	149	0:00:27-0:00:28	28	0.05	HOM	12:58.0	5.33322	5.33324	0.05HOM	28	3.878628571	1.449574306	5	1	5 HOM
1774	146	9598	7	6	150	0:00:27-0:00:28	28	0.05	WT	12:58.0	2.96113	2.96114	0.05WT	28	2.184584286	0.975753038	5	0	5 WT
1775	149	9796	7	10	154	0:00:27-0:00:28	28	0	HET	12:58.0	6.18592	6.18595	0.0-HET	28	0.285575571	0.431816887	5	1	5 HET
1776	150	9862	7	14	158	0:00:27-0:00:28	28	0.5	HOM	12:58.0	0.672156	0.672158	0.5HOM	28	2.723723571	1.210933561	5	0	5 HOM
1777	151	9928	7	15	159	0:00:27-0:00:28	28	0.5	WT	12:58.0	0.234771	0.234773	0.5WT	28	1.880752	1.51448201	5	0	5 WT
1778	152	9994	7	16	160	0:00:27-0:00:28	28	0.5	HET	12:58.0	8.65513	8.65517	0.5HET	28	2.221199	1.880551301	5	1	5 HET
1779	153	10060	7	17	161	0:00:27-0:00:28	28	0.5	HOM	12:58.0	3.78823	3.78824	0.5HOM	28	4.51535	1.332800125	5	0	5 HOM
1780	156	10258	7	20	164	0:00:27-0:00:28	28	0.1	HOM	12:58.0	4.9017	4.90172	0.1HOM	28	3.903469857	4.587065004	5	1	5 HOM
1781	157	10324	7	21	165	0:00:27-0:00:28	28	0.1	WT	12:58.0	2.47034	2.47035	0.1WT	28	2.886608714	2.935351973	5	0	5 WT
1782	158	10390	7	22	166	0:00:27-0:00:28	28	0.1	HET	12:58.0	1.69543	1.69543	0.1HET	28	1.800143286	2.223983673	5	0	5 HET
1783	159	10456	7	23	167	0:00:27-0:00:28	28	0.1	HOM	12:58.0	0.877709	0.877712	0.1HOM	28	1.021409429	1.071840721	5	0	5 HOM
1784	160	10522	8	1	169	0:00:27-0:00:28	28	0.1	HOM	12:59.0	2.19331	2.19332	0.1HOM	28	1.593846714	0.846523033	5	0	5 HOM
1785	161	10588	8	2	170	0:00:27-0:00:28	28	0.1	WT	12:59.0	2.26843	2.26844	0.1WT	28	0.109340143	0.289286826	5	0	5 WT
1786	162	10654	8	3	171	0:00:27-0:00:28	28	0.1	HET	12:59.0	3.54328	3.54329	0.1HET	28	0.650460286	0.761144844	5	0	5 HET
1787	163	10720	8	4	172	0:00:27-0:00:28	28	0.1	HOM	12:59.0	2.27489	2.2749	0.1HOM	28	2.855192714	1.342471596	5	0	5 HOM
1788	165	10852	8	6	174	0:00:27-0:00:28	28	0.1	HET	12:59.0	3.32291	3.32292	0.1HET	28	0.949679357	0.80002752	5	0	5 HET
1789	166	10918	8	7	175	0:00:27-0:00:28	28	0.05	HOM	12:59.0	3.99014	3.99016	0.05HOM	28	0.897638971	0.799453368	5	0	5 HOM
1790	167	10984	8	8	176	0:00:27-0:00:28	28	0.05	WT	12:59.0	2.7133	2.71331	0.05WT	28	2.116546286	1.467558586	5	0	5 WT
1791	168	11050	8	9	177	0:00:27-0:00:28	28	0.05	HET	12:59.0	4.35182	4.35183	0.05HET	28	0.316620429	0.223434385	5	0	5 HET
1792	169	11116	8	10	178	0:00:27-0:00:28	28	0.05	HOM	12:59.0	3.73339	3.7334	0.05HOM	28	1.503959286	1.005175263	5	0	5 HOM
1793	170	11182	8	11	179	0:00:27-0:00:28	28	0.05	WT	12:59.0	7.27024	7.27028	0.05WT	28	2.57616	1.577066033	5	1	5 WT
1794	171	11248	8	12	180	0:00:27-0:00:28	28	0.05	HET	12:59.0	5.91426	5.91428	0.05HET	28	1.980208571	0.743320723	5	1	5 HET
1795	172	11314	8	13	181	0:00:27-0:00:28	28	0	HOM	12:59.0	5.35075	5.35077	0.0-HOM	28	3.778705714	1.633009605	5	1	5 HOM
1796	173	11380	8	14	182	0:00:27-0:00:28	28	0	WT	12:59.0	5.75719	5.75721	0.0-WT	28	1.225098857	0.944735915	5	1	5 WT
1797	174	11446	8	15	183	0:00:27-0:00:28	28	0	HET	12:59.0	0.0735625	0.073563	0.0-HET	28	2.904332286	2.629738354	5	0	5 HET
1798	175	11512	8	16	184	0:00:27-0:00:28	28	0	HOM	12:59.0	4.83815	4.83817	0.0-HOM	28	2.340171429	1.221215019	5	1	5 HOM
1799	176	11578	8	17	185	0:00:27-0:00:28	28	0	WT	12:59.0	3.65109	3.65111	0.0-WT	28	1.336164	0.994194907	5	0	5 WT
1800	177	11644	8	19	187	0:00:27-0:00:28	28	0.5	HOM	12:59.0	0.153702	0.153702	0.5HOM	28	0	0	5	0	5 HOM
1801	178	11710	8	20	188	0:00:27-0:00:28	28	0.5	WT	12:59.0	5.34848	5.3485	0.5WT	28	2.919832857	0.713807585	5	1	5 WT
1802	179	11776	8	21	189	0:00:27-0:00:28	28	0.5	HET	12:59.0	0.653892	0.653895	0.5HET	28	0.132793171	0.023910874	5	0	5 HET
1803	181	11908	8	23	191	0:00:27-0:00:28	28	0.5	WT	12:59.0	4.18822	4.18824	0.5WT	28	2.243468714	2.029499897	5	0	5 WT
1804	182	11974	8	24	192	0:00:27-0:00:28	28	0.5	HET	12:59.0	3.59904	3.59905	0.5HET	28	0.127662129	0.067692967	5	0	5 HET
1805	186	12238	9	4	196	0:00:27-0:00:28	28	0	WT	13:00.0	0.218642	0.218642	0.0-WT	28	0.955870286	0.773719706	5	0	5 WT
1806	187	12304	9	5	197	0:00:27-0:00:28	28	0	HET	13:00.0	8.01483	8.01486	0.0-HET	28	1.379209714	0.955976944	5	1	5 HET
1807	188	12370	9	6	198	0:00:27-0:00:28	28	0	HOM	13:00.0	9.06878	9.06882	0.0-HOM	28	0.175336	0.256626328	5	1	5 HOM
1808	189	12436	9	7	199	0:00:27-0:00:28	28	0.05	WT	13:00.0	5.70949	5.70951	0.05WT	28	2.667998571	1.064283782	5	1	5 WT
1809	190	12502	9	8	200	0:00:27-0:00:28	28	0.05	HET	13:00.0	1.16267	1.16267	0.05HET	28	1.921692714	1.718362006	5	0	5 HET
1810	191	12568	9	10	202	0:00:27-0:00:28	28	0.05	WT	13:00.0	9.25987	9.25991	0.05WT	28	3.557647143	1.465747329	5	1	5 WT
1811	192	12634	9	11	203	0:00:27-0:00:28	28	0.05	HET	13:00.0	4.36066	4.36068	0.05HET	28	0.203747286	0.063253295	5	0	5 HET
1812	193	12700	9	12	204	0:00:27-0:00:28	28	0.05	HOM	13:00.0	0.234095	0.234098	0.05HOM	28	2.032254	1.269137455	5	0	5 HOM
1813	194	12766	9	13	205	0:00:27-0:00:28	28	0.1	WT	13:00.0	8.78218	8.78222	0.1WT	28	1.968111	1.479421564	5	1	5 WT
1814	195	12832	9	14	206	0:00:27-0:00:28	28	0.1	HET	13:00.0	7.31896	7.31899	0.1HET	28	1.529421857	0.500326591	5	1	5 HET
1815	196	12898	9	15	207	0:00:27-0:00:28	28	0.1	HOM	13:00.0	6.84623	6.84626	0.1HOM	28	4.94337	1.195306503	5	1	5 HOM
1816	197	12964	9	16	208	0:00:27-0:00:28	28	0.1	WT	13:00.0	4.24969	4.2497	0.1WT	28	1.411252143	0.769107686	5	0	5 WT
1817	198	13030	9	17	209	0:00:27-0:00:28	28	0.1	HET	13:00.0	4.54955	4.54957	0.1HET	28	1.98885	0.747318271	5	0	5 HET
1818	199	13096	9	18	210	0:00:27-0:00:28	28	0.1	HOM	13:00.0	7.52213	7.52216	0.1HOM	28	1.219181014	0.832128407	5	1	5 HOM
1819	200	13162	9	19	211	0:00:27-0:00:28	28	0.5	WT	13:00.0	9.59643	9.59646	0.5WT	28	1.003829857	0.136115708	5	1	5 WT
1820	202	13294	9	21	213	0:00:27-0:00:28	28	0.5	HOM	13:00.0	0.126588	0.126588	0.5HOM	28	0	0	5	0	5 HOM
1821	204	13426	9	23	215	0:00:27-0:00:28	28	0.5	HET	13:00.0	5.08958	5.0896	0.5HET	28	2.115048	0.958390913	5	1	5 HET
1822	205	13492	9	24	216	0:00:27-0:00:28	28	0.5	HOM	13:00.0	3.08632	3.08633	0.5HOM	28	3.720442857	1.330477756	5	0	5 HOM
1823	208	13690	10	3	219	0:00:27-0:00:28	28	0.5	WT	13:01.0	4.2756	4.27562	0.5WT	28	0.209971286	0.037172714	5	0	5 WT
1824	210	13822	10	5	221	0:00:27-0:00:28	28	0.5	HET	13:01.0	3.47716	3.47717	0.5HET	28	1.844090857	0.983350064	5	0	5 HET
1825	211	13888	10	6	222	0:00:27-0:00:28	28	0.5	WT	13:01.0	0.274556	0.274557	0.5WT	28	0	0	5	0	5 WT
1826	213	14020	10	8	224	0:00:27-0:00:28	28	0.1	HET	13:01.0	0.246222	0.246223	0.1HET	28	0.546414714	0.403014291	5	0	5 HET
1827	214	14086	10	9	225	0:00:27-0:00:28	28	0.1	WT	13:01.0	3.74882	3.74884	0.1WT	28	2.584802857	1.428263162	5	0	5 WT
1828	215	14152	10	10	226	0:00:27-0:00:28	28	0.1	HOM	13:01.0	5.60512	5.60514	0.1HOM	28	2.879014357	4.5680578	5	1	5 HOM
1829	217	14284	10	12	228	0:00:27-0:00:28	28	0.1	WT	13:01.0	5.4986	5.49863	0.1WT	28	1.961622143	1.97381419	5	1	5 WT
1830	219	14416	10	14	230	0:00:27-0:00:28	28	0.05	HET	13:01.0	7.31283	7.31286	0.05HET	28	2.604767143	0.948816529	5	1	5 HET
1831	220	14482	10	15	231	0:00:27-0:00:28	28	0.05	WT	13:01.0	0.68916	0.689163	0.05WT	28	1.750391429	0.571549178	5	0	5 WT
1832	221	14548	10	16	232	0:00:27-0:00:28	28	0.05	HOM	13:01.0	2.1292	2.1292	0.05HOM	28	0.325223686	0.318979473	5	0	5 HOM
1833	222	14614	10	18	234	0:00:27-0:00:28	28	0.05	WT	13:01.0	1.2926	1.2926	0.05WT	28	2.8635	0.992887729	5	0	5 WT
1834	223	14680	10	19	235	0:00:27-0:00:28	28	0	HOM	13:01.0	1.07021	1.07022	0.0-HOM	28	4.060644286	1.778421512	5	0	5 HOM
1835	224	14746	10	20	236	0:00:27-0:00:28	28	0	HET	13:01.0	1.35695	1.35695	0.0-HET	28	0.911720857	0.63114733	5	0	5 HET
1836	225	14812	10	21	237	0:00:27-0:00:28	28	0	WT	13:01.0	4.91563	4.91565	0.0-WT	28	2.444163143	2.074162919	5	1	5 WT
1837	226	14878	10	22	238	0:00:27-0:00:28	28	0	HOM	13:01.0	3.28384	3.28386	0.0-HOM	28	1.955062857	0.990254499	5	0	5 HOM
1838	227	14944	10	23	239	0:00:27-0:00:28	28	0	HET	13:01.0	1.83949	1.83949	0.0-HET	28	1.008678571	0.418522585	5	0	5 HET
1839	228	15010	10	24	240	0:00:27-0:00:28	28	0	WT	13:01.0	1.69214	1.69214	0.0-WT	28	2.173942286	1.789427222	5	0	5 WT
1840	229	15076	11	1	241	0:00:27-0:00:28	28	0.05	HET	13:03.0	3.27999	3.28	0.05HET	28	2.911951286	2.38134668	5	0	5 HET
1841	230	15142	11	2	242	0:00:27-0:00:28	28	0.05	HOM	13:03.0	1.96559	1.9656	0.05HOM	28	0.4094815	0.50135872	5	0	5 HOM
1842	231	15208	11	3	243	0:00:27-0:00:28	28	0.05	WT	13:03.0	5.68523	5.68525	0.05WT	28	1.758758571	1.23806334	5	1	5 WT
1843	232	15274	11	4	244	0:00:27-0:00:28	28	0.05	HET	13:03.0	6.8474	6.84743	0.05HET	28	2.925303143	1.145086292	5	1	5 HET
1844	233	15340	11	5	245	0:00:27-0:00:28	28	0.05	HOM	13:03.0	5.53115	5.53118	0.05HOM	28	1.516169857	1.269282766	5	1	5 HOM
1845	234	15406	11	6	246	0:00:27-0:00:28	28	0.05	WT	13:03.0	0.0332901	0.249679	0.05WT	28	1.171690143	0.540371432	5	0	5 WT
1846	235	15472	11	7	247	0:00:27-0:00:28	28	0	HET	13:03.0	4.21281	4.21283	0.0-HET	28	0.534916443	0.388884892	5	0	5 HET
1847	236	15538	11	8	248	0:00:27-0:00:28	28	0	HOM	13:03.0	0.395205	0.395207	0.0-HOM	28	0.233586243	0.126148153	5	0	5 HOM
1848	237	15604	11	9	249	0:00:27-0:00:28	28	0	WT	13:03.0	0.349664	0.349666	0.0-WT	28	0	0	5	0	5 WT
1849	238	15670	11	10	250	0:00:27-0:00:28	28	0	HET	13:03.0	2.90187	2.90188	0.0-HET	28	1.192299714	1.569545383	5	0	5 HET
1850	239	15736	11	11	251	0:00:27-0:00:28	28	0	HOM	13:03.0	1.31004	1.31004	0.0-HOM	28	4.36581	3.033869983	5	0	5 HOM
1851	240	15802	11	12	252	0:00:27-0:00:28	28	0	WT	13:03.0	5.05496	5.05498	0.0-WT	28	2.863136143	1.808829927	5	1	5 WT
1852	241	15868	11	13	253	0:00:27-0:00:28	28	0.5	HET	13:03.0	0.175046	0.175046	0.5HET	28	0.603621714	0.113609504	5	0	5 HET
1853	243	16000	11	15	255	0:00:27-0:00:28	28	0.5	WT	13:03.0	1.63276	1.63276	0.5WT	28	2.220864286	0.675086586	5	0	5 WT
1854	244	16066	11	16	256	0:00:27-0:00:28	28	0.5	HET	13:03.0	7.23578	7.23582	0.5HET	28	2.40336	1.527346665	5	1	5 HET
1855	245	16132	11	17	257	0:00:27-0:00:28	28	0.5	HOM	13:03.0	3.25964	3.25966	0.5HOM	28	3.940088571	2.473759295	5	0	5 HOM
1856	246	16198	11	18	258	0:00:27-0:00:28	28	0.5	WT	13:03.0	5.99867	5.99869	0.5WT	28	2.534458857	1.562465359	5	1	5 WT
1857	247	16264	11	19	259	0:00:27-0:00:28	28	0.1	HET	13:03.0	1.36655	1.36656	0.1HET	28	1.483819429	0.70327409	5	0	5 HET
1858	249	16396	11	21	261	0:00:27-0:00:28	28	0.1	WT	13:03.0	3.05086	3.05087	0.1WT	28	0.058464801	0.094748498	5	0	5 WT
1859	250	16462	11	22	262	0:00:27-0:00:28	28	0.1	HET	13:03.0	3.97203	3.97205	0.1HET	28	0.906252857	0.794057434	5	0	5 HET
1860	251	16528	11	23	263	0:00:27-0:00:28	28	0.1	HOM	13:03.0	5.01383	5.01385	0.1HOM	28	1.382247857	0.297391816	5	1	5 HOM
1861	252	16594	11	24	264	0:00:27-0:00:28	28	0.1	WT	13:03.0	3.3946	3.39462	0.1WT	28	1.829352286	1.141634119	5	0	5 WT
1862	253	16660	12	1	265	0:00:27-0:00:28	28	0.1	HOM	13:03.0	4.76869	4.76871	0.1HOM	28	2.392802857	0.634858216	5	1	5 HOM
1863	254	16726	12	2	266	0:00:27-0:00:28	28	0.1	WT	13:03.0	4.12446	4.12448	0.1WT	28	3.945447143	2.654153763	5	0	5 WT
1864	255	16792	12	3	267	0:00:27-0:00:28	28	0.1	HET	13:03.0	2.58014	2.58015	0.1HET	28	1.208657714	0.720422302	5	0	5 HET
1865	258	16990	12	6	270	0:00:27-0:00:28	28	0.1	HET	13:03.0	1.88273	1.88273	0.1HET	28	1.375691714	1.322622114	5	0	5 HET
1866	260	17122	12	8	272	0:00:27-0:00:28	28	0.05	WT	13:03.0	3.42993	3.42995	0.05WT	28	2.837144286	0.901900947	5	0	5 WT
1867	261	17188	12	9	273	0:00:27-0:00:28	28	0.05	HET	13:03.0	4.03108	4.0311	0.05HET	28	1.754498	1.683756845	5	0	5 HET
1868	262	17254	12	11	275	0:00:27-0:00:28	28	0.05	WT	13:03.0	1.90697	1.90698	0.05WT	28	1.868566571	2.240733401	5	0	5 WT
1869	264	17386	12	13	277	0:00:27-0:00:28	28	0	HOM	13:03.0	9.26064	9.26067	0.0-HOM	28	2.024857857	1.061040349	5	1	5 HOM
1870	265	17452	12	14	278	0:00:27-0:00:28	28	0	WT	13:03.0	0.988816	0.988821	0.0-WT	28	3.012535143	2.027379406	5	0	5 WT
1871	266	17518	12	15	279	0:00:27-0:00:28	28	0	HET	13:03.0	3.41872	3.41873	0.0-HET	28	0.243097857	0.064655057	5	0	5 HET
1872	267	17584	12	16	280	0:00:27-0:00:28	28	0	HOM	13:03.0	6.25508	6.25511	0.0-HOM	28	0.309036571	0.056648521	5	1	5 HOM
1873	268	17650	12	17	281	0:00:27-0:00:28	28	0	WT	13:03.0	4.64513	4.64514	0.0-WT	28	2.733588843	3.15679764	5	1	5 WT
1874	271	17848	12	20	284	0:00:27-0:00:28	28	0.5	WT	13:03.0	0.945665	0.945665	0.5WT	28	2.579924286	0.920888844	5	0	5 WT
1875	272	17914	12	21	285	0:00:27-0:00:28	28	0.5	HET	13:03.0	4.24048	4.24049	0.5HET	28	3.487605714	1.444416381	5	0	5 HET
1876	274	18046	12	23	287	0:00:27-0:00:28	28	0.5	WT	13:03.0	4.60469	4.60471	0.5WT	28	1.560275857	0.86528225	5	1	5 WT
1877	276	18178	1	1	1	0:00:27-0:00:28	28	0	WT	27:35.0	3.43453	3.43454	0.0-WT	28	0.801322781	0.673350202	5	0	5 WT
1878	277	18244	1	2	2	0:00:27-0:00:28	28	0	HET	27:35.0	8.00657	8.0066	0.0-HET	28	0.163810429	0.064965735	5	1	5 HET
1879	278	18310	1	3	3	0:00:27-0:00:28	28	0	HOM	27:35.0	4.64832	4.64834	0.0-HOM	28	2.488771143	1.164110607	5	1	5 HOM
1880	279	18376	1	4	4	0:00:27-0:00:28	28	0	WT	27:35.0	2.20954	2.20955	0.0-WT	28	0.235994971	0.217527265	5	0	5 WT
1881	280	18442	1	5	5	0:00:27-0:00:28	28	0	HET	27:35.0	9.34327	9.34331	0.0-HET	28	0.224115	0.036495489	5	1	5 HET
1882	281	18508	1	6	6	0:00:27-0:00:28	28	0	HOM	27:35.0	0.120282	0.120283	0.0-HOM	28	0.505809371	0.26143492	5	0	5 HOM
1883	282	18574	1	7	7	0:00:27-0:00:28	28	0.05	WT	27:35.0	0	-	0.05WT	28	1.892991	1.198148389	5	0	5 WT
1884	283	18640	1	8	8	0:00:27-0:00:28	28	0.05	HET	27:35.0	3.6982	3.69822	0.05HET	28	2.039051429	1.755701919	5	0	5 HET
1885	285	18772	1	10	10	0:00:27-0:00:28	28	0.05	WT	27:35.0	4.99272	4.99275	0.05WT	28	4.268077143	2.122971174	5	1	5 WT
1886	286	18838	1	11	11	0:00:27-0:00:28	28	0.05	HET	27:35.0	0.136491	0.136492	0.05HET	28	0.301975243	0.146940013	5	0	5 HET
1887	287	18904	1	12	12	0:00:27-0:00:28	28	0.05	HOM	27:35.0	4.55023	4.55025	0.05HOM	28	1.935541286	1.193304716	5	0	5 HOM
1888	292	19234	1	17	17	0:00:27-0:00:28	28	0.1	HET	27:35.0	3.17091	3.17092	0.1HET	28	1.933311429	0.46450913	5	0	5 HET
1889	293	19300	1	18	18	0:00:27-0:00:28	28	0.1	HOM	27:35.0	6.93882	6.93885	0.1HOM	28	1.292337286	0.717589688	5	1	5 HOM
1890	296	19498	1	22	22	0:00:27-0:00:28	28	0.5	WT	27:35.0	0.198546	0.198547	0.5WT	28	0.274021571	0.106959045	5	0	5 WT
1891	298	19630	1	24	24	0:00:27-0:00:28	28	0.5	HOM	27:35.0	1.1364	1.13641	0.5HOM	28	2.740044286	1.10133717	5	0	5 HOM
1892	299	19696	2	1	25	0:00:27-0:00:28	28	0.5	HOM	32:40.0	5.00061	5.00063	0.5HOM	28	1.538928957	1.121068475	5	1	5 HOM
1893	300	19762	2	2	26	0:00:27-0:00:28	28	0.5	HET	32:40.0	5.24094	5.24096	0.5HET	28	3.142895714	1.05853828	5	1	5 HET
1894	301	19828	2	3	27	0:00:27-0:00:28	28	0.5	WT	32:40.0	6.70662	6.70665	0.5WT	28	1.933544286	0.539906297	5	1	5 WT
1895	304	20026	2	6	30	0:00:27-0:00:28	28	0.5	WT	32:40.0	5.90868	5.9087	0.5WT	28	1.760221429	1.50419859	5	1	5 WT
1896	305	20092	2	7	31	0:00:27-0:00:28	28	0.1	HOM	32:40.0	2.66559	2.6656	0.1HOM	28	1.123118143	0.992475164	5	0	5 HOM
1897	306	20158	2	8	32	0:00:27-0:00:28	28	0.1	HET	32:40.0	9.41451	9.41454	0.1HET	28	2.388199714	1.808957235	5	1	5 HET
1898	307	20224	2	9	33	0:00:27-0:00:28	28	0.1	WT	32:40.0	0.111601	0.111601	0.1WT	28	0.077457057	0.018130441	5	0	5 WT
1899	308	20290	2	10	34	0:00:27-0:00:28	28	0.1	HOM	32:40.0	6.67258	6.67261	0.1HOM	28	2.768916429	1.993770189	5	1	5 HOM
1900	310	20422	2	12	36	0:00:27-0:00:28	28	0.1	WT	32:40.0	1.46004	1.46004	0.1WT	28	0.060666271	0.029478073	5	0	5 WT
1901	311	20488	2	13	37	0:00:27-0:00:28	28	0.05	HOM	32:40.0	1.24374	1.24374	0.05HOM	28	2.060246571	1.726436057	5	0	5 HOM
1902	313	20620	2	17	41	0:00:27-0:00:28	28	0.05	HET	32:40.0	1.50409	1.5041	0.05HET	28	0.543101886	0.355257238	5	0	5 HET
1903	314	20686	2	18	42	0:00:27-0:00:28	28	0.05	WT	32:40.0	3.73618	3.73619	0.05WT	28	1.550958286	1.098421085	5	0	5 WT
1904	315	20752	2	19	43	0:00:27-0:00:28	28	0	HOM	32:40.0	2.22752	2.22752	0.0-HOM	28	1.119408286	0.788965624	5	0	5 HOM
1905	316	20818	2	20	44	0:00:27-0:00:28	28	0	HET	32:40.0	7.44909	7.44912	0.0-HET	28	2.934715714	0.639889361	5	1	5 HET
1906	317	20884	2	21	45	0:00:27-0:00:28	28	0	WT	32:40.0	2.98649	2.9865	0.0-WT	28	3.699627143	2.272381261	5	0	5 WT
1907	318	20950	2	22	46	0:00:27-0:00:28	28	0	HOM	32:40.0	1.93437	1.93438	0.0-HOM	28	1.572600714	1.184943005	5	0	5 HOM
1908	319	21016	2	23	47	0:00:27-0:00:28	28	0	HET	32:40.0	7.22756	7.22759	0.0-HET	28	2.357226286	1.315801173	5	1	5 HET
1909	320	21082	2	24	48	0:00:27-0:00:28	28	0	WT	32:40.0	3.51314	3.51315	0.0-WT	28	0	0	5	0	5 WT
1910	322	21214	3	2	50	0:00:27-0:00:28	28	0.05	HOM	34:27.0	0.00946855	0.00946857	0.05HOM	28	0.647376	0.584247193	5	0	5 HOM
1911	323	21280	3	3	51	0:00:27-0:00:28	28	0.05	WT	34:27.0	7.63138	7.63141	0.05WT	28	0.341070286	0.133718853	5	1	5 WT
1912	324	21346	3	4	52	0:00:27-0:00:28	28	0.05	HET	34:27.0	1.74259	1.7426	0.05HET	28	0.706166143	0.242854386	5	0	5 HET
1913	325	21412	3	5	53	0:00:27-0:00:28	28	0.05	HOM	34:27.0	8.11895	8.11898	0.05HOM	28	2.345938143	1.274259289	5	1	5 HOM
1914	327	21544	3	7	55	0:00:27-0:00:28	28	0	HET	34:27.0	5.27221	5.27223	0.0-HET	28	3.617431429	1.614591682	5	1	5 HET
1915	328	21610	3	8	56	0:00:27-0:00:28	28	0	HOM	34:27.0	1.97738	1.97739	0.0-HOM	28	1.570321714	1.186172665	5	0	5 HOM
1916	329	21676	3	9	57	0:00:27-0:00:28	28	0	WT	34:27.0	6.56141	6.56144	0.0-WT	28	1.078725386	0.90602774	5	1	5 WT
1917	331	21808	3	11	59	0:00:27-0:00:28	28	0	HOM	34:27.0	3.61555	3.61557	0.0-HOM	28	1.684990714	0.68590983	5	0	5 HOM
1918	332	21874	3	12	60	0:00:27-0:00:28	28	0	WT	34:27.0	0.24215	0.242151	0.0-WT	28	0.266722586	0.088479771	5	0	5 WT
1919	333	21940	3	13	61	0:00:27-0:00:28	28	0.5	HET	34:27.0	1.1068	1.32817	0.5HET	28	0	0	5	0	5 HET
1920	334	22006	3	14	62	0:00:27-0:00:28	28	0.5	HOM	34:27.0	2.13688	2.13689	0.5HOM	28	3.065151	2.623836642	5	0	5 HOM
1921	335	22072	3	15	63	0:00:27-0:00:28	28	0.5	WT	34:27.0	6.7723	6.77232	0.5WT	28	1.369665714	2.05538301	5	1	5 WT
1922	336	22138	3	16	64	0:00:27-0:00:28	28	0.5	HET	34:27.0	4.55853	4.55855	0.5HET	28	2.412841429	1.000146156	5	0	5 HET
1923	337	22204	3	17	65	0:00:27-0:00:28	28	0.5	HOM	34:27.0	0.423199	0.423199	0.5HOM	28	1.022981286	0.8599461	5	0	5 HOM
1924	339	22336	3	19	67	0:00:27-0:00:28	28	0.1	HET	34:27.0	3.7197	3.71971	0.1HET	28	0.257138	0.374345331	5	0	5 HET
1925	340	22402	3	20	68	0:00:27-0:00:28	28	0.1	HOM	34:27.0	2.43638	2.43639	0.1HOM	28	4.552258571	2.337052578	5	0	5 HOM
1926	341	22468	3	21	69	0:00:27-0:00:28	28	0.1	WT	34:27.0	1.811	1.81101	0.1WT	28	0.408891043	0.400085247	5	0	5 WT
1927	342	22534	3	22	70	0:00:27-0:00:28	28	0.1	HET	34:27.0	3.08248	3.0825	0.1HET	28	3.091085286	1.921785279	5	0	5 HET
1928	343	22600	3	23	71	0:00:27-0:00:28	28	0.1	HOM	34:27.0	0.254996	0.254998	0.1HOM	28	0	0	5	0	5 HOM
1929	344	22666	3	24	72	0:00:27-0:00:28	28	0.1	WT	34:27.0	6.04164	6.04166	0.1WT	28	1.942092857	0.980518744	5	1	5 WT
1930	345	22732	4	1	73	0:00:27-0:00:28	28	0.1	HOM	34:29.0	0.104863	0.104863	0.1HOM	28	2.416478286	1.132929452	5	0	5 HOM
1931	346	22798	4	3	75	0:00:27-0:00:28	28	0.1	HET	34:29.0	1.32897	1.32897	0.1HET	28	2.678828571	0.912992859	5	0	5 HET
1932	347	22864	4	4	76	0:00:27-0:00:28	28	0.1	HOM	34:29.0	0.225816	0.225817	0.1HOM	28	1.409958429	0.69717685	5	0	5 HOM
1933	348	22930	4	5	77	0:00:27-0:00:28	28	0.1	WT	34:29.0	0.174201	0.174201	0.1WT	28	0.185796757	0.061208163	5	0	5 WT
1934	349	22996	4	6	78	0:00:27-0:00:28	28	0.1	HET	34:29.0	1.26379	1.2638	0.1HET	28	1.293036571	0.87054493	5	0	5 HET
1935	350	23062	4	7	79	0:00:27-0:00:28	28	0.05	HOM	34:29.0	5.55401	5.55403	0.05HOM	28	0	0	5	1	5 HOM
1936	351	23128	4	8	80	0:00:27-0:00:28	28	0.05	WT	34:29.0	2.55406	2.55407	0.05WT	28	0.251510857	0.081753992	5	0	5 WT
1937	352	23194	4	9	81	0:00:27-0:00:28	28	0.05	HET	34:29.0	7.27128	7.27131	0.05HET	28	3.177642857	0.803406579	5	1	5 HET
1938	353	23260	4	10	82	0:00:27-0:00:28	28	0.05	HOM	34:29.0	4.04071	4.04072	0.05HOM	28	1.755331714	0.810469759	5	0	5 HOM
1939	357	23524	4	14	86	0:00:27-0:00:28	28	0	WT	34:29.0	9.11727	9.11731	0.0-WT	28	3.632434286	1.566236106	5	1	5 WT
1940	358	23590	4	15	87	0:00:27-0:00:28	28	0	HET	34:29.0	8.91926	8.9193	0.0-HET	28	0.601811571	0.490743471	5	1	5 HET
1941	359	23656	4	17	89	0:00:27-0:00:28	28	0	WT	34:29.0	2.90529	2.90531	0.0-WT	28	1.522209	0.981357487	5	0	5 WT
1942	360	23722	4	18	90	0:00:27-0:00:28	28	0	HET	34:29.0	1.42672	1.42673	0.0-HET	28	1.577842571	0.951897102	5	0	5 HET
1943	361	23788	4	19	91	0:00:27-0:00:28	28	0.5	HOM	34:29.0	2.37031	2.37033	0.5HOM	28	1.487772	1.748051726	5	0	5 HOM
1944	363	23920	4	21	93	0:00:27-0:00:28	28	0.5	HET	34:29.0	3.91771	3.91772	0.5HET	28	1.641836286	1.098903873	5	0	5 HET
1945	364	23986	4	22	94	0:00:27-0:00:28	28	0.5	HOM	34:29.0	0.33853	0.338532	0.5HOM	28	0.192014857	0.045201036	5	0	5 HOM
1946	365	24052	4	23	95	0:00:27-0:00:28	28	0.5	WT	34:29.0	3.14374	3.14375	0.5WT	28	0.487945286	0.556373516	5	0	5 WT
1947	366	24118	4	24	96	0:00:27-0:00:28	28	0.5	HET	34:29.0	0.354846	0.354847	0.5HET	28	0	0	5	0	5 HET
1948	367	24184	5	2	98	0:00:27-0:00:28	28	0	HET	34:30.0	2.54221	2.54222	0.0-HET	28	0	0	5	0	5 HET
1949	368	24250	5	3	99	0:00:27-0:00:28	28	0	HOM	34:30.0	2.98323	2.98324	0.0-HOM	28	1.844229143	0.865538789	5	0	5 HOM
1950	370	24382	5	8	104	0:00:27-0:00:28	28	0.05	HET	34:30.0	1.94136	1.94137	0.05HET	28	0	0	5	0	5 HET
1951	372	24514	5	11	107	0:00:27-0:00:28	28	0.05	HET	34:30.0	2.43444	2.43445	0.05HET	28	2.445215286	2.63914923	5	0	5 HET
1952	373	24580	5	12	108	0:00:27-0:00:28	28	0.05	HOM	34:30.0	3.2119	3.21191	0.05HOM	28	0.575410143	0.939186679	5	0	5 HOM
1953	375	24712	5	14	110	0:00:27-0:00:28	28	0.1	HET	34:30.0	5.11732	5.11734	0.1HET	28	2.717921429	1.717109229	5	1	5 HET
1954	376	24778	5	15	111	0:00:27-0:00:28	28	0.1	HOM	34:30.0	0	-	0.1HOM	28	1.323639429	1.024246744	5	0	5 HOM
1955	378	24910	5	17	113	0:00:27-0:00:28	28	0.1	HET	34:30.0	3.26728	3.2673	0.1HET	28	0.478415657	0.859803719	5	0	5 HET
1956	379	24976	5	18	114	0:00:27-0:00:28	28	0.1	HOM	34:30.0	5.85957	5.8596	0.1HOM	28	3.544155714	1.370413137	5	1	5 HOM
1957	382	25174	5	21	117	0:00:27-0:00:28	28	0.5	HOM	34:30.0	7.14047	7.1405	0.5HOM	28	6.449035714	2.875613417	5	1	5 HOM
1958	388	25570	6	3	123	0:00:27-0:00:28	28	0.5	WT	34:31.1	0.470748	0.470752	0.5WT	28	1.254090143	1.09461903	5	0	5 WT
1959	390	25702	6	5	125	0:00:27-0:00:28	28	0.5	HET	34:31.1	8.48177	8.48181	0.5HET	28	5.548232857	2.621915632	5	1	5 HET
1960	391	25768	6	6	126	0:00:27-0:00:28	28	0.5	WT	34:31.1	3.89387	3.89389	0.5WT	28	0.284694286	0.083926684	5	0	5 WT
1961	394	25966	6	10	130	0:00:27-0:00:28	28	0.1	HOM	34:31.1	3.21963	3.21965	0.1HOM	28	2.222066286	1.250461419	5	0	5 HOM
1962	396	26098	6	12	132	0:00:27-0:00:28	28	0.1	WT	34:31.1	0.459759	0.45976	0.1WT	28	0.123595614	0.081917985	5	0	5 WT
1963	398	26230	6	14	134	0:00:27-0:00:28	28	0.05	HET	34:31.1	0.253562	0.253561	0.05HET	28	1.062497143	1.699373055	5	0	5 HET
1964	402	26494	6	18	138	0:00:27-0:00:28	28	0.05	WT	34:31.1	3.52119	3.52121	0.05WT	28	1.961766286	1.142941225	5	0	5 WT
1965	404	26626	6	20	140	0:00:27-0:00:28	28	0	HET	34:31.1	4.1065	4.10652	0.0-HET	28	2.683890286	3.117624921	5	0	5 HET
1966	405	26692	6	21	141	0:00:27-0:00:28	28	0	WT	34:31.1	4.22085	4.22087	0.0-WT	28	2.749578571	1.04109058	5	0	5 WT
1967	406	26758	6	22	142	0:00:27-0:00:28	28	0	HOM	34:31.1	6.71952	6.71955	0.0-HOM	28	3.459727143	0.906673772	5	1	5 HOM
1968	407	26824	6	23	143	0:00:27-0:00:28	28	0	HET	34:31.1	0.399289	0.399292	0.0-HET	28	0.184876429	0.079722989	5	0	5 HET
1969	408	26890	7	1	145	0:00:27-0:00:28	28	0.05	HET	34:32.1	1.9139	1.91391	0.05HET	28	0.225916143	0.066528201	5	0	5 HET
1970	409	26956	7	2	146	0:00:27-0:00:28	28	0.05	HOM	34:32.1	4.14901	4.14903	0.05HOM	28	4.149767143	1.545972407	5	0	5 HOM
1971	410	27022	7	3	147	0:00:27-0:00:28	28	0.05	WT	34:32.1	4.10911	4.10913	0.05WT	28	2.430496157	1.809683959	5	0	5 WT
1972	411	27088	7	4	148	0:00:27-0:00:28	28	0.05	HET	34:32.1	6.10631	6.10633	0.05HET	28	0.813561029	1.052858082	5	1	5 HET
1973	412	27154	7	5	149	0:00:27-0:00:28	28	0.05	HOM	34:32.1	6.65375	6.65378	0.05HOM	28	2.453819286	1.704826601	5	1	5 HOM
1974	415	27352	7	8	152	0:00:27-0:00:28	28	0	HOM	34:32.1	0.377469	0.377469	0.0-HOM	28	0	0	5	0	5 HOM
1975	416	27418	7	9	153	0:00:27-0:00:28	28	0	WT	34:32.1	1.94993	1.94993	0.0-WT	28	3.54386	1.28892968	5	0	5 WT
1976	417	27484	7	10	154	0:00:27-0:00:28	28	0	HET	34:32.1	3.78564	3.78566	0.0-HET	28	1.655349857	1.267898776	5	0	5 HET
1977	418	27550	7	11	155	0:00:27-0:00:28	28	0	HOM	34:32.1	0.0441119	0.0441121	0.0-HOM	28	0.199838129	0.124432008	5	0	5 HOM
1978	419	27616	7	12	156	0:00:27-0:00:28	28	0	WT	34:32.1	10.4192	10.4192	0.0-WT	28	4.741980057	3.860151174	5	1	5 WT
1979	420	27682	7	13	157	0:00:27-0:00:28	28	0.5	HET	34:32.1	6.87758	6.87762	0.5HET	28	3.37518	1.86058891	5	1	5 HET
1980	421	27748	7	14	158	0:00:27-0:00:28	28	0.5	HOM	34:32.1	8.86847	8.86851	0.5HOM	28	1.540955571	0.909651702	5	1	5 HOM
1981	422	27814	7	15	159	0:00:27-0:00:28	28	0.5	WT	34:32.1	3.69333	3.69334	0.5WT	28	0	0	5	0	5 WT
1982	427	28144	7	20	164	0:00:27-0:00:28	28	0.1	HOM	34:32.1	10.8834	10.8834	0.1HOM	28	3.098356286	2.045602584	5	1	5 HOM
1983	428	28210	7	21	165	0:00:27-0:00:28	28	0.1	WT	34:32.1	4.94686	4.94688	0.1WT	28	2.629341571	1.186960434	5	1	5 WT
1984	429	28276	7	23	167	0:00:27-0:00:28	28	0.1	HOM	34:32.1	8.38396	8.38399	0.1HOM	28	0.028962456	0.029281924	5	1	5 HOM
1985	431	28408	8	1	169	0:00:27-0:00:28	28	0.1	HOM	34:33.1	7.09957	7.0996	0.1HOM	28	3.814302857	1.519407652	5	1	5 HOM
1986	432	28474	8	2	170	0:00:27-0:00:28	28	0.1	WT	34:33.1	2.7221	2.72212	0.1WT	28	2.770008714	1.532825163	5	0	5 WT
1987	433	28540	8	3	171	0:00:27-0:00:28	28	0.1	HET	34:33.1	2.47609	2.4761	0.1HET	28	1.997442571	1.292430549	5	0	5 HET
1988	436	28738	8	6	174	0:00:27-0:00:28	28	0.1	HET	34:33.1	2.88474	2.88475	0.1HET	28	0.021256989	0.022598218	5	0	5 HET
1989	437	28804	8	7	175	0:00:27-0:00:28	28	0.05	HOM	34:33.1	8.23407	8.2341	0.05HOM	28	1.422668286	0.881241427	5	1	5 HOM
1990	439	28936	8	9	177	0:00:27-0:00:28	28	0.05	HET	34:33.1	4.47853	4.47854	0.05HET	28	2.265922857	0.876776458	5	0	5 HET
1991	440	29002	8	10	178	0:00:27-0:00:28	28	0.05	HOM	34:33.1	4.67091	4.67093	0.05HOM	28	1.312080743	1.697046118	5	1	5 HOM
1992	441	29068	8	11	179	0:00:27-0:00:28	28	0.05	WT	34:33.1	4.42285	4.42287	0.05WT	28	1.467365143	0.621054876	5	0	5 WT
1993	442	29134	8	12	180	0:00:27-0:00:28	28	0.05	HET	34:33.1	0.88376	0.883762	0.05HET	28	1.558695571	0.824641664	5	0	5 HET
1994	443	29200	8	13	181	0:00:27-0:00:28	28	0	HOM	34:33.1	5.29273	5.29275	0.0-HOM	28	5.120158571	1.610347867	5	1	5 HOM
1995	444	29266	8	14	182	0:00:27-0:00:28	28	0	WT	34:33.1	2.96355	2.96356	0.0-WT	28	2.417332	1.486829717	5	0	5 WT
1996	445	29332	8	15	183	0:00:27-0:00:28	28	0	HET	34:33.1	2.34428	2.34429	0.0-HET	28	1.015548	0.636303845	5	0	5 HET
1997	446	29398	8	16	184	0:00:27-0:00:28	28	0	HOM	34:33.1	2.68733	2.68734	0.0-HOM	28	0.432392	0.324637049	5	0	5 HOM
1998	448	29530	8	18	186	0:00:27-0:00:28	28	0	HET	34:33.1	8.24992	8.24995	0.0-HET	28	3.167127571	1.983598426	5	1	5 HET
1999	450	29662	8	20	188	0:00:27-0:00:28	28	0.5	WT	34:33.1	7.9897	7.98973	0.5WT	28	2.444854286	1.537210945	5	1	5 WT
[truncated: 2,198 more rows]
