# Supplementary material for: Identification of slit3 as a locus affecting nicotine preference in zebrafish and human smoking behaviour
Source: eLife. 2020 Mar 25;9:e51295. doi: 10.7554/eLife.51295 (PMC7096180; doi:10.7554/eLife.51295)
Supplement: Figure 7—source data 1. [file elife-51295-fig7-data1.xlsx]

## Sheet: First round CPP
fish id	genotype	probe-basal1	treatment
31	hom	0.411555	amisulpride +
18	hom	-0.378476	control
36	hom	0.806011	nicotine
19	hom	-0.000852823	amisulpride +
1	hom	-0.134145	control
27	hom	-0.146357	nicotine
11	hom	0.239298	amisulpride +
29	hom	-0.137006	nicotine
12	hom	-0.0134469	amisulpride +
13	hom	-0.0171275	nicotine
46	hom	-0.129605	amisulpride +
5	hom	-0.183999	control
25	hom	0.285398	nicotine
45	hom	0.154854	amisulpride +
37	hom	0.117332	control
2	hom	0.0629451	nicotine
23	hom	0.543566	amisulpride +
55	hom	0.243315	control
50	wt	-0.402629	amisulpride +
24	wt	0.0291211	control
9	wt	-0.00561041	nicotine
33	wt	-0.208151	amisulpride +
3	wt	0.0951436	control
30	wt	-0.378242	nicotine
40	wt	-0.3837	amisulpride +
60	wt	-0.381554	control
47	wt	-0.0636014	nicotine
56	wt	0.128234	amisulpride +
39	wt	-0.0445857	control
28	wt	0.629974	nicotine
53	wt	0.167505	amisulpride +
8	wt	-0.125198	control
35	wt	0.431605	nicotine
41	wt	0.160069	amisulpride +
52	wt	0.144726	control
26	wt	0.0529564	nicotine
42	wt	-0.0946303	amisulpride +
49	wt	-0.139645	control
51	wt	0.0171531	nicotine
17	wt	0.177426	amisulpride +

## Sheet: Second Round CPP
genotype	treatment	change pref
hom	amisulpride	0.488759
hom	amisulpride	0.202567
hom	amisulpride	0.223121
hom	amisulpride	0.213906
hom	amisulpride	0.503113
hom	amisulpride	-0.402473
hom	amisulpride	0.513261
hom	control	-0.341399
hom	control	-0.0768201
hom	control	-0.048823
hom	control	0.0829225
hom	control	-0.0755614
hom	control	-0.122287
hom	nicotine	-0.213393
hom	nicotine	0.648118
hom	nicotine	0.45724
hom	nicotine	0.540648
hom	nicotine	-0.0154293
hom	nicotine	0.144131
hom	nicotine	0.210427
hom	nicotine	-0.169645
hom	nicotine	0.60115
genotype	treatment	change pref
tu	amisulpride	0.445148
tu	amisulpride	0.0289942
tu	amisulpride	-0.13451
tu	amisulpride	0.385053
tu	amisulpride	0.333173
tu	amisulpride	-0.148997
tu	control	0.412577
tu	control	0.0969535
tu	control	0.075948
tu	control	0.15709
tu	control	-0.112925
tu	control	-0.103376
tu	control	-0.13459
tu	nicotine	0.556585
tu	nicotine	-0.0498204
tu	nicotine	0.450629
tu	nicotine	0.209326
tu	nicotine	0.29451
tu	nicotine	0.256605
tu	nicotine	0.0848515
tu	nicotine	0.261486
genotype	treatment	change pref
wt	amisulpride	-0.139218
wt	amisulpride	-0.189891
wt	amisulpride	0.108553
wt	amisulpride	0.149624
wt	amisulpride	0.100152
wt	control	-0.207166
wt	control	-0.200362
wt	control	-0.0489443
wt	control	0.045436
wt	control	0.165123
wt	control	-0.097283
wt	nicotine	0.285643
wt	nicotine	0.0273697
wt	nicotine	0.0934378
wt	nicotine	0.159675
wt	nicotine	0.35719
wt	nicotine	-0.124881

## Sheet: combined CPP
genotype	treatment	change pref
hom	amisulpride	0.488759
hom	amisulpride	0.202567
hom	amisulpride	0.223121
hom	amisulpride	0.213906
hom	amisulpride	0.503113
hom	amisulpride	-0.402473
hom	amisulpride	0.513261
hom	amisulpride	0.411555
hom	amisulpride	-0.000852823
hom	amisulpride	0.239298
hom	amisulpride	-0.0134469
hom	amisulpride	-0.129605
hom	amisulpride	0.154854
hom	amisulpride	0.543566
hom	control	-0.341399
hom	control	-0.0768201
hom	control	-0.048823
hom	control	0.0829225
hom	control	-0.0755614
hom	control	-0.122287
hom	control	-0.378476
hom	control	-0.134145
hom	control	-0.183999
hom	control	0.117332
hom	control	0.243315
hom	nicotine	0.213393
hom	nicotine	0.648118
hom	nicotine	0.45724
hom	nicotine	0.540648
hom	nicotine	-0.0154293
hom	nicotine	0.144131
hom	nicotine	0.210427
hom	nicotine	0.60115
hom	nicotine	0.806011
hom	nicotine	-0.146357
hom	nicotine	-0.137006
hom	nicotine	-0.0171275
hom	nicotine	0.285398
hom	nicotine	0.0629451
tu	amisulpride	0.445148
tu	amisulpride	0.0289942
tu	amisulpride	-0.13451
tu	amisulpride	0.385053
tu	amisulpride	0.333173
tu	amisulpride	-0.148997
tu	control	0.412577
tu	control	0.0969535
tu	control	0.075948
tu	control	0.15709
tu	control	-0.112925
tu	control	-0.103376
tu	control	-0.13459
tu	nicotine	-0.0498204
tu	nicotine	0.450629
tu	nicotine	0.209326
tu	nicotine	0.29451
tu	nicotine	0.256605
tu	nicotine	0.0848515
tu	nicotine	0.261486
wt	amisulpride	-0.139218
wt	amisulpride	-0.189891
wt	amisulpride	0.108553
wt	amisulpride	0.149624
wt	amisulpride	0.100152
wt	amisulpride	-0.402629
wt	amisulpride	-0.208151
wt	amisulpride	-0.3837
wt	amisulpride	0.128234
wt	amisulpride	0.167505
wt	amisulpride	0.160069
wt	amisulpride	-0.0946303
wt	amisulpride	0.177426
wt	control	-0.207166
wt	control	-0.200362
wt	control	-0.0489443
wt	control	0.045436
wt	control	0.165123
wt	control	-0.097283
wt	control	0.0291211
wt	control	0.0951436
wt	control	-0.381554
wt	control	-0.0445857
wt	control	-0.125198
wt	control	0.144726
wt	control	-0.139645
wt	nicotine	0.285643
wt	nicotine	0.0273697
wt	nicotine	0.0934378
wt	nicotine	0.159675
wt	nicotine	0.35719
wt	nicotine	-0.124881
wt	nicotine	-0.00561041
wt	nicotine	-0.378242
wt	nicotine	-0.0636014
wt	nicotine	0.629974
wt	nicotine	0.431605
wt	nicotine	0.0529564
wt	nicotine	0.0171531

## Sheet: RESULTS
	Table Analyzed	Data 1
	Two-way ANOVA	Ordinary
	Alpha	0.05
	Source of Variation	% of total variation	P value	P value summary	Significant?
	Interaction	4.091	0.1471	ns	No
	Genotype	5.102	0.0299	*	Yes
	Treatment	15.16	0.0013	**	Yes
	ANOVA table	SS	DF	MS	F (DFn, DFd)	P value
	Interaction	0.2309	2	0.1154	F (2, 72) = 1.969	P = 0.1471
	Genotype	0.2879	1	0.2879	F (1, 72) = 4.910	P = 0.0299
	Treatment	0.8555	2	0.4278	F (2, 72) = 7.295	P = 0.0013
	Residual	4.222	72	0.05864
	Number of missing values	6
	Tukey's multiple comparisons test	Mean Diff.	95% CI of diff.	Significant?	Summary
	Slit3 +/+:control vs. Slit3 +/+:Nicotine	-0.17	-0.45 to 0.11	No	ns
	Slit3 +/+:control vs. Slit3 +/+:Nicotine +Amisulpride	-0.026	-0.30 to 0.25	No	ns
	Slit3 +/+:control vs. Slit3 -/-:control	0.025	-0.27 to 0.32	No	ns
	Slit3 +/+:control vs. Slit3 -/-:Nicotine	-0.32	-0.59 to -0.047	Yes	*
	Slit3 +/+:control vs. Slit3 -/-:Nicotine +Amisulpride	-0.27	-0.54 to 0.0037	No	ns
	Slit3 +/+:Nicotine vs. Slit3 +/+:Nicotine +Amisulpride	0.15	-0.13 to 0.42	No	ns
	Slit3 +/+:Nicotine vs. Slit3 -/-:control	0.2	-0.093 to 0.49	No	ns
	Slit3 +/+:Nicotine vs. Slit3 -/-:Nicotine	-0.15	-0.42 to 0.13	No	ns
	Slit3 +/+:Nicotine vs. Slit3 -/-:Nicotine +Amisulpride	-0.096	-0.37 to 0.18	No	ns
	Slit3 +/+:Nicotine +Amisulpride vs. Slit3 -/-:control	0.051	-0.24 to 0.34	No	ns
	Slit3 +/+:Nicotine +Amisulpride vs. Slit3 -/-:Nicotine	-0.29	-0.57 to -0.021	Yes	*
	Slit3 +/+:Nicotine +Amisulpride vs. Slit3 -/-:Nicotine +Amisulpride	-0.24	-0.52 to 0.030	No	ns
	Slit3 -/-:control vs. Slit3 -/-:Nicotine	-0.34	-0.63 to -0.059	Yes	**
	Slit3 -/-:control vs. Slit3 -/-:Nicotine +Amisulpride	-0.29	-0.58 to -0.0083	Yes	*
	Slit3 -/-:Nicotine vs. Slit3 -/-:Nicotine +Amisulpride	0.05	-0.22 to 0.32	No	ns
	Test details	Mean 1	Mean 2	Mean Diff.	SE of diff.	N1	N2	q	DF
	Slit3 +/+:control vs. Slit3 +/+:Nicotine	-0.059	0.11	-0.17	0.095	13	13	2.6	72
	Slit3 +/+:control vs. Slit3 +/+:Nicotine +Amisulpride	-0.059	-0.033	-0.026	0.095	13	13	0.39	72
	Slit3 +/+:control vs. Slit3 -/-:control	-0.059	-0.083	0.025	0.099	13	11	0.35	72
	Slit3 +/+:control vs. Slit3 -/-:Nicotine	-0.059	0.26	-0.32	0.093	13	14	4.8	72
	Slit3 +/+:control vs. Slit3 -/-:Nicotine +Amisulpride	-0.059	0.21	-0.27	0.093	13	14	4.1	72
	Slit3 +/+:Nicotine vs. Slit3 +/+:Nicotine +Amisulpride	0.11	-0.033	0.15	0.095	13	13	2.2	72
	Slit3 +/+:Nicotine vs. Slit3 -/-:control	0.11	-0.083	0.2	0.099	13	11	2.8	72
	Slit3 +/+:Nicotine vs. Slit3 -/-:Nicotine	0.11	0.26	-0.15	0.093	13	14	2.2	72
	Slit3 +/+:Nicotine vs. Slit3 -/-:Nicotine +Amisulpride	0.11	0.21	-0.096	0.093	13	14	1.5	72
	Slit3 +/+:Nicotine +Amisulpride vs. Slit3 -/-:control	-0.033	-0.083	0.051	0.099	13	11	0.72	72
	Slit3 +/+:Nicotine +Amisulpride vs. Slit3 -/-:Nicotine	-0.033	0.26	-0.29	0.093	13	14	4.5	72
	Slit3 +/+:Nicotine +Amisulpride vs. Slit3 -/-:Nicotine +Amisulpride	-0.033	0.21	-0.24	0.093	13	14	3.7	72
	Slit3 -/-:control vs. Slit3 -/-:Nicotine	-0.083	0.26	-0.34	0.098	11	14	5	72
	Slit3 -/-:control vs. Slit3 -/-:Nicotine +Amisulpride	-0.083	0.21	-0.29	0.098	11	14	4.3	72
	Slit3 -/-:Nicotine vs. Slit3 -/-:Nicotine +Amisulpride	0.26	0.21	0.05	0.092	14	14	0.78	72
