# Supplementary material for: Identification of slit3 as a locus affecting nicotine preference in zebrafish and human smoking behaviour
Source: eLife. 2020 Mar 25;9:e51295. doi: 10.7554/eLife.51295 (PMC7096180; doi:10.7554/eLife.51295)
Supplement: Figure 8—source data 1. [file elife-51295-fig8-data1.xlsx]

## Sheet: Raw 1057 1058
Experiment: LC#1057 (CB) Active filter: SYBR Green (483-533)									Experiment: LC#1058 (CB) Active filter: SYBR Green (483-533)
Chart	Pairing	Sample Name	Targets	References	Mean Cp	Mean Cp	Target/Ref		Chart	Pairing	Sample Name	Targets	References	Mean Cp	Mean Cp	Target/Ref
TRUE	A1/A7	Y1	a2	b-Act;EF1a;Rp1	20.1426	9.40429	0.000585		TRUE	A1/A7	Y1	Sert	b-Act;EF1a;Rp1	19.459	9.40429
TRUE	B1/B7	Y2	a2	b-Act;EF1a;Rp1	19.748	10.5299	0.00168		TRUE	B1/B7	Y2	Sert	b-Act;EF1a;Rp1	19.6576	10.5299
TRUE	C1/C7	Y3	a2	b-Act;EF1a;Rp1	21.3042	9.94849	0.000382		TRUE	C1/C7	Y3	Sert	b-Act;EF1a;Rp1	20.223	9.94849
TRUE	D1/D7	Y4	a2	b-Act;EF1a;Rp1	20.6522	9.76404	0.000528		TRUE	D1/D7	Y4	Sert	b-Act;EF1a;Rp1	19.5942	9.76404
TRUE	E1/E7	Y5	a2	b-Act;EF1a;Rp1	20.3861	9.61366	0.000572		TRUE	E1/E7	Y5	Sert	b-Act;EF1a;Rp1	19.2555	9.61366
TRUE	F1/F7	O1	a2	b-Act;EF1a;Rp1	20.9765	10.1085	0.000535		TRUE	F1/F7	O1	Sert	b-Act;EF1a;Rp1	19.091	10.1085
TRUE	G1/G7	O2	a2	b-Act;EF1a;Rp1	19.218	10.1477	0.00186		TRUE	G1/G7	O2	Sert	b-Act;EF1a;Rp1	19.4429	10.1477
TRUE	H1/H7	O3	a2	b-Act;EF1a;Rp1	21.1671	9.34899	0.000277		TRUE	H1/H7	O3	Sert	b-Act;EF1a;Rp1	19.07	9.34899
TRUE	I1/I7	O4	a2	b-Act;EF1a;Rp1	20.1351	9.91665	0.000839		TRUE	I1/I7	O4	Sert	b-Act;EF1a;Rp1	19.8006	9.91665
TRUE	J1/J7	O5	a2	b-Act;EF1a;Rp1	19.6596	9.83743	0.0011		TRUE	J1/J7	O5	Sert	b-Act;EF1a;Rp1	18.9766	9.83743
TRUE	K1/K7	P1	a2	b-Act;EF1a;Rp1	21.6312	10.0813	0.000334		TRUE	K1/K7	P1	Sert	b-Act;EF1a;Rp1	20.1321	10.0813
TRUE	L1/L7	P2	a2	b-Act;EF1a;Rp1	22.3984	10.276	0.000224		TRUE	L1/L7	P2	Sert	b-Act;EF1a;Rp1	19.9369	10.276
TRUE	M1/M7	P3	a2	b-Act;EF1a;Rp1	23.238	10.035	0.000106		TRUE	M1/M7	P3	Sert	b-Act;EF1a;Rp1	20.9229	10.035
TRUE	N1/N7	P4	a2	b-Act;EF1a;Rp1	23.244	10.4676	0.000143		TRUE	N1/N7	P4	Sert	b-Act;EF1a;Rp1	20.2785	10.4676
TRUE	O1/O7	P5	a2	b-Act;EF1a;Rp1	23.5041	9.98749	8.53e-05		TRUE	O1/O7	P5	Sert	b-Act;EF1a;Rp1	20.6835	9.98749
TRUE	P1/P7	NTC	a2	b-Act;EF1a;Rp1	0	0	Invalid		TRUE	P1/P7	NTC	Sert	b-Act;EF1a;Rp1	0	0
TRUE	A3/A7	Y1	a3	b-Act;EF1a;Rp1	19.9688	9.40429	0.00066		TRUE	A3/A7	Y1	a2a	b-Act;EF1a;Rp1	19.1875	9.40429
TRUE	B3/B7	Y2	a3	b-Act;EF1a;Rp1	19.5706	10.5299	0.0019		TRUE	B3/B7	Y2	a2a	b-Act;EF1a;Rp1	19.0181	10.5299
TRUE	C3/C7	Y3	a3	b-Act;EF1a;Rp1	20.9022	9.94849	0.000504		TRUE	C3/C7	Y3	a2a	b-Act;EF1a;Rp1	20.4515	9.94849
TRUE	D3/D7	Y4	a3	b-Act;EF1a;Rp1	20.8681	9.76404	0.000454		TRUE	D3/D7	Y4	a2a	b-Act;EF1a;Rp1	20.052	9.76404
TRUE	E3/E7	Y5	a3	b-Act;EF1a;Rp1	19.6378	9.61366	0.00096		TRUE	E3/E7	Y5	a2a	b-Act;EF1a;Rp1	19.4707	9.61366
TRUE	F3/F7	O1	a3	b-Act;EF1a;Rp1	20.313	10.1085	0.000847		TRUE	F3/F7	O1	a2a	b-Act;EF1a;Rp1	20.1198	10.1085
TRUE	G3/G7	O2	a3	b-Act;EF1a;Rp1	19.404	10.1477	0.00164		TRUE	G3/G7	O2	a2a	b-Act;EF1a;Rp1	18.8991	10.1477
TRUE	H3/H7	O3	a3	b-Act;EF1a;Rp1	20.8377	9.34899	0.000348		TRUE	H3/H7	O3	a2a	b-Act;EF1a;Rp1	20.8188	9.34899
TRUE	I3/I7	O4	a3	b-Act;EF1a;Rp1	19.8979	9.91665	0.000989		TRUE	I3/I7	O4	a2a	b-Act;EF1a;Rp1	19.6668	9.91665
TRUE	J3/J7	O5	a3	b-Act;EF1a;Rp1	19.804	9.83743	0.000999		TRUE	J3/J7	O5	a2a	b-Act;EF1a;Rp1	19.5823	9.83743
TRUE	K3/K7	P1	a3	b-Act;EF1a;Rp1	22.0162	10.0813	0.000255		TRUE	K3/K7	P1	a2a	b-Act;EF1a;Rp1	21.7236	10.0813
TRUE	L3/L7	P2	a3	b-Act;EF1a;Rp1	22.2761	10.276	0.000244		TRUE	L3/L7	P2	a2a	b-Act;EF1a;Rp1	22.4146	10.276
TRUE	M3/M7	P3	a3	b-Act;EF1a;Rp1	22.67	10.035	0.000157		TRUE	M3/M7	P3	a2a	b-Act;EF1a;Rp1	22.9879	10.035
TRUE	N3/N7	P4	a3	b-Act;EF1a;Rp1	21.9782	10.4676	0.000343		TRUE	N3/N7	P4	a2a	b-Act;EF1a;Rp1	21.6706	10.4676
TRUE	O3/O7	P5	a3	b-Act;EF1a;Rp1	22.9322	9.98749	0.000127		TRUE	O3/O7	P5	a2a	b-Act;EF1a;Rp1	22.6281	9.98749
TRUE	P3/P7	NTC	a3	b-Act;EF1a;Rp1	0	0	Invalid		TRUE	P3/P7	NTC	a2a	b-Act;EF1a;Rp1	0	0
TRUE	A5/A7	Y1	a4	b-Act;EF1a;Rp1	19.3265	9.40429	0.00103		TRUE	A5/A7	Y1	a2b	b-Act;EF1a;Rp1	19.9842	9.40429
TRUE	B5/B7	Y2	a4	b-Act;EF1a;Rp1	18.9268	10.5299	0.00297		TRUE	B5/B7	Y2	a2b	b-Act;EF1a;Rp1	19.3433	10.5299
TRUE	C5/C7	Y3	a4	b-Act;EF1a;Rp1	20.2402	9.94849	0.000798		TRUE	C5/C7	Y3	a2b	b-Act;EF1a;Rp1	20.8368	9.94849
TRUE	D5/D7	Y4	a4	b-Act;EF1a;Rp1	20.0659	9.76404	0.000792		TRUE	D5/D7	Y4	a2b	b-Act;EF1a;Rp1	20.6237	9.76404
TRUE	E5/E7	Y5	a4	b-Act;EF1a;Rp1	19.237	9.61366	0.00127		TRUE	E5/E7	Y5	a2b	b-Act;EF1a;Rp1	19.6732	9.61366
TRUE	F5/F7	O1	a4	b-Act;EF1a;Rp1	20.003	10.1085	0.00105		TRUE	F5/F7	O1	a2b	b-Act;EF1a;Rp1	20.5745	10.1085
TRUE	G5/G7	O2	a4	b-Act;EF1a;Rp1	18.7869	10.1477	0.00251		TRUE	G5/G7	O2	a2b	b-Act;EF1a;Rp1	19.5318	10.1477
TRUE	H5/H7	O3	a4	b-Act;EF1a;Rp1	19.9207	9.34899	0.000657		TRUE	H5/H7	O3	a2b	b-Act;EF1a;Rp1	20.8738	9.34899
TRUE	I5/I7	O4	a4	b-Act;EF1a;Rp1	19.5347	9.91665	0.00127		TRUE	I5/I7	O4	a2b	b-Act;EF1a;Rp1	19.8478	9.91665
TRUE	J5/J7	O5	a4	b-Act;EF1a;Rp1	19.1042	9.83743	0.00162		TRUE	J5/J7	O5	a2b	b-Act;EF1a;Rp1	19.3525	9.83743
TRUE	K5/K7	P1	a4	b-Act;EF1a;Rp1	21.9968	10.0813	0.000259		TRUE	K5/K7	P1	a2b	b-Act;EF1a;Rp1	21.3533	10.0813
TRUE	L5/L7	P2	a4	b-Act;EF1a;Rp1	21.4488	10.276	0.000433		TRUE	L5/L7	P2	a2b	b-Act;EF1a;Rp1	21.6537	10.276
TRUE	M5/M7	P3	a4	b-Act;EF1a;Rp1	22.1559	10.035	0.000225		TRUE	M5/M7	P3	a2b	b-Act;EF1a;Rp1	22.3618	10.035
TRUE	N5/N7	P4	a4	b-Act;EF1a;Rp1	21.7905	10.4676	0.00039		TRUE	N5/N7	P4	a2b	b-Act;EF1a;Rp1	21.626	10.4676
TRUE	O5/O7	P5	a4	b-Act;EF1a;Rp1	21.8983	9.98749	0.00026		TRUE	O5/O7	P5	a2b	b-Act;EF1a;Rp1	22.4179	9.98749
TRUE	P5/P7	NTC	a4	b-Act;EF1a;Rp1	0	0	Invalid		TRUE	P5/P7	NTC	a2b	b-Act;EF1a;Rp1	0	0
TRUE	A7/A7	Y1	a6	b-Act;EF1a;Rp1	0	9.40429	0		TRUE	A7/A7	Y1	adra2	b-Act;EF1a;Rp1	20.4582	9.40429
TRUE	B7/B7	Y2	a6	b-Act;EF1a;Rp1	0	10.5299	0		TRUE	B7/B7	Y2	adra2	b-Act;EF1a;Rp1	19.8321	10.5299
TRUE	C7/C7	Y3	a6	b-Act;EF1a;Rp1	0	9.94849	0		TRUE	C7/C7	Y3	adra2	b-Act;EF1a;Rp1	20.8474	9.94849
TRUE	D7/D7	Y4	a6	b-Act;EF1a;Rp1	0	9.76404	0		TRUE	D7/D7	Y4	adra2	b-Act;EF1a;Rp1	20.9852	9.76404
TRUE	E7/E7	Y5	a6	b-Act;EF1a;Rp1	0	9.61366	0		TRUE	E7/E7	Y5	adra2	b-Act;EF1a;Rp1	20.2698	9.61366
TRUE	F7/F7	O1	a6	b-Act;EF1a;Rp1	0	10.1085	0		TRUE	F7/F7	O1	adra2	b-Act;EF1a;Rp1	20.6486	10.1085
TRUE	G7/G7	O2	a6	b-Act;EF1a;Rp1	0	10.1477	0		TRUE	G7/G7	O2	adra2	b-Act;EF1a;Rp1	19.9662	10.1477
TRUE	H7/H7	O3	a6	b-Act;EF1a;Rp1	0	9.34899	0		TRUE	H7/H7	O3	adra2	b-Act;EF1a;Rp1	20.9137	9.34899
TRUE	I7/I7	O4	a6	b-Act;EF1a;Rp1	0	9.91665	0		TRUE	I7/I7	O4	adra2	b-Act;EF1a;Rp1	20.1039	9.91665
TRUE	J7/J7	O5	a6	b-Act;EF1a;Rp1	0	9.83743	0		TRUE	J7/J7	O5	adra2	b-Act;EF1a;Rp1	20.2461	9.83743
TRUE	K7/K7	P1	a6	b-Act;EF1a;Rp1	0	10.0813	0		TRUE	K7/K7	P1	adra2	b-Act;EF1a;Rp1	21.0692	10.0813
TRUE	L7/L7	P2	a6	b-Act;EF1a;Rp1	0	10.276	0		TRUE	L7/L7	P2	adra2	b-Act;EF1a;Rp1	20.9432	10.276
TRUE	M7/M7	P3	a6	b-Act;EF1a;Rp1	0	10.035	0		TRUE	M7/M7	P3	adra2	b-Act;EF1a;Rp1	21.698	10.035
TRUE	N7/N7	P4	a6	b-Act;EF1a;Rp1	0	10.4676	0		TRUE	N7/N7	P4	adra2	b-Act;EF1a;Rp1	21.3763	10.4676
TRUE	O7/O7	P5	a6	b-Act;EF1a;Rp1	0	9.98749	0		TRUE	O7/O7	P5	adra2	b-Act;EF1a;Rp1	21.3196	9.98749
TRUE	P7/P7	NTC	a6	b-Act;EF1a;Rp1	0	0	Invalid		TRUE	P7/P7	NTC	adra2	b-Act;EF1a;Rp1	0	0
TRUE	A9/A7	Y1	a7	b-Act;EF1a;Rp1	19.587	9.40429	0.00086		TRUE	A9/A7	Y1	NAT	b-Act;EF1a;Rp1	18.7277	9.40429
TRUE	B9/B7	Y2	a7	b-Act;EF1a;Rp1	19.0616	10.5299	0.0027		TRUE	B9/B7	Y2	NAT	b-Act;EF1a;Rp1	18.3741	10.5299
TRUE	C9/C7	Y3	a7	b-Act;EF1a;Rp1	20.568	9.94849	0.000636		TRUE	C9/C7	Y3	NAT	b-Act;EF1a;Rp1	20.06	9.94849
TRUE	D9/D7	Y4	a7	b-Act;EF1a;Rp1	20.6972	9.76404	0.000511		TRUE	D9/D7	Y4	NAT	b-Act;EF1a;Rp1	19.5611	9.76404
TRUE	E9/E7	Y5	a7	b-Act;EF1a;Rp1	19.6855	9.61366	0.000929		TRUE	E9/E7	Y5	NAT	b-Act;EF1a;Rp1	18.7923	9.61366
TRUE	F9/F7	O1	a7	b-Act;EF1a;Rp1	20.1863	10.1085	0.000925		TRUE	F9/F7	O1	NAT	b-Act;EF1a;Rp1	18.9452	10.1085
TRUE	G9/G7	O2	a7	b-Act;EF1a;Rp1	19.1122	10.1477	0.002		TRUE	G9/G7	O2	NAT	b-Act;EF1a;Rp1	18.1795	10.1477
TRUE	H9/H7	O3	a7	b-Act;EF1a;Rp1	20.6791	9.34899	0.000388		TRUE	H9/H7	O3	NAT	b-Act;EF1a;Rp1	18.8188	9.34899
TRUE	I9/I7	O4	a7	b-Act;EF1a;Rp1	19.5571	9.91665	0.00125		TRUE	I9/I7	O4	NAT	b-Act;EF1a;Rp1	18.4648	9.91665
TRUE	J9/J7	O5	a7	b-Act;EF1a;Rp1	19.1739	9.83743	0.00155		TRUE	J9/J7	O5	NAT	b-Act;EF1a;Rp1	18.1605	9.83743
TRUE	K9/K7	P1	a7	b-Act;EF1a;Rp1	22.2032	10.0813	0.000224		TRUE	K9/K7	P1	NAT	b-Act;EF1a;Rp1	20.0381	10.0813
TRUE	L9/L7	P2	a7	b-Act;EF1a;Rp1	22.1577	10.276	0.000265		TRUE	L9/L7	P2	NAT	b-Act;EF1a;Rp1	19.7102	10.276
TRUE	M9/M7	P3	a7	b-Act;EF1a;Rp1	22.7274	10.035	0.000151		TRUE	M9/M7	P3	NAT	b-Act;EF1a;Rp1	20.4181	10.035
TRUE	N9/N7	P4	a7	b-Act;EF1a;Rp1	22.8468	10.4676	0.000188		TRUE	N9/N7	P4	NAT	b-Act;EF1a;Rp1	20.0308	10.4676
TRUE	O9/O7	P5	a7	b-Act;EF1a;Rp1	24.246	9.98749	5.1e-05		TRUE	O9/O7	P5	NAT	b-Act;EF1a;Rp1	20.4003	9.98749
TRUE	P9/P7	NTC	a7	b-Act;EF1a;Rp1	0	0	Invalid		TRUE	P9/P7	NTC	NAT	b-Act;EF1a;Rp1	0	0
TRUE	A11/A7	Y1	b2	b-Act;EF1a;Rp1	19.2097	9.40429	0.00112		TRUE	A11/A7	Y1	oprm1	b-Act;EF1a;Rp1	18.852	9.40429
TRUE	B11/B7	Y2	b2	b-Act;EF1a;Rp1	18.7966	10.5299	0.00325		TRUE	B11/B7	Y2	oprm1	b-Act;EF1a;Rp1	18.7817	10.5299
TRUE	C11/C7	Y3	b2	b-Act;EF1a;Rp1	20.708	9.94849	0.000577		TRUE	C11/C7	Y3	oprm1	b-Act;EF1a;Rp1	19.5358	9.94849
TRUE	D11/D7	Y4	b2	b-Act;EF1a;Rp1	19.9111	9.76404	0.000882		TRUE	D11/D7	Y4	oprm1	b-Act;EF1a;Rp1	19.5095	9.76404
TRUE	E11/E7	Y5	b2	b-Act;EF1a;Rp1	19.585	9.61366	0.000996		TRUE	E11/E7	Y5	oprm1	b-Act;EF1a;Rp1	19.1078	9.61366
TRUE	F11/F7	O1	b2	b-Act;EF1a;Rp1	19.9063	10.1085	0.00112		TRUE	F11/F7	O1	oprm1	b-Act;EF1a;Rp1	19.2363	10.1085
TRUE	G11/G7	O2	b2	b-Act;EF1a;Rp1	18.7856	10.1477	0.00251		TRUE	G11/G7	O2	oprm1	b-Act;EF1a;Rp1	18.5668	10.1477
TRUE	H11/H7	O3	b2	b-Act;EF1a;Rp1	20.1989	9.34899	0.000542		TRUE	H11/H7	O3	oprm1	b-Act;EF1a;Rp1	19.4351	9.34899
TRUE	I11/I7	O4	b2	b-Act;EF1a;Rp1	19.5317	9.91665	0.00128		TRUE	I11/I7	O4	oprm1	b-Act;EF1a;Rp1	19.0797	9.91665
TRUE	J11/J7	O5	b2	b-Act;EF1a;Rp1	19.3239	9.83743	0.00139		TRUE	J11/J7	O5	oprm1	b-Act;EF1a;Rp1	18.8345	9.83743
TRUE	K11/K7	P1	b2	b-Act;EF1a;Rp1	21.4153	10.0813	0.000387		TRUE	K11/K7	P1	oprm1	b-Act;EF1a;Rp1	20.3025	10.0813
TRUE	L11/L7	P2	b2	b-Act;EF1a;Rp1	20.9989	10.276	0.000592		TRUE	L11/L7	P2	oprm1	b-Act;EF1a;Rp1	20.3467	10.276
TRUE	M11/M7	P3	b2	b-Act;EF1a;Rp1	22.9122	10.035	0.000133		TRUE	M11/M7	P3	oprm1	b-Act;EF1a;Rp1	20.723	10.035
TRUE	N11/N7	P4	b2	b-Act;EF1a;Rp1	21.7937	10.4676	0.000389		TRUE	N11/N7	P4	oprm1	b-Act;EF1a;Rp1	20.6456	10.4676
TRUE	O11/O7	P5	b2	b-Act;EF1a;Rp1	22.6251	9.98749	0.000157		TRUE	O11/O7	P5	oprm1	b-Act;EF1a;Rp1	20.7391	9.98749
TRUE	P11/P7	NTC	b2	b-Act;EF1a;Rp1	0	0	Invalid		TRUE	P11/P7	NTC	oprm1	b-Act;EF1a;Rp1	0	0
TRUE	A13/A7	Y1	b3	b-Act;EF1a;Rp1	20.9119	9.40429	0.000343		TRUE	A13/A7	Y1	oxt	b-Act;EF1a;Rp1	20.5102	9.40429
TRUE	B13/B7	Y2	b3	b-Act;EF1a;Rp1	19.9037	10.5299	0.00151		TRUE	B13/B7	Y2	oxt	b-Act;EF1a;Rp1	19.9806	10.5299
TRUE	C13/C7	Y3	b3	b-Act;EF1a;Rp1	21.5087	9.94849	0.000331		TRUE	C13/C7	Y3	oxt	b-Act;EF1a;Rp1	21.7809	9.94849
TRUE	D13/D7	Y4	b3	b-Act;EF1a;Rp1	22.298	9.76404	0.000169		TRUE	D13/D7	Y4	oxt	b-Act;EF1a;Rp1	21.3751	9.76404
TRUE	E13/E7	Y5	b3	b-Act;EF1a;Rp1	20.3834	9.61366	0.000573		TRUE	E13/E7	Y5	oxt	b-Act;EF1a;Rp1	20.5229	9.61366
TRUE	F13/F7	O1	b3	b-Act;EF1a;Rp1	21.0982	10.1085	0.000492		TRUE	F13/F7	O1	oxt	b-Act;EF1a;Rp1	21.2537	10.1085
TRUE	G13/G7	O2	b3	b-Act;EF1a;Rp1	20.8747	10.1477	0.00059		TRUE	G13/G7	O2	oxt	b-Act;EF1a;Rp1	19.848	10.1477
TRUE	H13/H7	O3	b3	b-Act;EF1a;Rp1	22.4895	9.34899	0.000111		TRUE	H13/H7	O3	oxt	b-Act;EF1a;Rp1	20.9681	9.34899
TRUE	I13/I7	O4	b3	b-Act;EF1a;Rp1	21.503	9.91665	0.000325		TRUE	I13/I7	O4	oxt	b-Act;EF1a;Rp1	20.2611	9.91665
TRUE	J13/J7	O5	b3	b-Act;EF1a;Rp1	20.9616	9.83743	0.000448		TRUE	J13/J7	O5	oxt	b-Act;EF1a;Rp1	20.0223	9.83743
TRUE	K13/K7	P1	b3	b-Act;EF1a;Rp1	23.2004	10.0813	0.000112		TRUE	K13/K7	P1	oxt	b-Act;EF1a;Rp1	22.3731	10.0813
TRUE	L13/L7	P2	b3	b-Act;EF1a;Rp1	25.5036	10.276	2.61e-05		TRUE	L13/L7	P2	oxt	b-Act;EF1a;Rp1	22.9486	10.276
TRUE	M13/M7	P3	b3	b-Act;EF1a;Rp1	24.4935	10.035	4.44e-05		TRUE	M13/M7	P3	oxt	b-Act;EF1a;Rp1	23.3008	10.035
TRUE	N13/N7	P4	b3	b-Act;EF1a;Rp1	25.0858	10.4676	3.98e-05		TRUE	N13/N7	P4	oxt	b-Act;EF1a;Rp1	22.6988	10.4676
TRUE	O13/O7	P5	b3	b-Act;EF1a;Rp1	26.4372	9.98749	1.12e-05		TRUE	O13/O7	P5	oxt	b-Act;EF1a;Rp1	23.192	9.98749
TRUE	P13/P7	NTC	b3	b-Act;EF1a;Rp1	0	0	Invalid		TRUE	P13/P7	NTC	oxt	b-Act;EF1a;Rp1	0	0
TRUE	A15/A7	Y1	b4	b-Act;EF1a;Rp1	19.447	9.40429	0.000948		TRUE	A15/A7	Y1	AVP	b-Act;EF1a;Rp1	20.0052	9.40429
TRUE	B15/B7	Y2	b4	b-Act;EF1a;Rp1	18.9908	10.5299	0.00284		TRUE	B15/B7	Y2	AVP	b-Act;EF1a;Rp1	20.9288	10.5299
TRUE	C15/C7	Y3	b4	b-Act;EF1a;Rp1	21.0297	9.94849	0.000462		TRUE	C15/C7	Y3	AVP	b-Act;EF1a;Rp1	21.1726	9.94849
TRUE	D15/D7	Y4	b4	b-Act;EF1a;Rp1	20.4591	9.76404	0.000603		TRUE	D15/D7	Y4	AVP	b-Act;EF1a;Rp1	20.6579	9.76404
TRUE	E15/E7	Y5	b4	b-Act;EF1a;Rp1	19.0034	9.61366	0.00149		TRUE	E15/E7	Y5	AVP	b-Act;EF1a;Rp1	20.7084	9.61366
TRUE	F15/F7	O1	b4	b-Act;EF1a;Rp1	20.4115	10.1085	0.000792		TRUE	F15/F7	O1	AVP	b-Act;EF1a;Rp1	19.6418	10.1085
TRUE	G15/G7	O2	b4	b-Act;EF1a;Rp1	19.0892	10.1477	0.00203		TRUE	G15/G7	O2	AVP	b-Act;EF1a;Rp1	20.6239	10.1477
TRUE	H15/H7	O3	b4	b-Act;EF1a;Rp1	21.1317	9.34899	0.000284		TRUE	H15/H7	O3	AVP	b-Act;EF1a;Rp1	19.6092	9.34899
TRUE	I15/I7	O4	b4	b-Act;EF1a;Rp1	19.5141	9.91665	0.00129		TRUE	I15/I7	O4	AVP	b-Act;EF1a;Rp1	20.3771	9.91665
TRUE	J15/J7	O5	b4	b-Act;EF1a;Rp1	19.15	9.83743	0.00157		TRUE	J15/J7	O5	AVP	b-Act;EF1a;Rp1	19.612	9.83743
TRUE	K15/K7	P1	b4	b-Act;EF1a;Rp1	22.1388	10.0813	0.000235		TRUE	K15/K7	P1	AVP	b-Act;EF1a;Rp1	20.7053	10.0813
TRUE	L15/L7	P2	b4	b-Act;EF1a;Rp1	22.7848	10.276	0.000172		TRUE	L15/L7	P2	AVP	b-Act;EF1a;Rp1	20.3674	10.276
TRUE	M15/M7	P3	b4	b-Act;EF1a;Rp1	22.6205	10.035	0.000163		TRUE	M15/M7	P3	AVP	b-Act;EF1a;Rp1	20.9458	10.035
TRUE	N15/N7	P4	b4	b-Act;EF1a;Rp1	22.6482	10.4676	0.000215		TRUE	N15/N7	P4	AVP	b-Act;EF1a;Rp1	20.4958	10.4676
TRUE	O15/O7	P5	b4	b-Act;EF1a;Rp1	22.6429	9.98749	0.000155		TRUE	O15/O7	P5	AVP	b-Act;EF1a;Rp1	20.7285	9.98749
TRUE	P15/P7	NTC	b4	b-Act;EF1a;Rp1	0	0	Invalid		TRUE	P15/P7	NTC	AVP	b-Act;EF1a;Rp1	0	0
TRUE	A17/A7	Y1	d1	b-Act;EF1a;Rp1	18.5422	9.40429	0.00178
TRUE	B17/B7	Y2	d1	b-Act;EF1a;Rp1	18.6831	10.5299	0.00351
TRUE	C17/C7	Y3	d1	b-Act;EF1a;Rp1	19.9518	9.94849	0.000974
TRUE	D17/D7	Y4	d1	b-Act;EF1a;Rp1	19.7425	9.76404	0.000991
TRUE	E17/E7	Y5	d1	b-Act;EF1a;Rp1	18.8382	9.61366	0.00167
TRUE	F17/F7	O1	d1	b-Act;EF1a;Rp1	19.0298	10.1085	0.00206
TRUE	G17/G7	O2	d1	b-Act;EF1a;Rp1	18.4615	10.1477	0.00314
TRUE	H17/H7	O3	d1	b-Act;EF1a;Rp1	19.2411	9.34899	0.00105
TRUE	I17/I7	O4	d1	b-Act;EF1a;Rp1	19.1542	9.91665	0.00166
TRUE	J17/J7	O5	d1	b-Act;EF1a;Rp1	18.5361	9.83743	0.00241
TRUE	K17/K7	P1	d1	b-Act;EF1a;Rp1	20.6915	10.0813	0.00064
TRUE	L17/L7	P2	d1	b-Act;EF1a;Rp1	20.4079	10.276	0.000891
TRUE	M17/M7	P3	d1	b-Act;EF1a;Rp1	21.1131	10.035	0.000463
TRUE	N17/N7	P4	d1	b-Act;EF1a;Rp1	20.2392	10.4676	0.00114
TRUE	O17/O7	P5	d1	b-Act;EF1a;Rp1	20.9726	9.98749	0.000493
TRUE	P17/P7	NTC	d1	b-Act;EF1a;Rp1	0	0	Invalid
TRUE	A19/A7	Y1	DAT	b-Act;EF1a;Rp1	0	9.40429	0
TRUE	B19/B7	Y2	DAT	b-Act;EF1a;Rp1	0	10.5299	0
TRUE	C19/C7	Y3	DAT	b-Act;EF1a;Rp1	0	9.94849	0
TRUE	D19/D7	Y4	DAT	b-Act;EF1a;Rp1	0	9.76404	0
TRUE	E19/E7	Y5	DAT	b-Act;EF1a;Rp1	0	9.61366	0
TRUE	F19/F7	O1	DAT	b-Act;EF1a;Rp1	0	10.1085	0
TRUE	G19/G7	O2	DAT	b-Act;EF1a;Rp1	0	10.1477	0
TRUE	H19/H7	O3	DAT	b-Act;EF1a;Rp1	0	9.34899	0
TRUE	I19/I7	O4	DAT	b-Act;EF1a;Rp1	0	9.91665	0
TRUE	J19/J7	O5	DAT	b-Act;EF1a;Rp1	0	9.83743	0
TRUE	K19/K7	P1	DAT	b-Act;EF1a;Rp1	0	10.0813	0
TRUE	L19/L7	P2	DAT	b-Act;EF1a;Rp1	0	10.276	0
TRUE	M19/M7	P3	DAT	b-Act;EF1a;Rp1	0	10.035	0
TRUE	N19/N7	P4	DAT	b-Act;EF1a;Rp1	0	10.4676	0
TRUE	O19/O7	P5	DAT	b-Act;EF1a;Rp1	0	9.98749	0
TRUE	P19/P7	NTC	DAT	b-Act;EF1a;Rp1	0	0	Invalid
TRUE	A21/A7	Y1	DBH	b-Act;EF1a;Rp1	20.0368	9.40429	0.00063
TRUE	B21/B7	Y2	DBH	b-Act;EF1a;Rp1	22.5107	10.5299	0.000247
TRUE	C21/C7	Y3	DBH	b-Act;EF1a;Rp1	21.3558	9.94849	0.000368
TRUE	D21/D7	Y4	DBH	b-Act;EF1a;Rp1	21.8536	9.76404	0.000229
TRUE	E21/E7	Y5	DBH	b-Act;EF1a;Rp1	21.2794	9.61366	0.000308
TRUE	F21/F7	O1	DBH	b-Act;EF1a;Rp1	21.5339	10.1085	0.000364
TRUE	G21/G7	O2	DBH	b-Act;EF1a;Rp1	22.3951	10.1477	0.000206
TRUE	H21/H7	O3	DBH	b-Act;EF1a;Rp1	21.4531	9.34899	0.000227
TRUE	I21/I7	O4	DBH	b-Act;EF1a;Rp1	22.0606	9.91665	0.000221
TRUE	J21/J7	O5	DBH	b-Act;EF1a;Rp1	21.6096	9.83743	0.000286
TRUE	K21/K7	P1	DBH	b-Act;EF1a;Rp1	22.3165	10.0813	0.000207
TRUE	L21/L7	P2	DBH	b-Act;EF1a;Rp1	21.4951	10.276	0.000419
TRUE	M21/M7	P3	DBH	b-Act;EF1a;Rp1	23.1524	10.035	0.000113
TRUE	N21/N7	P4	DBH	b-Act;EF1a;Rp1	22.9459	10.4676	0.000175
TRUE	O21/O7	P5	DBH	b-Act;EF1a;Rp1	23.5815	9.98749	8.09e-05
TRUE	P21/P7	NTC	DBH	b-Act;EF1a;Rp1	0	0	Invalid
TRUE	A23/A7	Y1	5HTa	b-Act;EF1a;Rp1	18.495	9.40429	0.00183
TRUE	B23/B7	Y2	5HTa	b-Act;EF1a;Rp1	18.5616	10.5299	0.00382
TRUE	C23/C7	Y3	5HTa	b-Act;EF1a;Rp1	19.4406	9.94849	0.00139
TRUE	D23/D7	Y4	5HTa	b-Act;EF1a;Rp1	19.3669	9.76404	0.00129
TRUE	E23/E7	Y5	5HTa	b-Act;EF1a;Rp1	18.6749	9.61366	0.00187
TRUE	F23/F7	O1	5HTa	b-Act;EF1a;Rp1	19.0363	10.1085	0.00205
TRUE	G23/G7	O2	5HTa	b-Act;EF1a;Rp1	18.4231	10.1477	0.00323
TRUE	H23/H7	O3	5HTa	b-Act;EF1a;Rp1	19.4796	9.34899	0.000892
TRUE	I23/I7	O4	5HTa	b-Act;EF1a;Rp1	18.7527	9.91665	0.00219
TRUE	J23/J7	O5	5HTa	b-Act;EF1a;Rp1	18.5061	9.83743	0.00246
TRUE	K23/K7	P1	5HTa	b-Act;EF1a;Rp1	19.7376	10.0813	0.00124
TRUE	L23/L7	P2	5HTa	b-Act;EF1a;Rp1	19.8597	10.276	0.0013
TRUE	M23/M7	P3	5HTa	b-Act;EF1a;Rp1	19.9629	10.035	0.00103
TRUE	N23/N7	P4	5HTa	b-Act;EF1a;Rp1	19.8645	10.4676	0.00148
TRUE	O23/O7	P5	5HTa	b-Act;EF1a;Rp1	20.0174	9.98749	0.000957
TRUE	P23/P7	NTC	5HTa	b-Act;EF1a;Rp1	0	0	Invalid

## Sheet: Teck_output
	1057+1058: n=2 (09 Jan 2019)
					from previous experiments 991, 1000													(two peaks)
		a2	a3	a4	a5	a5-repeat	a6	a7	b2	b3	b4	D1	d1	D2	D3	DAT	DBH	5HTa	Sert	a2a	a2b	adra2	NAT	oprm1	oxt	AVP
slit3 -/-	Y1	0.000585	0.00066	0.00103	0.00172	0.00155	0	0.00086	0.00112	0.000343	0.000948	0.00148	0.00178	0.00104	0.00134	0	0.00063	0.00183	0.00094	0.00113	0.000653	0.00047	0.00156	0.00143	0.000454	0.000644
slit3 -/-	Y2	0.00168	0.0019	0.00297	0.0007	0.000578	0	0.0027	0.00325	0.00151	0.00284	0.0027	0.00351	0.00238	0.00276	0	0.000247	0.00382	0.00179	0.00278	0.00222	0.00158	0.00435	0.00328	0.00143	0.000741
slit3 -/-	Y3	0.000382	0.000504	0.000798	0.000849	0.000789	0	0.000636	0.000577	0.000331	0.000462	0.000939	0.000974	0.000778	0.00104	0	0.000368	0.00139	0.000807	0.000689	0.000528	0.000524	0.000904	0.0013	0.000274	0.000418
slit3 -/-	Y4	0.000528	0.000454	0.000792	0.00069	0.000519	0	0.000511	0.000882	0.000169	0.000603	0.00119	0.000991	0.00064	0.00096	0	0.000229	0.00129	0.0011	0.0008	0.000538	0.000419	0.00112	0.00116	0.00032	0.000526
slit3 -/-	Y5	0.000572	0.00096	0.00127	0.000765	0.000548	0	0.000929	0.000996	0.000573	0.00149	0.00106	0.00167	0.001	0.00135	0	0.000308	0.00187	0.00125	0.00108	0.000937	0.00062	0.00173	0.00139	0.00052	0.000457
Slit3 +/-	O1	0.000535	0.000847	0.00105	0.000794	0.000931	0	0.000925	0.00112	0.000492	0.000792	0.00149	0.00206	0.000655	0.00102	0	0.000364	0.00205	0.00198	0.000969	0.000707	0.000672	0.00219	0.00179	0.000442	0.00135
Slit3 +/-	O2	0.00186	0.00164	0.00251	0.000773	0.000689	0	0.002	0.00251	0.00059	0.00203	0.0023	0.00314	0.00169	0.00238	0	0.000206	0.00323	0.00159	0.00232	0.0015	0.00111	0.00382	0.00292	0.0012	0.000702
Slit3 +/-	O3	0.000277	0.000348	0.000657	0.000845	0.000745	0	0.000388	0.000542	0.000111	0.000284	0.00101	0.00105	0.00051	0.000636	0	0.000227	0.000892	0.00118	0.000353	0.000339	0.00033	0.00141	0.00092	0.000318	0.000815
Slit3 +/-	O4	0.000839	0.000989	0.00127	0.000808	0.000842	0	0.00125	0.00128	0.000325	0.00129	0.00175	0.00166	0.00119	0.00147	0	0.000221	0.00219	0.00106	0.00116	0.00102	0.000858	0.00267	0.00174	0.000769	0.00071
Slit3 +/-	O5	0.0011	0.000999	0.00162	0.000688	0.000816	0	0.00155	0.00139	0.000448	0.00157	0.00195	0.00241	0.00105	0.0015	0	0.000286	0.00246	0.00177	0.00117	0.00137	0.000736	0.00312	0.00196	0.000859	0.00114
Slit3 +/+	P1	0.000334	0.000255	0.000259	0.000716	0.000522	0	0.000224	0.000387	0.000112	0.000235	0.000636	0.00064	0.000488	0.000533	0	0.000207	0.00124	0.000943	0.000313	0.000404	0.000492	0.00101	0.000838	0.000199	0.000634
Slit3 +/+	P2	0.000224	0.000244	0.000433	0.000673	0.000474	0	0.000265	0.000592	2.61e-05	0.000172	0.000547	0.000891	0.000223	0.000475	0	0.000419	0.0013	0.00124	0.000222	0.000376	0.000615	0.00145	0.00093	0.000153	0.000917
Slit3 +/+	P3	0.000106	0.000157	0.000225	0.00107	0.00105	0	0.000151	0.000133	4.44e-05	0.000163	0.000688	0.000463	0.000271	0.000457	0	0.000113	0.00103	0.000528	0.000126	0.000195	0.000308	0.000749	0.000606	0.000102	0.000519
Slit3 +/+	P4	0.000143	0.000343	0.00039	0.000685	0.000675	0	0.000188	0.000389	3.98e-05	0.000215	0.00072	0.00114	0.000225	0.000521	0	0.000175	0.00148	0.00111	0.000424	0.000438	0.00052	0.00132	0.000863	0.000208	0.000958
Slit3 +/+	P5	8.53e-05	0.000127	0.00026	0.000617	0.000567	0	5.1e-05	0.000157	1.12e-05	0.000155	0.000849	0.000493	0.000301	0.000539	0	8.09e-05	0.000957	0.000603	0.000157	0.000181	0.000388	0.000734	0.00058	0.000106	0.000584
	NTC	Invalid	Invalid	Invalid	0	0	Invalid	Invalid	Invalid	Invalid	Invalid	0	Invalid	0	0	Invalid	Invalid	Invalid	Invalid	Invalid	Invalid	Invalid	Invalid	Invalid	Invalid	Invalid

## Sheet: a2
Table Analyzed	a2		MEAN	SD	N	MEAN	SD	N	MEAN	SD	N
Data sets analyzed	A-C		Slit3 +/+			Slit3 +/-			slit3 -/-
			0.000158	9.1214e-05	5	0.00092	0.00066106	5	0.00082	0.000664831	5
ANOVA summary
F	2.899
P value	0.094
P value summary	ns
Significant diff. among means (P < 0.05)?	No
R square	0.3258
Brown-Forsythe test
F (DFn, DFd)	0.9943 (2, 12)
P value	0.3985
P value summary	ns
Are SDs significantly different (P < 0.05)?	No
Bartlett's test
Bartlett's statistic (corrected)	10
P value	0.0067
P value summary	**
Are SDs significantly different (P < 0.05)?	Yes
ANOVA table	SS	DF	MS	F (DFn, DFd)	P value
Treatment (between columns)	1.715e-06	2	8.574e-07	F (2, 12) = 2.899	P=0.0940
Residual (within columns)	3.549e-06	12	2.958e-07
Total	5.264e-06	14
Data summary
Number of treatments (columns)	3
Number of values (total)	15

## Sheet: a3
Table Analyzed	a3		MEAN	SD	N	MEAN	SD	N	MEAN	SD	N
Data sets analyzed	A-C		Slit3 +/+			Slit3 +/-			slit3 -/-
			0.00022	8.3666e-05	5	0.00102	0.000618061	5	0.00094	0.000626897	5
ANOVA summary
F	3.724
P value	0.0552
P value summary	ns
Significant diff. among means (P < 0.05)?	No
R square	0.383
Brown-Forsythe test
F (DFn, DFd)	1.162 (2, 12)
P value	0.3458
P value summary	ns
Are SDs significantly different (P < 0.05)?	No
Bartlett's test
Bartlett's statistic (corrected)	10.17
P value	0.0062
P value summary	**
Are SDs significantly different (P < 0.05)?	Yes
ANOVA table	SS	DF	MS	F (DFn, DFd)	P value
Treatment (between columns)	1.941e-06	2	9.707e-07	F (2, 12) = 3.724	P=0.0552
Residual (within columns)	3.128e-06	12	2.607e-07
Total	5.069e-06	14
Data summary
Number of treatments (columns)	3
Number of values (total)	15

## Sheet: a4
Table Analyzed	a4		MEAN	SD	N	MEAN	SD	N	MEAN	SD	N
Data sets analyzed	A-C		Slit3 +/+			Slit3 +/-			slit3 -/-
			0.00032	8.3666e-05	5	0.00154	0.00095289	5	0.00132	0.000944458	5
ANOVA summary
F	3.51
P value	0.0631
P value summary	ns
Significant diff. among means (P < 0.05)?	No
R square	0.3691
Brown-Forsythe test
F (DFn, DFd)	0.9720 (2, 12)
P value	0.4062
P value summary	ns
Are SDs significantly different (P < 0.05)?	No
Bartlett's test
Bartlett's statistic (corrected)	13.15
P value	0.0014
P value summary	**
Are SDs significantly different (P < 0.05)?	Yes
ANOVA table	SS	DF	MS	F (DFn, DFd)	P value
Treatment (between columns)	4.228e-06	2	2.114e-06	F (2, 12) = 3.510	P=0.0631
Residual (within columns)	7.228e-06	12	6.023e-07
Total	1.146e-05	14
Data summary
Number of treatments (columns)	3
Number of values (total)	15

## Sheet: a5
Table Analyzed	a5		MEAN	SD	N	MEAN	SD	N	MEAN	SD	N
Data sets analyzed	A-C		Slit3 +/+			Slit3 +/-			slit3 -/-
			0.0007522	0.000181228	5	0.0007816	5.85346e-05	5	0.0009448	0.000437976	5
ANOVA summary
F	0.708
P value	0.5121
P value summary	ns
Significant diff. among means (P < 0.05)?	No
R square	0.1055
Brown-Forsythe test
F (DFn, DFd)	0.8039 (2, 12)
P value	0.4703
P value summary	ns
Are SDs significantly different (P < 0.05)?	No
Bartlett's test
Bartlett's statistic (corrected)	10.85
P value	0.0044
P value summary	**
Are SDs significantly different (P < 0.05)?	Yes
ANOVA table	SS	DF	MS	F (DFn, DFd)	P value
Treatment (between columns)	1.077e-07	2	5.383e-08	F (2, 12) = 0.7080	P=0.5121
Residual (within columns)	9.124e-07	12	7.603e-08
Total	1.02e-06	14
Data summary
Number of treatments (columns)	3
Number of values (total)	15

## Sheet: a5-repeat
Table Analyzed	a5-repeat		MEAN	SD	N	MEAN	SD	N	MEAN	SD	N
Data sets analyzed	A-C		Slit3 +/+			Slit3 +/-			slit3 -/-
			0.000658	0.00023253	5	0.000806	9.12688e-05	5	0.000798	0.000433555	5
ANOVA summary
F	0.4151
P value	0.6694
P value summary	ns
Significant diff. among means (P < 0.05)?	No
R square	0.0647
Brown-Forsythe test
F (DFn, DFd)	0.6462 (2, 12)
P value	0.5414
P value summary	ns
Are SDs significantly different (P < 0.05)?	No
Bartlett's test
Bartlett's statistic (corrected)	6.936
P value	0.0312
P value summary	*
Are SDs significantly different (P < 0.05)?	Yes
ANOVA table	SS	DF	MS	F (DFn, DFd)	P value
Treatment (between columns)	6.928e-08	2	3.464e-08	F (2, 12) = 0.4151	P=0.6694
Residual (within columns)	1.001e-06	12	8.346e-08
Total	1.071e-06	14
Data summary
Number of treatments (columns)	3
Number of values (total)	15

## Sheet: a6
Table Analyzed	a6		MEAN	SD	N	MEAN	SD	N	MEAN	SD	N
Data sets analyzed	A-C
Error:See Commentary

## Sheet: a7
Table Analyzed	a7		MEAN	SD	N	MEAN	SD	N	MEAN	SD	N
Data sets analyzed	A-C		Slit3 +/+			Slit3 +/-			slit3 -/-
			0.00019	8.94427e-05	5	0.00126	0.000712741	5	0.00118	0.00103296	5
ANOVA summary
F	3.366
P value	0.0691
P value summary	ns
Significant diff. among means (P < 0.05)?	No
R square	0.3594
Brown-Forsythe test
F (DFn, DFd)	1.244 (2, 12)
P value	0.3229
P value summary	ns
Are SDs significantly different (P < 0.05)?	No
Bartlett's test
Bartlett's statistic (corrected)	12.68
P value	0.0018
P value summary	**
Are SDs significantly different (P < 0.05)?	Yes
ANOVA table	SS	DF	MS	F (DFn, DFd)	P value
Treatment (between columns)	3.552e-06	2	1.776e-06	F (2, 12) = 3.366	P=0.0691
Residual (within columns)	6.332e-06	12	5.277e-07
Total	9.884e-06	14
Data summary
Number of treatments (columns)	3
Number of values (total)	15

## Sheet: b2
Table Analyzed	b2		MEAN	SD	N	MEAN	SD	N	MEAN	SD	N
Data sets analyzed	A-C		Slit3 +/+			Slit3 +/-			slit3 -/-
			0.00034	0.000194936	5	0.0013	0.000974679	5	0.0013	0.000964365	5
ANOVA summary
F	2.403
P value	0.1326
P value summary	ns
Significant diff. among means (P < 0.05)?	No
R square	0.2859
Brown-Forsythe test
F (DFn, DFd)	0.4326 (2, 12)
P value	0.6586
P value summary	ns
Are SDs significantly different (P < 0.05)?	No
Bartlett's test
Bartlett's statistic (corrected)	7.387
P value	0.0249
P value summary	*
Are SDs significantly different (P < 0.05)?	Yes
ANOVA table	SS	DF	MS	F (DFn, DFd)	P value
Treatment (between columns)	3.072e-06	2	1.536e-06	F (2, 12) = 2.403	P=0.1326
Residual (within columns)	7.672e-06	12	6.393e-07
Total	1.074e-05	14
Data summary
Number of treatments (columns)	3
Number of values (total)	15

[truncated: 16 more sheets: b3, b4, D1, d_1, D2, D3, DAT, DBH, Sert, a2a, a2b, adra2, NAT, oprm1, oxt, AVP]
